# Supplementary material
Source: publisher figshare collection journal article supplement (https://rs.figshare.com/ndownloader/files/17842613)
Supplement: Supplementary file 1 [file 17842613]

50	0.7	0.4	1	1	0.03	0.04	0.2	0.9	10	1	577.47	0.0112
50	0.7	0.4	1	1	0.03	0.04	0.04	0.9	10	1	601.85	0.0146
50	0.8	0.3	1	1	0.03	0.04	0.2	0.1	10	1	706.68	0.0044
50	0.8	0.2	1	1	0.03	0.04	0.2	0.6	10	1	708.92	0.0067
50	0.7	0.4	1	1	0.03	0.04	0.2	0.5	10	1	555.28	0.0108
50	0.8	0.2	1	1	0.03	0.04	0.2	0.8	10	1	717.64	0.0051
50	0.7	0.4	1	1	0.03	0.04	0.2	0.6	10	1	583.83	0.0104
50	0.7	0.4	1	1	0.03	0.04	0.2	0.7	10	1	569.39	0.0116
50	0.8	0.01	1	1	0.03	0.04	0.04	0.4	10	1	803.94	0.0163
50	0.7	0.4	1	1	0.03	0.04	0.04	0.6	10	1	623.06	0.0179
50	0.7	0.4	1	1	0.03	0.04	0.2	0.8	10	1	577.78	0.0103
50	0.8	0.4	1	1	0.03	0.04	0.2	0.7	10	1	742.35	0.0054
50	0.7	0.4	1	1	0.03	0.04	0.2	0	10	1	548.92	0.009
50	0.8	0.2	1	1	0.03	0.04	0.2	0.5	10	1	716.87	0.0064
50	0.7	0.4	1	1	0.03	0.04	0.04	0.8	10	1	615.61	0.0184
50	0.7	0.4	1	1	0.03	0.04	0.2	0.2	10	1	562.24	0.0087
50	0.7	0.4	1	1	0.03	0.04	0.2	0.1	10	1	570.07	0.0091
50	0.7	0.5	1	1	0.03	0.04	0.2	0.9	10	1	572.47	0.0124
50	0.7	0.4	1	1	0.03	0.04	0.2	0.3	10	1	561.99	0.0084
50	0.7	0.4	1	1	0.03	0.04	0.04	0.7	10	1	615.83	0.0183
50	0.8	0.6	1	1	0.03	0.04	0.2	0.5	10	1	798.22	0.008
50	0.7	0.5	1	1	0.03	0.04	0.2	0.6	10	1	580.9	0.0129
50	0.7	0.5	1	1	0.03	0.04	0.2	0.4	10	1	587.11	0.0112
50	0.8	0.3	1	1	0.03	0.04	0.04	0.1	10	1	847.78	0.0161
50	0.7	0.5	1	1	0.03	0.04	0.2	0.3	10	1	575.53	0.0108
50	0.7	0.4	1	1	0.03	0.04	0.2	0.4	10	1	568.21	0.0096
50	0.7	0.5	1	1	0.03	0.04	0.2	0.5	10	1	586.58	0.011
50	0.7	0.5	1	1	0.03	0.04	0.2	0.2	10	1	583.95	0.0115
50	0.7	0.5	1	1	0.03	0.04	0.2	0	10	1	601.06	0.0122
50	0.7	0.5	1	1	0.03	0.04	0.2	0.7	10	1	602.26	0.0109
50	0.7	0.5	1	1	0.03	0.04	0.2	0.1	10	1	577.79	0.0103
50	0.7	0.4	1	1	0.03	0.04	0.04	0.3	10	1	616.7	0.019
50	0.7	0.4	1	1	0.03	0.04	0.04	0.2	10	1	618.8	0.0162
50	0.7	0.5	1	1	0.03	0.04	0.04	0.1	10	1	615.78	0.0171
50	0.7	0.4	1	1	0.03	0.04	0.04	0.4	10	1	618.71	0.0173
50	0.7	0.5	1	1	0.03	0.04	0.04	0.3	10	1	607.15	0.0179
50	0.7	0.5	1	1	0.03	0.04	0.04	0.5	10	1	626.43	0.0173
50	0.7	0.5	1	1	0.03	0.04	0.04	0.2	10	1	600.66	0.016
50	0.8	0.3	1	1	0.03	0.04	0.2	0.7	10	1	704.04	0.0055
50	0.7	0.4	1	1	0.03	0.04	0.04	0	10	1	631.91	0.0171
50	0.8	0.2	1	1	0.03	0.04	0.2	0.1	10	1	701.19	0.0045
50	0.7	0.5	1	1	0.03	0.04	0.04	0.7	10	1	633.98	0.0188
50	0.7	0.5	1	1	0.03	0.04	0.04	0.8	10	1	626.15	0.0196
50	0.7	0.6	1	1	0.03	0.04	0.2	0.9	10	1	616.95	0.0143
50	0.7	0.4	1	1	0.03	0.04	0.04	0.5	10	1	623.48	0.0194
50	0.7	0.5	1	1	0.03	0.04	0.04	0	10	1	628.08	0.0147
50	0.8	0.3	1	1	0.03	0.04	0.2	0.8	10	1	713.72	0.0061
50	0.7	0.5	1	1	0.03	0.04	0.04	0.6	10	1	642.64	0.0193
50	0.7	0.6	1	1	0.03	0.04	0.2	0.8	10	1	608.8	0.0162
50	0.7	0.4	1	1	0.03	0.04	0.04	0.1	10	1	659.61	0.0191
50	0.7	0.5	1	1	0.03	0.04	0.04	0.4	10	1	663.15	0.0206
50	0.8	0.3	1	1	0.03	0.04	0.2	0.5	10	1	736.63	0.005
50	0.8	0.2	1	1	0.03	0.04	0.2	0.3	10	1	713.19	0.0037
50	0.8	0.2	1	1	0.03	0.04	0.2	0.2	10	1	698.36	0.004
50	0.8	0.4	1	1	0.03	0.04	0.04	0.7	10	1	882.9	0.0215
50	0.8	0.3	1	1	0.03	0.04	0.2	0.9	10	1	730.6	0.0053
50	0.7	0.6	1	1	0.03	0.04	0.2	0.1	10	1	604.28	0.0142
50	0.7	0.6	1	1	0.03	0.04	0.04	0.9	10	1	660.2	0.021
50	0.7	0.6	1	1	0.03	0.04	0.2	0.5	10	1	628.84	0.0133
50	0.7	0.6	1	1	0.03	0.04	0.2	0.6	10	1	611.59	0.0172
50	0.8	0.3	1	1	0.03	0.04	0.2	0.6	10	1	745.38	0.0047
50	0.7	0.6	1	1	0.03	0.04	0.04	0.7	10	1	625.27	0.0178
50	0.7	0.6	1	1	0.03	0.04	0.2	0	10	1	639.73	0.0158
50	0.8	0.1	1	1	0.03	0.04	0.2	0.4	10	1	677.92	0.0033
50	0.7	0.5	1	1	0.03	0.04	0.2	0.8	10	1	594.74	0.0123
50	0.7	0.6	1	1	0.03	0.04	0.2	0.4	10	1	633.85	0.0132
50	0.7	0.6	1	1	0.03	0.04	0.2	0.2	10	1	617.64	0.0141
50	0.7	0.6	1	1	0.03	0.04	0.2	0.3	10	1	618.48	0.0135
50	0.7	0.6	1	1	0.03	0.04	0.04	0.6	10	1	659.88	0.0204
50	0.7	0.6	1	1	0.03	0.04	0.04	0.5	10	1	651.99	0.0208
50	0.8	0.2	1	1	0.03	0.04	0.04	0.9	10	1	841.01	0.0186
50	0.7	0.6	1	1	0.03	0.04	0.04	0.3	10	1	637.76	0.0186
50	0.7	0.5	1	1	0.03	0.04	0.04	0.9	10	1	627.55	0.0189
50	0.8	0.1	1	1	0.03	0.04	0.2	0.2	10	1	690.94	0.0043
50	0.8	0.2	1	1	0.03	0.04	0.04	0.2	10	1	823.33	0.017
50	0.8	0.1	1	1	0.03	0.04	0.2	0.1	10	1	681.1	0.0044
50	0.7	0.6	1	1	0.03	0.04	0.04	0.1	10	1	665.41	0.0205
50	0.7	0.7	1	1	0.03	0.04	0.2	0.6	10	1	669.81	0.0197
50	0.8	0.01	1	1	0.03	0.04	0.2	0.4	10	1	662.06	0.0038
50	0.9	0.1	1	1	0.03	0.04	0.2	0.3	10	1	1122.8	0.0018
50	0.8	0.01	1	1	0.03	0.04	0.2	0	10	1	662.57	0.0044
50	0.7	0.6	1	1	0.03	0.04	0.04	0	10	1	653.98	0.0191
50	0.7	0.6	1	1	0.03	0.04	0.04	0.2	10	1	670.84	0.0191
50	0.7	0.7	1	1	0.03	0.04	0.2	0.5	10	1	683.08	0.0207
50	0.8	0.2	1	1	0.03	0.04	0.2	0.7	10	1	688.53	0.0044
50	0.8	0.3	1	1	0.03	0.04	0.2	0.4	10	1	722.5	0.005
50	0.8	0.1	1	1	0.03	0.04	0.2	0.3	10	1	678.29	0.0047
50	0.7	0.7	1	1	0.03	0.04	0.04	0.8	10	1	678.34	0.0208
50	0.7	0.7	1	1	0.03	0.04	0.2	0.7	10	1	681.17	0.0207
50	0.8	0.6	1	1	0.03	0.04	0.04	0.6	10	1	916.2	0.0189
50	0.7	0.9	1	1	0.03	0.04	0.04	0.9	10	1	790.07	0.0142
50	0.8	0.01	1	1	0.03	0.04	0.2	0.1	10	1	667.64	0.0038
50	0.7	0.6	1	1	0.03	0.04	0.04	0.4	10	1	665.58	0.0199
50	0.7	0.7	1	1	0.03	0.04	0.2	0	10	1	693.21	0.0207
50	0.7	0.7	1	1	0.03	0.04	0.04	0.5	10	1	686.89	0.0214
50	0.8	0.4	1	1	0.03	0.04	0.2	0.9	10	1	719.29	0.0049
50	0.8	0.2	1	1	0.03	0.04	0.2	0.4	10	1	713.04	0.0055
50	0.8	0.2	1	1	0.03	0.04	0.04	0.1	10	1	803.97	0.0125
50	0.8	0.1	1	1	0.03	0.04	0.2	0.8	10	1	699.07	0.0049
50	0.7	0.7	1	1	0.03	0.04	0.04	0.6	10	1	698.93	0.022
50	0.7	0.7	1	1	0.03	0.04	0.04	0.7	10	1	693.15	0.0209
50	0.7	0.7	1	1	0.03	0.04	0.2	0.1	10	1	693.45	0.0211
50	0.8	0.3	1	1	0.03	0.04	0.04	0.8	10	1	871.78	0.0209
50	0.7	0.7	1	1	0.03	0.04	0.04	0.1	10	1	708.4	0.0232
50	0.7	0.8	1	1	0.03	0.04	0.04	0.8	10	1	721.68	0.0178
50	0.7	0.7	1	1	0.03	0.04	0.2	0.2	10	1	699.27	0.0221
50	0.8	0.3	1	1	0.03	0.04	0.2	0	10	1	728.11	0.005
50	0.8	0.3	1	1	0.03	0.04	0.04	0.5	10	1	855.77	0.018
50	0.8	0.4	1	1	0.03	0.04	0.2	0.5	10	1	741.5	0.0048
50	0.8	0.3	1	1	0.03	0.04	0.04	0.6	10	1	845.52	0.0188
50	0.7	0.7	1	1	0.03	0.04	0.04	0.4	10	1	704.17	0.0218
50	0.7	0.7	1	1	0.03	0.04	0.2	0.9	10	1	718.27	0.022
50	0.7	0.7	1	1	0.03	0.04	0.2	0.8	10	1	686.81	0.0207
50	0.7	0.7	1	1	0.03	0.04	0.04	0.2	10	1	714.49	0.0216
50	0.8	0.3	1	1	0.03	0.04	0.04	0.7	10	1	869.09	0.0196
50	0.8	0.2	1	1	0.03	0.04	0.04	0.3	10	1	824.17	0.0166
50	0.8	0.1	1	1	0.03	0.04	0.04	0.6	10	1	831.62	0.019
50	0.8	0.2	1	1	0.03	0.04	0.04	0.4	10	1	849.59	0.0176
50	0.7	0.7	1	1	0.03	0.04	0.04	0.3	10	1	709.32	0.0222
50	0.7	0.7	1	1	0.03	0.04	0.04	0.9	10	1	692.27	0.0218
50	0.7	0.7	1	1	0.03	0.04	0.2	0.3	10	1	713.74	0.0224
50	0.8	0.4	1	1	0.03	0.04	0.2	0.4	10	1	735.01	0.0067
50	0.8	0.01	1	1	0.03	0.04	0.2	0.3	10	1	679.19	0.0037
50	0.7	0.7	1	1	0.03	0.04	0.2	0.4	10	1	706.73	0.0222
50	0.7	0.8	1	1	0.03	0.04	0.04	0.5	10	1	724.53	0.018
50	0.8	0.1	1	1	0.03	0.04	0.2	0.9	10	1	690.5	0.0047
50	0.8	0.01	1	1	0.03	0.04	0.2	0.2	10	1	696.82	0.0033
50	0.8	0.3	1	1	0.03	0.04	0.04	0.9	10	1	871.51	0.0236
50	0.7	0.7	1	1	0.03	0.04	0.04	0	10	1	719.21	0.0226
50	0.8	0.4	1	1	0.03	0.04	0.2	0.8	10	1	723.25	0.0063
50	0.7	0.9	1	1	0.03	0.04	0.04	0.8	10	1	799.92	0.0136
50	0.7	0.8	1	1	0.03	0.04	0.04	0.9	10	1	723.07	0.017
50	0.8	0.1	1	1	0.03	0.04	0.2	0.6	10	1	681.81	0.0052
50	0.8	0.1	1	1	0.03	0.04	0.2	0.5	10	1	697.66	0.0056
50	0.8	0.4	1	1	0.03	0.04	0.2	0.6	10	1	751.98	0.005
50	0.8	0.01	1	1	0.03	0.04	0.2	0.8	10	1	700.68	0.0053
50	0.8	0.2	1	1	0.03	0.04	0.2	0.9	10	1	743.01	0.0065
50	0.8	0.01	1	1	0.03	0.04	0.2	0.9	10	1	718.41	0.0051
50	0.8	0.3	1	1	0.03	0.04	0.2	0.3	10	1	704.6	0.0038
50	0.8	0.1	1	1	0.03	0.04	0.2	0	10	1	658.51	0.0031
50	0.8	0.01	1	1	0.03	0.04	0.2	0.5	10	1	688.2	0.0053
50	0.8	0.01	1	1	0.03	0.04	0.2	0.6	10	1	704.93	0.0044
50	0.8	0.4	1	1	0.03	0.04	0.2	0.2	10	1	745.43	0.0051
50	0.8	0.01	1	1	0.03	0.04	0.2	0.7	10	1	697.4	0.0054
50	0.8	0.4	1	1	0.03	0.04	0.2	0.1	10	1	755.95	0.0056
50	0.7	0.8	1	1	0.03	0.04	0.04	0.7	10	1	760.69	0.019
50	0.8	0.1	1	1	0.03	0.04	0.2	0.7	10	1	722.36	0.0043
50	0.8	0.1	1	1	0.03	0.04	0.04	0.3	10	1	785.61	0.0152
50	0.8	0.1	1	1	0.03	0.04	0.04	0.1	10	1	786.9	0.0155
50	0.7	0.8	1	1	0.03	0.04	0.2	0.7	10	1	802.97	0.029
50	0.8	0.01	1	1	0.03	0.04	0.04	0	10	1	771.27	0.0144
50	0.8	0.3	1	1	0.03	0.04	0.2	0.2	10	1	722.06	0.0052
50	0.8	0.4	1	1	0.03	0.04	0.2	0.3	10	1	741.6	0.0043
50	0.8	0.01	1	1	0.03	0.04	0.04	0.1	10	1	767.61	0.014
50	0.7	0.8	1	1	0.03	0.04	0.04	0.3	10	1	783.47	0.022
50	0.7	0.8	1	1	0.03	0.04	0.2	0.9	10	1	831.23	0.0277
50	0.8	0.4	1	1	0.03	0.04	0.2	0	10	1	749.06	0.0055
50	0.8	0.5	1	1	0.03	0.04	0.2	0.3	10	1	763.06	0.0076
50	0.8	0.5	1	1	0.03	0.04	0.2	0	10	1	756.39	0.0058
50	0.7	0.8	1	1	0.03	0.04	0.04	0.4	10	1	776.92	0.0227
50	0.7	0.8	1	1	0.03	0.04	0.04	0.6	10	1	774.45	0.0193
50	0.7	0.9	1	1	0.03	0.04	0.04	0.4	10	1	879.1	0.0194
50	0.7	0.9	1	1	0.03	0.04	0.04	0.6	10	1	863.02	0.0162
50	0.8	0.01	1	1	0.03	0.04	0.04	0.2	10	1	792.72	0.0152
50	0.7	0.8	1	1	0.03	0.04	0.2	0.4	10	1	831.95	0.0298
50	0.7	0.8	1	1	0.03	0.04	0.04	0.2	10	1	777.91	0.0223
50	0.8	0.6	1	1	0.03	0.04	0.2	0.6	10	1	791.29	0.0088
50	0.8	0.5	1	1	0.03	0.04	0.2	0.4	10	1	755.23	0.0053
50	0.8	0.5	1	1	0.03	0.04	0.2	0.9	10	1	769.17	0.0075
50	0.7	0.8	1	1	0.03	0.04	0.2	0.6	10	1	815.68	0.0302
50	0.8	0.1	1	1	0.03	0.04	0.04	0	10	1	793.04	0.0144
50	0.8	0.6	1	1	0.03	0.04	0.2	0	10	1	790.43	0.0081
50	0.7	0.8	1	1	0.03	0.04	0.2	0.8	10	1	825.42	0.031
50	0.8	0.1	1	1	0.03	0.04	0.04	0.4	10	1	808.91	0.0161
50	0.8	0.01	1	1	0.03	0.04	0.04	0.5	10	1	801.32	0.0162
50	0.9	0.5	1	1	0.03	0.04	0.2	0.4	10	1	1191.6	0.0023
50	0.8	0.6	1	1	0.03	0.04	0.2	0.1	10	1	788.47	0.0057
50	0.8	0.5	1	1	0.03	0.04	0.2	0.5	10	1	780.1	0.0075
50	0.8	0.2	1	1	0.03	0.04	0.2	0	10	1	701.33	0.0041
50	0.8	0.01	1	1	0.03	0.04	0.04	0.3	10	1	794.77	0.0148
50	0.7	0.8	1	1	0.03	0.04	0.04	0	10	1	826.38	0.0248
50	0.7	0.8	1	1	0.03	0.04	0.2	0.2	10	1	840.88	0.0317
50	0.7	0.6	1	1	0.03	0.04	0.2	0.7	10	1	613.34	0.0143
50	0.8	0.5	1	1	0.03	0.04	0.2	0.1	10	1	766.52	0.0057
50	0.8	0.1	1	1	0.03	0.04	0.04	0.2	10	1	809.37	0.0175
50	0.8	0.1	1	1	0.03	0.04	0.04	0.9	10	1	835.82	0.0225
50	0.8	0.6	1	1	0.03	0.04	0.2	0.8	10	1	828.08	0.0098
50	0.9	0.5	1	1	0.03	0.04	0.2	0.9	10	1	1344.2	0.005
50	0.8	0.6	1	1	0.03	0.04	0.2	0.4	10	1	798.64	0.0078
50	0.7	0.9	1	1	0.03	0.04	0.04	0.5	10	1	929.11	0.0185
50	0.8	0.5	1	1	0.03	0.04	0.2	0.6	10	1	773.23	0.0068
50	0.8	0.5	1	1	0.03	0.04	0.2	0.8	10	1	790.52	0.0085
50	0.9	0.8	1	1	0.03	0.04	0.2	0.1	10	1	1467.4	0.0066
50	0.9	0.7	1	1	0.03	0.04	0.2	0.5	10	1	1395.4	0.0048
50	0.8	0.3	1	1	0.03	0.04	0.04	0	10	1	832.11	0.0164
50	0.8	0.5	1	1	0.03	0.04	0.2	0.7	10	1	791.9	0.008
50	0.7	0.9	1	1	0.03	0.04	0.04	0.7	10	1	917.29	0.0183
50	0.8	0.6	1	1	0.03	0.04	0.04	0.5	10	1	862.38	0.0174
50	0.8	0.4	1	1	0.03	0.04	0.04	0.4	10	1	841.41	0.0163
50	0.7	0.8	1	1	0.03	0.04	0.2	0.3	10	1	847.01	0.0336
50	0.8	0.6	1	1	0.03	0.04	0.2	0.2	10	1	807.23	0.0071
50	0.8	0.5	1	1	0.03	0.04	0.2	0.2	10	1	788.9	0.0045
50	0.9	0.8	1	1	0.03	0.04	0.2	0	10	1	1467.5	0.0076
50	0.8	0.6	1	1	0.03	0.04	0.2	0.9	10	1	836.5	0.0101
50	0.7	0.8	1	1	0.03	0.04	0.04	0.1	10	1	813.34	0.0228
50	0.7	0.8	1	1	0.03	0.04	0.2	0.5	10	1	851.21	0.0299
50	0.8	0.1	1	1	0.03	0.04	0.04	0.7	10	1	848	0.0195
50	0.8	0.2	1	1	0.03	0.04	0.04	0.6	10	1	855.18	0.0175
50	0.8	0.1	1	1	0.03	0.04	0.04	0.5	10	1	851.71	0.0189
50	0.8	0.1	1	1	0.03	0.04	0.04	0.8	10	1	850.89	0.0219
50	0.8	0.4	1	1	0.03	0.04	0.04	0.2	10	1	842.19	0.0149
50	0.8	0.6	1	1	0.03	0.04	0.2	0.3	10	1	831.1	0.0093
50	0.8	0.2	1	1	0.03	0.04	0.04	0.5	10	1	851.91	0.0186
50	0.9	0.1	1	1	0.03	0.04	0.04	0.3	10	1	1426.7	0.0188
50	0.8	0.7	1	1	0.03	0.04	0.2	0	10	1	843	0.0119
50	0.8	0.4	1	1	0.03	0.04	0.04	0.9	10	1	872.33	0.0217
50	0.8	0.2	1	1	0.03	0.04	0.04	0.8	10	1	841.19	0.0196
50	0.7	0.8	1	1	0.03	0.04	0.2	0.1	10	1	873.95	0.0328
50	0.7	0.6	1	1	0.03	0.04	0.04	0.8	10	1	674.95	0.0178
50	0.8	0.6	1	1	0.03	0.04	0.04	0.1	10	1	844.08	0.0138
50	0.8	0.7	1	1	0.03	0.04	0.2	0.4	10	1	862.7	0.0092
50	0.8	0.6	1	1	0.03	0.04	0.2	0.7	10	1	829.45	0.0077
50	0.8	0.3	1	1	0.03	0.04	0.04	0.2	10	1	838.04	0.0151
50	0.7	0.9	1	1	0.03	0.04	0.04	0.3	10	1	965.34	0.0241
50	0.8	0.4	1	1	0.03	0.04	0.04	0.6	10	1	873.58	0.0182
50	0.8	0.4	1	1	0.03	0.04	0.04	0.1	10	1	859.01	0.0185
50	0.8	0.4	1	1	0.03	0.04	0.04	0.5	10	1	882.98	0.0197
50	0.7	0.8	1	1	0.03	0.04	0.2	0	10	1	856.85	0.0352
50	0.8	0.01	1	1	0.03	0.04	0.04	0.9	10	1	855.92	0.023
50	0.8	0.7	1	1	0.03	0.04	0.2	0.7	10	1	869.56	0.012
50	0.8	0.3	1	1	0.03	0.04	0.04	0.3	10	1	831.02	0.0168
50	0.8	0.7	1	1	0.03	0.04	0.2	0.9	10	1	868.78	0.0115
50	0.7	0.9	1	1	0.03	0.04	0.04	0.1	10	1	947.68	0.0229
50	0.8	0.7	1	1	0.03	0.04	0.2	0.5	10	1	867.88	0.0129
50	0.8	0.01	1	1	0.03	0.04	0.04	0.6	10	1	822.73	0.0186
50	0.9	0.5	1	1	0.03	0.04	0.2	0.5	10	1	1271.1	0.0032
50	0.8	0.2	1	1	0.03	0.04	0.04	0.7	10	1	884.58	0.0224
50	0.8	0.5	1	1	0.03	0.04	0.04	0	10	1	837.09	0.0145
50	0.9	0.1	1	1	0.03	0.04	0.2	0.1	10	1	1083.6	0.0011
50	0.8	0.7	1	1	0.03	0.04	0.2	0.1	10	1	890.32	0.0106
50	0.8	0.4	1	1	0.03	0.04	0.04	0.3	10	1	874.55	0.0169
50	0.8	0.01	1	1	0.03	0.04	0.04	0.8	10	1	844.69	0.0223
50	0.7	0.9	1	1	0.03	0.04	0.2	0.8	10	1	1080.5	0.0408
50	0.8	0.5	1	1	0.03	0.04	0.04	0.3	10	1	867.82	0.0168
50	0.8	0.4	1	1	0.03	0.04	0.04	0	10	1	866.94	0.0141
50	0.8	0.7	1	1	0.03	0.04	0.2	0.8	10	1	889.49	0.0125
50	0.8	0.01	1	1	0.03	0.04	0.04	0.7	10	1	828.6	0.0213
50	0.9	0.01	1	1	0.03	0.04	0.2	0.8	10	1	1185.8	0.0029
50	0.7	0.9	1	1	0.03	0.04	0.04	0	10	1	1003.2	0.027
50	0.8	0.7	1	1	0.03	0.04	0.04	0.2	10	1	917	0.0166
50	0.9	0.2	1	1	0.03	0.04	0.2	0.1	10	1	1107.8	0.0009
50	0.8	0.4	1	1	0.03	0.04	0.04	0.8	10	1	886.84	0.0197
50	0.9	0.4	1	1	0.03	0.04	0.2	0.8	10	1	1254.6	0.0039
50	0.8	0.5	1	1	0.03	0.04	0.04	0.5	10	1	886.57	0.0212
50	0.9	0.1	1	1	0.03	0.04	0.04	0.4	10	1	1474.8	0.0188
50	0.8	0.6	1	1	0.03	0.04	0.04	0	10	1	895.2	0.0165
50	0.8	0.6	1	1	0.03	0.04	0.04	0.8	10	1	911.4	0.019
50	0.8	0.6	1	1	0.03	0.04	0.04	0.2	10	1	883.06	0.0172
50	0.8	0.3	1	1	0.03	0.04	0.04	0.4	10	1	844.31	0.0172
50	0.8	0.8	1	1	0.03	0.04	0.04	0.6	10	1	957.55	0.0193
50	0.9	0.01	1	1	0.03	0.04	0.2	0.4	10	1	1103	0.0022
50	0.8	0.6	1	1	0.03	0.04	0.04	0.9	10	1	923.47	0.0215
50	0.8	0.7	1	1	0.03	0.04	0.04	0.4	10	1	925.58	0.0186
50	0.8	0.5	1	1	0.03	0.04	0.04	0.2	10	1	870.05	0.018
50	0.8	0.2	1	1	0.03	0.04	0.04	0	10	1	817.4	0.0146
50	0.8	0.7	1	1	0.03	0.04	0.04	0.1	10	1	913.81	0.0173
50	0.8	0.6	1	1	0.03	0.04	0.04	0.4	10	1	901.93	0.0172
50	0.8	0.7	1	1	0.03	0.04	0.2	0.2	10	1	861.72	0.0129
50	0.7	0.9	1	1	0.03	0.04	0.2	0.7	10	1	1138.7	0.0436
50	0.8	0.99	1	1	0.03	0.04	0.04	0.7	10	1	2131.2	0.0084
50	0.9	0.2	1	1	0.03	0.04	0.2	0	10	1	1076	0.0006
50	0.8	0.6	1	1	0.03	0.04	0.04	0.3	10	1	930.44	0.0181
50	0.8	0.5	1	1	0.03	0.04	0.04	0.6	10	1	882.97	0.0197
50	0.8	0.5	1	1	0.03	0.04	0.04	0.9	10	1	903.43	0.0197
50	0.8	0.7	1	1	0.03	0.04	0.2	0.6	10	1	890.07	0.0124
50	0.8	0.9	1	1	0.03	0.04	0.04	0.8	10	1	1054.9	0.0141
50	0.8	0.7	1	1	0.03	0.04	0.04	0	10	1	942.32	0.0168
50	0.8	0.5	1	1	0.03	0.04	0.04	0.1	10	1	887.21	0.0164
50	0.8	0.5	1	1	0.03	0.04	0.04	0.4	10	1	897.32	0.0192
50	0.8	0.5	1	1	0.03	0.04	0.04	0.7	10	1	896.49	0.017
50	0.8	0.7	1	1	0.03	0.04	0.04	0.7	10	1	949.32	0.0197
50	0.8	0.5	1	1	0.03	0.04	0.04	0.8	10	1	898.68	0.0214
50	0.8	0.7	1	1	0.03	0.04	0.04	0.9	10	1	967.69	0.0213
50	0.8	0.7	1	1	0.03	0.04	0.04	0.5	10	1	956.64	0.0211
50	0.7	0.9	1	1	0.03	0.04	0.2	0.9	10	1	1074.1	0.0389
50	0.9	0.01	1	1	0.03	0.04	0.04	0.8	10	1	1509.9	0.0311
50	0.8	0.7	1	1	0.03	0.04	0.04	0.3	10	1	949	0.0183
50	0.8	0.6	1	1	0.03	0.04	0.04	0.7	10	1	951.95	0.0191
50	0.8	0.8	1	1	0.03	0.04	0.2	0.9	10	1	1037.8	0.0205
50	0.7	0.9	1	1	0.03	0.04	0.2	0.3	10	1	1161	0.0494
50	0.8	0.8	1	1	0.03	0.04	0.04	0	10	1	981.67	0.0168
50	0.8	0.9	1	1	0.03	0.04	0.04	0.3	10	1	1095	0.0189
50	0.8	0.7	1	1	0.03	0.04	0.04	0.6	10	1	989.35	0.019
50	0.7	0.9	1	1	0.03	0.04	0.2	0.5	10	1	1123.4	0.046
50	0.7	0.3	1	1	0.03	0.04	0.2	0.5	10	1	549.56	0.0107
50	0.7	0.9	1	1	0.03	0.04	0.2	0.6	10	1	1113.4	0.0439
50	0.8	0.8	1	1	0.03	0.04	0.2	0.5	10	1	985.69	0.0188
50	0.9	0.2	1	1	0.03	0.04	0.04	0.8	10	1	1583.9	0.0285
50	0.8	0.8	1	1	0.03	0.04	0.04	0.5	10	1	999.33	0.02
50	0.8	0.7	1	1	0.03	0.04	0.04	0.8	10	1	988.16	0.0194
50	0.8	0.8	1	1	0.03	0.04	0.2	0.6	10	1	989.68	0.0191
50	0.8	0.8	1	1	0.03	0.04	0.04	0.3	10	1	1005.6	0.0183
50	0.8	0.8	1	1	0.03	0.04	0.2	0	10	1	1036.7	0.0214
50	0.7	0.9	1	1	0.03	0.04	0.2	0.1	10	1	1190.4	0.0554
50	0.9	0.5	1	1	0.03	0.04	0.04	0.5	10	1	1573	0.0217
50	0.8	0.8	1	1	0.03	0.04	0.04	0.2	10	1	1025.6	0.0204
50	0.8	0.8	1	1	0.03	0.04	0.2	0.3	10	1	1002.7	0.0188
50	0.8	0.9	1	1	0.03	0.04	0.04	0.9	10	1	1161.1	0.0162
50	0.8	0.8	1	1	0.03	0.04	0.04	0.1	10	1	1015	0.02
50	0.8	0.9	1	1	0.03	0.04	0.04	0.7	10	1	1157	0.0157
50	0.8	0.8	1	1	0.03	0.04	0.2	0.2	10	1	1029.2	0.0202
50	0.7	0.2	1	1	0.03	0.04	0.2	0.7	10	1	530	0.0075
50	0.8	0.9	1	1	0.03	0.04	0.04	0.6	10	1	1138.6	0.0167
50	0.7	0.9	1	1	0.03	0.04	0.2	0	10	1	1219.7	0.0562
50	0.8	0.8	1	1	0.03	0.04	0.04	0.7	10	1	1030.9	0.0201
50	0.8	0.8	1	1	0.03	0.04	0.2	0.1	10	1	1024.8	0.0201
50	0.8	0.8	1	1	0.03	0.04	0.2	0.4	10	1	1018.6	0.0203
50	0.7	0.1	1	1	0.03	0.04	0.2	0	10	1	524.48	0.0088
50	0.8	0.8	1	1	0.03	0.04	0.04	0.4	10	1	1043.1	0.0201
50	0.8	0.9	1	1	0.03	0.04	0.04	0.1	10	1	1244.1	0.024
50	0.9	0.01	1	1	0.03	0.04	0.04	0.2	10	1	1390.3	0.0143
50	0.8	0.8	1	1	0.03	0.04	0.2	0.7	10	1	1035.9	0.021
50	0.9	0.1	1	1	0.03	0.04	0.2	0	10	1	1068.7	0.0011
50	0.8	0.8	1	1	0.03	0.04	0.04	0.8	10	1	1019.1	0.0203
50	0.8	0.9	1	1	0.03	0.04	0.2	0.8	10	1	1288.5	0.0338
50	0.8	0.9	1	1	0.03	0.04	0.04	0.4	10	1	1212.3	0.0207
50	0.8	0.9	1	1	0.03	0.04	0.04	0	10	1	1225.9	0.026
50	0.7	0.1	1	1	0.03	0.04	0.04	0.3	10	1	565.68	0.014
50	0.9	0.01	1	1	0.03	0.04	0.04	0.5	10	1	1504.8	0.0238
50	0.9	0.1	1	1	0.03	0.04	0.04	0.6	10	1	1525.5	0.0258
50	0.7	0.1	1	1	0.03	0.04	0.04	0.1	10	1	583.01	0.0184
50	0.8	0.9	1	1	0.03	0.04	0.2	0.9	10	1	1264.7	0.0327
50	0.7	0.9	1	1	0.03	0.04	0.2	0.4	10	1	1225.4	0.0534
50	0.8	0.9	1	1	0.03	0.04	0.2	0.7	10	1	1273.4	0.0315
50	0.8	0.9	1	1	0.03	0.04	0.04	0.2	10	1	1174.4	0.0211
50	0.8	0.9	1	1	0.03	0.04	0.04	0.5	10	1	1211.5	0.0184
50	0.9	0.7	1	1	0.03	0.04	0.2	0.6	10	1	1422.2	0.0048
50	0.8	0.7	1	1	0.03	0.04	0.2	0.3	10	1	873.89	0.0124
50	0.7	0.3	1	1	0.03	0.04	0.04	0.3	10	1	604.28	0.0171
50	0.8	0.9	1	1	0.03	0.04	0.2	0	10	1	1347.3	0.04
50	0.7	0.3	1	1	0.03	0.04	0.2	0.1	10	1	551.06	0.0092
50	0.8	0.9	1	1	0.03	0.04	0.2	0.5	10	1	1264.5	0.0344
50	0.6	0.6	1	1	0.03	0.04	0.2	0.2	10	1	523.91	0.0191
50	0.7	0.99	1	1	0.03	0.04	0.04	0.9	10	1	1559.5	0.0052
50	0.8	0.9	1	1	0.03	0.04	0.2	0.6	10	1	1299.3	0.0324
50	0.7	0.3	1	1	0.03	0.04	0.2	0	10	1	538.72	0.0075
50	0.8	0.9	1	1	0.03	0.04	0.2	0.3	10	1	1369.9	0.0385
50	0.7	0.3	1	1	0.03	0.04	0.04	0.1	10	1	622.78	0.0178
50	0.9	0.8	1	1	0.03	0.04	0.04	0.1	10	1	1680.8	0.0165
50	0.6	0.4	1	1	0.03	0.04	0.2	0.5	10	1	463.62	0.0115
50	0.6	0.4	1	1	0.03	0.04	0.2	0.3	10	1	450.3	0.0144
50	0.9	0.7	1	1	0.03	0.04	0.2	0.8	10	1	1408	0.0066
50	0.7	0.1	1	1	0.03	0.04	0.04	0.9	10	1	591.92	0.0197
50	0.7	0.01	1	1	0.03	0.04	0.2	0.3	10	1	485.12	0.0062
50	0.6	0.4	1	1	0.03	0.04	0.2	0.2	10	1	465.79	0.0131
50	0.7	0.3	1	1	0.03	0.04	0.2	0.2	10	1	540.18	0.0081
50	0.7	0.01	1	1	0.03	0.04	0.2	0.8	10	1	522.25	0.0085
50	0.9	0.8	1	1	0.03	0.04	0.04	0.4	10	1	1741.4	0.021
50	0.7	0.3	1	1	0.03	0.04	0.04	0	10	1	573.4	0.0152
50	0.7	0.9	1	1	0.03	0.04	0.04	0.2	10	1	992.66	0.0247
50	0.7	0.2	1	1	0.03	0.04	0.2	0	10	1	519.11	0.0069
50	0.7	0.01	1	1	0.03	0.04	0.04	0.4	10	1	566.42	0.0154
50	0.6	0.4	1	1	0.03	0.04	0.04	0.4	10	1	499.84	0.0202
50	0.6	0.5	1	1	0.03	0.04	0.04	0.4	10	1	486.16	0.0185
50	0.6	0.5	1	1	0.03	0.04	0.2	0.4	10	1	515.84	0.0177
50	0.6	0.5	1	1	0.03	0.04	0.04	0.3	10	1	486.18	0.0175
50	0.8	0.9	1	1	0.03	0.04	0.2	0.1	10	1	1362.4	0.0421
50	0.9	0.7	1	1	0.03	0.04	0.04	0.7	10	1	1773.3	0.0245
50	0.6	0.4	1	1	0.03	0.04	0.04	0.3	10	1	493.15	0.0175
50	0.6	0.4	1	1	0.03	0.04	0.04	0.2	10	1	473.1	0.0157
50	0.7	0.2	1	1	0.03	0.04	0.2	0.8	10	1	536.58	0.0096
50	0.6	0.6	1	1	0.03	0.04	0.04	0.5	10	1	529	0.02
50	0.7	0.1	1	1	0.03	0.04	0.2	0.2	10	1	538.88	0.0077
50	0.9	0.2	1	1	0.03	0.04	0.04	0.2	10	1	1523.9	0.0172
50	0.6	0.7	1	1	0.03	0.04	0.04	0	10	1	583.27	0.0209
50	0.6	0.9	1	1	0.03	0.04	0.04	0.6	10	1	730.25	0.0161
50	0.6	0.7	1	1	0.03	0.04	0.2	0.3	10	1	586.16	0.0262
50	0.6	0.5	1	1	0.03	0.04	0.04	0.5	10	1	509.49	0.0191
50	0.6	0.2	1	1	0.03	0.04	0.2	0	10	1	448.02	0.0105
50	0.6	0.3	1	1	0.03	0.04	0.2	0.6	10	1	460.69	0.0136
50	0.8	0.9	1	1	0.03	0.04	0.2	0.4	10	1	1460.4	0.0422
50	0.6	0.2	1	1	0.03	0.04	0.2	0.2	10	1	436.82	0.0137
50	0.6	0.6	1	1	0.03	0.04	0.2	0.9	10	1	533.17	0.0206
50	0.6	0.2	1	1	0.03	0.04	0.2	0.1	10	1	442.01	0.0096
50	0.6	0.5	1	1	0.03	0.04	0.04	0.8	10	1	513.02	0.0214
50	0.9	0.4	1	1	0.03	0.04	0.04	0.6	10	1	1604.6	0.0238
50	0.7	0.99	1	1	0.03	0.04	0.04	0.8	10	1	1741.2	0.006
50	0.6	0.9	1	1	0.03	0.04	0.04	0.7	10	1	766.24	0.0168
50	0.6	0.5	1	1	0.03	0.04	0.2	0.2	10	1	496.96	0.0162
50	0.9	0.1	1	1	0.03	0.04	0.04	0.1	10	1	1385.5	0.0124
50	0.6	0.3	1	1	0.03	0.04	0.2	0.4	10	1	437.88	0.0134
50	0.9	0.4	1	1	0.03	0.04	0.2	0.3	10	1	1215.8	0.0015
50	0.6	0.2	1	1	0.03	0.04	0.2	0.7	10	1	438.18	0.0117
50	0.9	0.01	1	1	0.03	0.04	0.2	0	10	1	1035.9	0.0006
50	0.6	0.2	1	1	0.03	0.04	0.04	0.1	10	1	457.86	0.0188
50	0.8	0.9	1	1	0.03	0.04	0.2	0.2	10	1	1434.4	0.0421
50	0.6	0.3	1	1	0.03	0.04	0.04	0.6	10	1	496.38	0.0195
50	0.6	0.5	1	1	0.03	0.04	0.2	0.3	10	1	514.22	0.0176
50	0.7	0.1	1	1	0.03	0.04	0.04	0.6	10	1	576.72	0.0174
50	0.9	0.1	1	1	0.03	0.04	0.2	0.9	10	1	1225	0.0033
50	0.6	0.3	1	1	0.03	0.04	0.2	0.9	10	1	437.07	0.0115
50	0.9	0.7	1	1	0.03	0.04	0.04	0.8	10	1	1722.8	0.0268
50	0.6	0.2	1	1	0.03	0.04	0.04	0.2	10	1	482.94	0.0206
50	0.9	0.3	1	1	0.03	0.04	0.2	0.2	10	1	1106.2	0.0014
50	0.6	0.2	1	1	0.03	0.04	0.2	0.8	10	1	456.44	0.0108
50	0.6	0.4	1	1	0.03	0.04	0.2	0.9	10	1	466.33	0.0152
50	0.9	0.3	1	1	0.03	0.04	0.2	0	10	1	1110.3	0.0014
50	0.9	0.8	1	1	0.03	0.04	0.2	0.4	10	1	1476.5	0.009
50	0.7	0.3	1	1	0.03	0.04	0.2	0.4	10	1	538.87	0.0089
50	0.7	0.01	1	1	0.03	0.04	0.04	0.1	10	1	564.66	0.0149
50	0.8	0.99	1	1	0.03	0.04	0.04	0.9	10	1	1945.2	0.0061
50	0.6	0.6	1	1	0.03	0.04	0.2	0.1	10	1	520.12	0.0209
50	0.7	0.9	1	1	0.03	0.04	0.2	0.2	10	1	1212.5	0.0557
50	0.9	0.2	1	1	0.03	0.04	0.04	0.9	10	1	1556.7	0.0325
50	0.6	0.6	1	1	0.03	0.04	0.2	0	10	1	526.04	0.0207
50	0.6	0.01	1	1	0.03	0.04	0.04	0.2	10	1	463.61	0.017
50	0.9	0.8	1	1	0.03	0.04	0.04	0.3	10	1	1677.3	0.0172
50	0.6	0.6	1	1	0.03	0.04	0.04	0.1	10	1	537.05	0.0218
50	0.6	0.7	1	1	0.03	0.04	0.04	0.1	10	1	569.99	0.0224
50	0.9	0.2	1	1	0.03	0.04	0.2	0.4	10	1	1125.4	0.0019
50	0.6	0.2	1	1	0.03	0.04	0.04	0.7	10	1	484.62	0.0189
50	0.9	0.01	1	1	0.03	0.04	0.2	0.7	10	1	1195.1	0.0027
50	0.6	0.2	1	1	0.03	0.04	0.04	0.6	10	1	460.37	0.0183
50	0.6	0.6	1	1	0.03	0.04	0.04	0.2	10	1	556.8	0.0198
50	0.9	0.2	1	1	0.03	0.04	0.2	0.3	10	1	1133.3	0.0009
50	0.7	0.2	1	1	0.03	0.04	0.04	0.4	10	1	576	0.0168
50	0.6	0.8	1	1	0.03	0.04	0.04	0.4	10	1	631.61	0.019
50	0.9	0.1	1	1	0.03	0.04	0.2	0.7	10	1	1201.3	0.0025
50	0.6	0.4	1	1	0.03	0.04	0.2	0.4	10	1	471.69	0.0141
50	0.6	0.8	1	1	0.03	0.04	0.04	0.2	10	1	620.34	0.0212
50	0.6	0.5	1	1	0.03	0.04	0.04	0	10	1	490.1	0.0164
50	0.6	0.4	1	1	0.03	0.04	0.2	0	10	1	452.76	0.0126
50	0.6	0.9	1	1	0.03	0.04	0.04	0.8	10	1	691.4	0.0128
50	0.7	0.1	1	1	0.03	0.04	0.2	0.1	10	1	514.5	0.0066
50	0.7	0.01	1	1	0.03	0.04	0.04	0.9	10	1	598.4	0.0211
50	0.6	0.99	1	1	0.03	0.04	0.04	0.8	10	1	1343.3	0.0054
50	0.9	0.3	1	1	0.03	0.04	0.04	0.1	10	1	1469.3	0.0142
50	0.6	0.2	1	1	0.03	0.04	0.2	0.5	10	1	433.27	0.0142
50	0.9	0.3	1	1	0.03	0.04	0.2	0.1	10	1	1150.2	0.0019
50	0.6	0.7	1	1	0.03	0.04	0.2	0.2	10	1	594.19	0.0278
50	0.7	0.01	1	1	0.03	0.04	0.04	0.5	10	1	560.27	0.0167
50	0.9	0.1	1	1	0.03	0.04	0.2	0.8	10	1	1161	0.0037
50	0.6	0.4	1	1	0.03	0.04	0.2	0.1	10	1	486.87	0.0131
50	0.6	0.7	1	1	0.03	0.04	0.04	0.3	10	1	597.46	0.0233
50	0.9	0.5	1	1	0.03	0.04	0.2	0.1	10	1	1232.2	0.002
50	0.8	0.99	1	1	0.03	0.04	0.04	0.8	10	1	2035.4	0.0084
50	0.9	0.4	1	1	0.03	0.04	0.2	0	10	1	1140.3	0.0014
50	0.6	0.4	1	1	0.03	0.04	0.04	0.5	10	1	506.96	0.0209
50	0.6	0.8	1	1	0.03	0.04	0.04	0.9	10	1	623.11	0.019
50	0.6	0.8	1	1	0.03	0.04	0.04	0.7	10	1	631.98	0.0214
50	0.6	0.9	1	1	0.03	0.04	0.04	0.3	10	1	835.5	0.023
50	0.9	0.1	1	1	0.03	0.04	0.2	0.4	10	1	1142.7	0.0015
50	0.9	0.3	1	1	0.03	0.04	0.2	0.5	10	1	1138.7	0.002
50	0.6	0.1	1	1	0.03	0.04	0.04	0	10	1	447.28	0.014
50	0.7	0.99	1	1	0.03	0.04	0.04	0.7	10	1	1910.8	0.0096
50	0.7	0.2	1	1	0.03	0.04	0.2	0.4	10	1	539.1	0.0076
50	0.6	0.2	1	1	0.03	0.04	0.04	0.8	10	1	464.29	0.0178
50	0.6	0.5	1	1	0.03	0.04	0.04	0.7	10	1	511.16	0.019
50	0.6	0.5	1	1	0.03	0.04	0.2	0.7	10	1	484.31	0.0168
50	0.7	0.3	1	1	0.03	0.04	0.2	0.3	10	1	538.33	0.0092
50	0.9	0.2	1	1	0.03	0.04	0.2	0.5	10	1	1146.3	0.002
50	0.9	0.5	1	1	0.03	0.04	0.2	0	10	1	1210.5	0.0023
50	0.9	0.01	1	1	0.03	0.04	0.2	0.2	10	1	1051.6	0.0007
50	0.6	0.6	1	1	0.03	0.04	0.2	0.6	10	1	521.22	0.0194
50	0.6	0.8	1	1	0.03	0.04	0.04	0.5	10	1	622.65	0.0216
50	0.6	0.8	1	1	0.03	0.04	0.2	0.2	10	1	705.69	0.0377
50	0.6	0.8	1	1	0.03	0.04	0.04	0.6	10	1	644.84	0.0201
50	0.8	0.8	1	1	0.03	0.04	0.2	0.8	10	1	1019.9	0.0211
50	0.6	0.9	1	1	0.03	0.04	0.04	0.9	10	1	677.21	0.0131
50	0.7	0.01	1	1	0.03	0.04	0.2	0.6	10	1	542.11	0.008
50	0.9	0.2	1	1	0.03	0.04	0.2	0.6	10	1	1195.2	0.0026
50	0.6	0.5	1	1	0.03	0.04	0.2	0.8	10	1	505.38	0.0164
50	0.6	0.8	1	1	0.03	0.04	0.04	0	10	1	668.08	0.024
50	0.7	0.3	1	1	0.03	0.04	0.04	0.2	10	1	606.56	0.017
50	0.8	0.8	1	1	0.03	0.04	0.04	0.9	10	1	1047.7	0.0225
50	0.6	0.8	1	1	0.03	0.04	0.04	0.8	10	1	604.07	0.0187
50	0.6	0.8	1	1	0.03	0.04	0.2	0.5	10	1	693.08	0.0348
50	0.7	0.01	1	1	0.03	0.04	0.04	0.8	10	1	582.22	0.0183
50	0.6	0.4	1	1	0.03	0.04	0.04	0.1	10	1	472.25	0.0185
50	0.9	0.4	1	1	0.03	0.04	0.2	0.1	10	1	1153.5	0.0017
50	0.6	0.7	1	1	0.03	0.04	0.04	0.4	10	1	561.31	0.0212
50	0.6	0.8	1	1	0.03	0.04	0.2	0.7	10	1	710.27	0.038
50	0.6	0.8	1	1	0.03	0.04	0.04	0.1	10	1	669.68	0.0238
50	0.9	0.1	1	1	0.03	0.04	0.2	0.2	10	1	1121.8	0.0014
50	0.7	0.3	1	1	0.03	0.04	0.2	0.6	10	1	551.71	0.0102
50	0.7	0.2	1	1	0.03	0.04	0.2	0.1	10	1	532.21	0.0075
50	0.9	0.3	1	1	0.03	0.04	0.2	0.3	10	1	1173.8	0.0016
50	0.6	0.5	1	1	0.03	0.04	0.04	0.6	10	1	502.57	0.0191
50	0.6	0.1	1	1	0.03	0.04	0.04	0.9	10	1	478.08	0.021
50	0.6	0.8	1	1	0.03	0.04	0.04	0.3	10	1	674.79	0.023
50	0.6	0.6	1	1	0.03	0.04	0.04	0.6	10	1	531.26	0.0213
50	0.9	0.01	1	1	0.03	0.04	0.2	0.3	10	1	1069.2	0.002
50	0.7	0.1	1	1	0.03	0.04	0.2	0.9	10	1	521.88	0.0091
50	0.9	0.01	1	1	0.03	0.04	0.2	0.6	10	1	1120.4	0.0023
50	0.9	0.3	1	1	0.03	0.04	0.2	0.4	10	1	1202.2	0.0022
50	0.7	0.3	1	1	0.03	0.04	0.04	0.5	10	1	612.6	0.021
50	0.9	0.3	1	1	0.03	0.04	0.2	0.7	10	1	1183.3	0.0031
50	0.9	0.7	1	1	0.03	0.04	0.04	0.6	10	1	1690.4	0.0254
50	0.6	0.5	1	1	0.03	0.04	0.2	0.1	10	1	497.86	0.0177
50	0.6	0.1	1	1	0.03	0.04	0.04	0.5	10	1	460.6	0.0195
50	0.7	0.01	1	1	0.03	0.04	0.2	0.7	10	1	529.19	0.0065
50	0.6	0.7	1	1	0.03	0.04	0.04	0.9	10	1	541.61	0.0193
50	0.6	0.6	1	1	0.03	0.04	0.04	0.7	10	1	548.11	0.0183
50	0.7	0.1	1	1	0.03	0.04	0.2	0.6	10	1	527.52	0.0091
50	0.9	0.3	1	1	0.03	0.04	0.2	0.8	10	1	1226.8	0.003
50	0.6	0.7	1	1	0.03	0.04	0.2	0.1	10	1	590.95	0.0247
50	0.7	0.2	1	1	0.03	0.04	0.2	0.2	10	1	523.98	0.0077
50	0.6	0.4	1	1	0.03	0.04	0.04	0	10	1	504.23	0.0182
50	0.6	0.8	1	1	0.03	0.04	0.2	0.9	10	1	705.22	0.0328
50	0.6	0.5	1	1	0.03	0.04	0.2	0.6	10	1	493.18	0.0174
50	0.9	0.5	1	1	0.03	0.04	0.2	0.6	10	1	1241.3	0.0027
50	0.9	0.01	1	1	0.03	0.04	0.2	0.5	10	1	1150.6	0.0028
50	0.6	0.7	1	1	0.03	0.04	0.04	0.2	10	1	576.67	0.0212
50	0.6	0.9	1	1	0.03	0.04	0.04	0.5	10	1	749.68	0.0181
50	0.6	0.6	1	1	0.03	0.04	0.2	0.5	10	1	524.99	0.0214
50	0.6	0.7	1	1	0.03	0.04	0.04	0.8	10	1	562.36	0.0192
50	0.6	0.5	1	1	0.03	0.04	0.04	0.2	10	1	536.01	0.0216
50	0.9	0.3	1	1	0.03	0.04	0.2	0.6	10	1	1179	0.0026
50	0.6	0.5	1	1	0.03	0.04	0.2	0.9	10	1	488.82	0.0165
50	0.6	0.9	1	1	0.03	0.04	0.04	0.2	10	1	826.05	0.025
50	0.6	0.6	1	1	0.03	0.04	0.2	0.7	10	1	526.18	0.0192
50	0.9	0.5	1	1	0.03	0.04	0.2	0.3	10	1	1232.9	0.0024
50	0.6	0.5	1	1	0.03	0.04	0.04	0.1	10	1	529.97	0.0214
50	0.7	0.01	1	1	0.03	0.04	0.04	0.6	10	1	590.85	0.0175
50	0.7	0.1	1	1	0.03	0.04	0.04	0.7	10	1	590.61	0.0183
50	0.6	0.8	1	1	0.03	0.04	0.2	0	10	1	737.57	0.0364
50	0.9	0.01	1	1	0.03	0.04	0.04	0.1	10	1	1316.6	0.0109
50	0.6	0.5	1	1	0.03	0.04	0.2	0.5	10	1	513.28	0.0176
50	0.7	0.3	1	1	0.03	0.04	0.2	0.7	10	1	540.3	0.0079
50	0.6	0.9	1	1	0.03	0.04	0.2	0	10	1	1156.4	0.0695
50	0.7	0.2	1	1	0.03	0.04	0.2	0.5	10	1	544.13	0.0075
50	0.7	0.1	1	1	0.03	0.04	0.2	0.8	10	1	541.07	0.0084
50	0.7	0.3	1	1	0.03	0.04	0.2	0.9	10	1	558.73	0.009
50	0.7	0.3	1	1	0.03	0.04	0.04	0.6	10	1	587.2	0.0168
50	0.6	0.3	1	1	0.03	0.04	0.2	0.7	10	1	462.25	0.014
50	0.6	0.1	1	1	0.03	0.04	0.2	0	10	1	432.3	0.0113
50	0.6	0.7	1	1	0.03	0.04	0.2	0.7	10	1	608.51	0.0264
50	0.7	0.1	1	1	0.03	0.04	0.2	0.3	10	1	499.26	0.0063
50	0.6	0.7	1	1	0.03	0.04	0.04	0.7	10	1	562.75	0.0219
50	0.6	0.1	1	1	0.03	0.04	0.2	0.7	10	1	435.21	0.013
50	0.6	0.3	1	1	0.03	0.04	0.2	0.1	10	1	439.37	0.0107
50	0.6	0.2	1	1	0.03	0.04	0.2	0.6	10	1	445.84	0.0122
50	0.9	0.5	1	1	0.03	0.04	0.2	0.2	10	1	1225.3	0.0017
50	0.9	0.4	1	1	0.03	0.04	0.2	0.7	10	1	1219.5	0.0031
50	0.9	0.2	1	1	0.03	0.04	0.2	0.9	10	1	1220.1	0.0034
50	0.7	0.1	1	1	0.03	0.04	0.2	0.4	10	1	530.59	0.0072
50	0.7	0.2	1	1	0.03	0.04	0.04	0.2	10	1	603.13	0.0177
50	0.7	0.2	1	1	0.03	0.04	0.04	0.8	10	1	599.58	0.0201
50	0.6	0.8	1	1	0.03	0.04	0.2	0.4	10	1	784.94	0.0412
50	0.7	0.2	1	1	0.03	0.04	0.2	0.3	10	1	557.04	0.0083
50	0.7	0.3	1	1	0.03	0.04	0.04	0.7	10	1	618.56	0.0185
50	0.9	0.2	1	1	0.03	0.04	0.2	0.7	10	1	1214.7	0.0025
50	0.9	0.1	1	1	0.03	0.04	0.2	0.5	10	1	1169.7	0.0027
50	0.7	0.2	1	1	0.03	0.04	0.2	0.6	10	1	541.27	0.0081
50	0.6	0.8	1	1	0.03	0.04	0.2	0.1	10	1	738.21	0.0373
50	0.6	0.8	1	1	0.03	0.04	0.2	0.3	10	1	750.62	0.0392
50	0.7	0.3	1	1	0.03	0.04	0.04	0.4	10	1	619.55	0.0162
50	0.6	0.1	1	1	0.03	0.04	0.2	0.1	10	1	444.48	0.0116
50	0.9	0.5	1	1	0.03	0.04	0.2	0.7	10	1	1294.8	0.0032
50	0.6	0.1	1	1	0.03	0.04	0.04	0.1	10	1	455.44	0.0164
50	0.6	0.8	1	1	0.03	0.04	0.2	0.6	10	1	746.33	0.0373
50	0.7	0.3	1	1	0.03	0.04	0.2	0.8	10	1	571.47	0.009
50	0.6	0.3	1	1	0.03	0.04	0.04	0.7	10	1	492.57	0.0197
50	0.9	0.01	1	1	0.03	0.04	0.2	0.1	10	1	1071.6	0.0011
50	0.7	0.2	1	1	0.03	0.04	0.04	0.9	10	1	597.12	0.0178
50	0.6	0.01	1	1	0.03	0.04	0.2	0.2	10	1	413.91	0.0094
50	0.9	0.4	1	1	0.03	0.04	0.2	0.6	10	1	1236.9	0.0034
50	0.9	0.4	1	1	0.03	0.04	0.2	0.4	10	1	1222.6	0.0024
50	0.7	0.2	1	1	0.03	0.04	0.04	0.5	10	1	591.87	0.0182
50	0.6	0.7	1	1	0.03	0.04	0.2	0	10	1	619.59	0.0266
50	0.7	0.01	1	1	0.03	0.04	0.2	0.1	10	1	515.9	0.0068
50	0.6	0.4	1	1	0.03	0.04	0.2	0.7	10	1	465.06	0.0159
50	0.6	0.1	1	1	0.03	0.04	0.2	0.6	10	1	427.5	0.0124
50	0.6	0.6	1	1	0.03	0.04	0.2	0.4	10	1	526.85	0.0194
50	0.6	0.9	1	1	0.03	0.04	0.04	0.4	10	1	793.15	0.0217
50	0.6	0.2	1	1	0.03	0.04	0.2	0.9	10	1	441.4	0.0116
50	0.7	0.1	1	1	0.03	0.04	0.2	0.7	10	1	536.33	0.0076
50	0.6	0.9	1	1	0.03	0.04	0.2	0.5	10	1	1037.3	0.0492
50	0.6	0.7	1	1	0.03	0.04	0.2	0.8	10	1	614.04	0.0277
50	0.6	0.3	1	1	0.03	0.04	0.04	0.8	10	1	473.62	0.0173
50	0.7	0.1	1	1	0.03	0.04	0.2	0.5	10	1	528.41	0.0078
50	0.6	0.3	1	1	0.03	0.04	0.04	0.2	10	1	453.4	0.0198
50	0.7	0.01	1	1	0.03	0.04	0.2	0.5	10	1	521.67	0.0075
50	0.6	0.3	1	1	0.03	0.04	0.04	0.4	10	1	462.54	0.0177
50	0.6	0.3	1	1	0.03	0.04	0.2	0	10	1	448.46	0.0136
50	0.6	0.3	1	1	0.03	0.04	0.2	0.2	10	1	464.92	0.0113
50	0.7	0.01	1	1	0.03	0.04	0.2	0.4	10	1	510.69	0.0059
50	0.7	0.2	1	1	0.03	0.04	0.04	0.1	10	1	589.33	0.0134
50	0.6	0.1	1	1	0.03	0.04	0.2	0.8	10	1	447.79	0.0126
50	0.6	0.01	1	1	0.03	0.04	0.2	0	10	1	423.48	0.0098
50	0.7	0.01	1	1	0.03	0.04	0.2	0.2	10	1	524.35	0.0066
50	0.6	0.4	1	1	0.03	0.04	0.2	0.8	10	1	456.01	0.0125
50	0.5	0.9	1	1	0.03	0.04	0.04	0.8	10	1	618.29	0.0119
50	0.6	0.01	1	1	0.03	0.04	0.2	0.1	10	1	414.6	0.0108
50	0.6	0.1	1	1	0.03	0.04	0.04	0.3	10	1	451.19	0.0181
50	0.7	0.2	1	1	0.03	0.04	0.2	0.9	10	1	550.56	0.0088
50	0.6	0.1	1	1	0.03	0.04	0.04	0.7	10	1	465.8	0.0183
50	0.7	0.1	1	1	0.03	0.04	0.04	0.8	10	1	584.62	0.0187
50	0.6	0.4	1	1	0.03	0.04	0.04	0.8	10	1	487.98	0.0189
50	0.6	0.4	1	1	0.03	0.04	0.04	0.9	10	1	493.81	0.0185
50	0.6	0.3	1	1	0.03	0.04	0.2	0.5	10	1	453.26	0.0125
50	0.6	0.4	1	1	0.03	0.04	0.2	0.6	10	1	483.01	0.0138
50	0.6	0.2	1	1	0.03	0.04	0.04	0.9	10	1	480.08	0.0187
50	0.9	0.4	1	1	0.03	0.04	0.2	0.5	10	1	1251	0.0026
50	0.6	0.3	1	1	0.03	0.04	0.04	0.1	10	1	484.45	0.0189
50	0.7	0.01	1	1	0.03	0.04	0.2	0	10	1	524.53	0.008
50	0.7	0.01	1	1	0.03	0.04	0.04	0.7	10	1	592.25	0.0194
50	0.6	0.3	1	1	0.03	0.04	0.04	0.5	10	1	465.81	0.0193
50	0.9	0.2	1	1	0.03	0.04	0.2	0.8	10	1	1187.6	0.0032
50	0.9	0.5	1	1	0.03	0.04	0.2	0.8	10	1	1291.7	0.0032
50	0.9	0.7	1	1	0.03	0.04	0.2	0.7	10	1	1382.8	0.0054
50	0.9	0.6	1	1	0.03	0.04	0.2	0.5	10	1	1323.2	0.004
50	0.7	0.01	1	1	0.03	0.04	0.04	0.2	10	1	578.8	0.0178
50	0.7	0.99	1	1	0.03	0.04	0.04	0.6	10	1	2013.5	0.0101
50	0.6	0.4	1	1	0.03	0.04	0.04	0.6	10	1	499.48	0.0185
50	0.6	0.6	1	1	0.03	0.04	0.04	0.9	10	1	527.93	0.0199
50	0.7	0.2	1	1	0.03	0.04	0.04	0.3	10	1	605.61	0.0175
50	0.6	0.3	1	1	0.03	0.04	0.04	0.3	10	1	488.37	0.0209
50	0.6	0.01	1	1	0.03	0.04	0.04	0.1	10	1	454.1	0.0202
50	0.6	0.8	1	1	0.03	0.04	0.2	0.8	10	1	730.63	0.0364
50	0.6	0.01	1	1	0.03	0.04	0.2	0.4	10	1	440.99	0.0101
50	0.6	0.3	1	1	0.03	0.04	0.2	0.3	10	1	492.88	0.0151
50	0.7	0.01	1	1	0.03	0.04	0.04	0	10	1	566.03	0.0169
50	0.9	0.3	1	1	0.03	0.04	0.2	0.9	10	1	1234.8	0.0032
50	0.9	0.01	1	1	0.03	0.04	0.04	0	10	1	1307	0.0112
50	0.7	0.1	1	1	0.03	0.04	0.04	0.4	10	1	587.46	0.0185
50	0.6	0.5	1	1	0.03	0.04	0.04	0.9	10	1	515.16	0.0221
50	0.6	0.4	1	1	0.03	0.04	0.04	0.7	10	1	510.46	0.0198
50	0.6	0.1	1	1	0.03	0.04	0.04	0.6	10	1	471.51	0.0199
50	0.7	0.01	1	1	0.03	0.04	0.04	0.3	10	1	564.13	0.0152
50	0.7	0.2	1	1	0.03	0.04	0.04	0.6	10	1	591.71	0.02
50	0.7	0.1	1	1	0.03	0.04	0.04	0	10	1	614.04	0.0197
50	0.6	0.1	1	1	0.03	0.04	0.2	0.5	10	1	451.61	0.0124
50	0.7	0.2	1	1	0.03	0.04	0.04	0.7	10	1	593.77	0.0187
50	0.9	0.4	1	1	0.03	0.04	0.2	0.9	10	1	1283.3	0.0041
50	0.6	0.01	1	1	0.03	0.04	0.04	0.5	10	1	462.22	0.0194
50	0.7	0.3	1	1	0.03	0.04	0.04	0.9	10	1	633.23	0.0224
50	0.6	0.2	1	1	0.03	0.04	0.04	0	10	1	485.02	0.02
50	0.6	0.1	1	1	0.03	0.04	0.04	0.8	10	1	477.03	0.0193
50	0.9	0.6	1	1	0.03	0.04	0.2	0.7	10	1	1320.6	0.004
50	0.6	0.6	1	1	0.03	0.04	0.2	0.8	10	1	539.56	0.0182
50	0.6	0.01	1	1	0.03	0.04	0.04	0.4	10	1	454.08	0.0181
50	0.6	0.6	1	1	0.03	0.04	0.04	0.4	10	1	532.91	0.0197
50	0.6	0.01	1	1	0.03	0.04	0.2	0.5	10	1	436.97	0.0105
50	0.7	0.2	1	1	0.03	0.04	0.04	0	10	1	608.89	0.0179
50	0.7	0.3	1	1	0.03	0.04	0.04	0.8	10	1	638.21	0.0199
50	0.6	0.9	1	1	0.03	0.04	0.2	0.3	10	1	1155.4	0.0658
50	0.6	0.1	1	1	0.03	0.04	0.2	0.9	10	1	416.6	0.012
50	0.9	0.4	1	1	0.03	0.04	0.2	0.2	10	1	1175.8	0.0014
50	0.5	0.9	1	1	0.03	0.04	0.04	0.5	10	1	684.16	0.0194
50	0.6	0.6	1	1	0.03	0.04	0.04	0.8	10	1	531.88	0.0194
50	0.6	0.2	1	1	0.03	0.04	0.2	0.3	10	1	429.6	0.0126
50	0.6	0.2	1	1	0.03	0.04	0.04	0.5	10	1	458.31	0.0181
50	0.6	0.01	1	1	0.03	0.04	0.2	0.7	10	1	417.83	0.0114
50	0.9	0.01	1	1	0.03	0.04	0.2	0.9	10	1	1201.3	0.0032
50	0.9	0.6	1	1	0.03	0.04	0.2	0.1	10	1	1253.1	0.0024
50	0.6	0.01	1	1	0.03	0.04	0.2	0.6	10	1	438.6	0.0112
50	0.7	0.1	1	1	0.03	0.04	0.04	0.2	10	1	591.03	0.0163
50	0.9	0.7	1	1	0.03	0.04	0.2	0.3	10	1	1410.5	0.0044
50	0.6	0.2	1	1	0.03	0.04	0.2	0.4	10	1	447.17	0.0121
50	0.9	0.2	1	1	0.03	0.04	0.04	0	10	1	1330.3	0.0113
50	0.7	0.1	1	1	0.03	0.04	0.04	0.5	10	1	586.75	0.0181
50	0.6	0.01	1	1	0.03	0.04	0.04	0.6	10	1	453.45	0.0185
50	0.7	0.01	1	1	0.03	0.04	0.2	0.9	10	1	519.28	0.0077
50	0.6	0.7	1	1	0.03	0.04	0.04	0.5	10	1	560.45	0.021
50	0.9	0.7	1	1	0.03	0.04	0.2	0.2	10	1	1380.9	0.0051
50	0.9	0.8	1	1	0.03	0.04	0.2	0.3	10	1	1483.3	0.0076
50	0.6	0.3	1	1	0.03	0.04	0.04	0	10	1	489.65	0.0194
50	0.6	0.7	1	1	0.03	0.04	0.2	0.5	10	1	593.84	0.0253
50	0.6	0.6	1	1	0.03	0.04	0.04	0.3	10	1	548.63	0.0208
50	0.6	0.1	1	1	0.03	0.04	0.2	0.2	10	1	430.83	0.0114
50	0.6	0.1	1	1	0.03	0.04	0.2	0.4	10	1	420.43	0.0109
50	0.6	0.01	1	1	0.03	0.04	0.04	0.3	10	1	462.79	0.0179
50	0.6	0.01	1	1	0.03	0.04	0.2	0.9	10	1	437.58	0.0101
50	0.5	0.5	1	1	0.03	0.04	0.04	0.2	10	1	413.58	0.0209
50	0.9	0.8	1	1	0.03	0.04	0.2	0.5	10	1	1499.2	0.0086
50	0.6	0.3	1	1	0.03	0.04	0.2	0.8	10	1	439.02	0.0119
50	0.6	0.1	1	1	0.03	0.04	0.04	0.4	10	1	473.33	0.0197
50	0.6	0.5	1	1	0.03	0.04	0.2	0	10	1	483.34	0.0158
50	0.9	0.6	1	1	0.03	0.04	0.2	0.9	10	1	1372.1	0.0042
50	0.6	0.7	1	1	0.03	0.04	0.04	0.6	10	1	601.56	0.0238
50	0.6	0.6	1	1	0.03	0.04	0.2	0.3	10	1	545.51	0.021
50	0.6	0.2	1	1	0.03	0.04	0.04	0.4	10	1	466.44	0.0174
50	0.6	0.01	1	1	0.03	0.04	0.04	0.9	10	1	460.73	0.0199
50	0.9	0.7	1	1	0.03	0.04	0.2	0.4	10	1	1405.4	0.0045
50	0.9	0.7	1	1	0.03	0.04	0.2	0.9	10	1	1447.8	0.0068
50	0.6	0.99	1	1	0.03	0.04	0.04	0.9	10	1	1117.6	0.0039
50	0.5	0.9	1	1	0.03	0.04	0.04	0.2	10	1	778.21	0.0262
50	0.5	0.9	1	1	0.03	0.04	0.04	0.4	10	1	746.89	0.0214
50	0.9	0.3	1	1	0.03	0.04	0.04	0	10	1	1428.9	0.0107
50	0.9	0.1	1	1	0.03	0.04	0.04	0	10	1	1398.5	0.0111
50	0.6	0.01	1	1	0.03	0.04	0.2	0.8	10	1	406.05	0.0095
50	0.6	0.7	1	1	0.03	0.04	0.2	0.4	10	1	587.87	0.0264
50	0.6	0.9	1	1	0.03	0.04	0.2	0.7	10	1	1134.8	0.0557
50	0.6	0.1	1	1	0.03	0.04	0.04	0.2	10	1	458.04	0.0176
50	0.5	0.5	1	1	0.03	0.04	0.2	0.1	10	1	422.32	0.0179
50	0.5	0.5	1	1	0.03	0.04	0.2	0.7	10	1	422.79	0.0205
50	0.5	0.5	1	1	0.03	0.04	0.2	0.3	10	1	435.58	0.0209
50	0.6	0.6	1	1	0.03	0.04	0.04	0	10	1	537.06	0.0211
50	0.6	0.01	1	1	0.03	0.04	0.04	0.7	10	1	468.74	0.0176
50	0.5	0.5	1	1	0.03	0.04	0.04	0.9	10	1	435.71	0.0197
50	0.5	0.4	1	1	0.03	0.04	0.04	0.8	10	1	410.29	0.0195
50	0.5	0.4	1	1	0.03	0.04	0.04	0.2	10	1	422.69	0.0202
50	0.5	0.6	1	1	0.03	0.04	0.2	0.8	10	1	472.81	0.0255
50	0.9	0.7	1	1	0.03	0.04	0.2	0	10	1	1425.9	0.0025
50	0.5	0.7	1	1	0.03	0.04	0.04	0.3	10	1	512.4	0.0253
50	0.9	0.3	1	1	0.03	0.04	0.04	0.2	10	1	1459	0.0155
50	0.9	0.7	1	1	0.03	0.04	0.2	0.1	10	1	1391.5	0.0029
50	0.9	0.2	1	1	0.03	0.04	0.04	0.1	10	1	1376.2	0.0112
50	0.6	0.9	1	1	0.03	0.04	0.2	0.8	10	1	1039.9	0.05
50	0.5	0.5	1	1	0.03	0.04	0.2	0.4	10	1	423.45	0.0177
50	0.5	0.3	1	1	0.03	0.04	0.2	0.2	10	1	386.43	0.0145
50	0.9	0.01	1	1	0.03	0.04	0.04	0.9	10	1	1567.9	0.035
50	0.5	0.5	1	1	0.03	0.04	0.04	0.7	10	1	459.09	0.0211
50	0.9	0.6	1	1	0.03	0.04	0.2	0.2	10	1	1218.6	0.0016
50	0.6	0.3	1	1	0.03	0.04	0.04	0.9	10	1	481.37	0.0186
50	0.9	0.9	1	1	0.03	0.04	0.2	0.8	10	1	1792.6	0.021
50	0.7	0.99	1	1	0.03	0.04	0.04	0.5	10	1	2246.1	0.0138
50	0.9	0.01	1	1	0.03	0.04	0.04	0.3	10	1	1391.1	0.0186
50	0.6	0.2	1	1	0.03	0.04	0.04	0.3	10	1	474.19	0.0164
50	0.6	0.01	1	1	0.03	0.04	0.04	0	10	1	455.6	0.0172
50	0.5	0.5	1	1	0.03	0.04	0.04	0.3	10	1	430.82	0.0201
50	0.6	0.9	1	1	0.03	0.04	0.2	0.9	10	1	1007.7	0.046
50	0.5	0.5	1	1	0.03	0.04	0.04	0.5	10	1	429.1	0.0201
50	0.5	0.5	1	1	0.03	0.04	0.04	0.8	10	1	429.71	0.0199
50	0.9	0.4	1	1	0.03	0.04	0.04	0.1	10	1	1414.1	0.0145
50	0.6	0.7	1	1	0.03	0.04	0.2	0.6	10	1	614.12	0.0269
50	0.5	0.4	1	1	0.03	0.04	0.04	0.7	10	1	403.23	0.0174
50	0.6	0.01	1	1	0.03	0.04	0.04	0.8	10	1	455.35	0.0176
50	0.9	0.5	1	1	0.03	0.04	0.04	0	10	1	1486.1	0.0118
50	0.9	0.5	1	1	0.03	0.04	0.04	0.1	10	1	1537.4	0.0151
50	0.5	0.8	1	1	0.03	0.04	0.2	0	10	1	710.33	0.0483
50	0.5	0.5	1	1	0.03	0.04	0.2	0.2	10	1	423.67	0.019
50	0.6	0.7	1	1	0.03	0.04	0.2	0.9	10	1	595.87	0.0272
50	0.9	0.3	1	1	0.03	0.04	0.04	0.4	10	1	1463.7	0.0171
50	0.5	0.99	1	1	0.03	0.04	0.04	0.8	10	1	1200.9	0.0057
50	0.9	0.9	1	1	0.03	0.04	0.2	0.4	10	1	1820.9	0.019
50	0.9	0.1	1	1	0.03	0.04	0.04	0.8	10	1	1532.2	0.03
50	0.9	0.9	1	1	0.03	0.04	0.04	0.9	10	1	1858	0.0199
50	0.5	0.4	1	1	0.03	0.04	0.04	0.4	10	1	395.55	0.0177
50	0.5	0.5	1	1	0.03	0.04	0.04	0.4	10	1	419.33	0.0196
50	0.9	0.4	1	1	0.03	0.04	0.04	0	10	1	1432.7	0.0117
50	0.9	0.9	1	1	0.03	0.04	0.2	0.6	10	1	1784.3	0.0185
50	0.5	0.2	1	1	0.03	0.04	0.2	0.2	10	1	380.52	0.014
50	0.9	0.01	1	1	0.03	0.04	0.04	0.6	10	1	1396.6	0.025
50	0.5	0.1	1	1	0.03	0.04	0.2	0.1	10	1	354.27	0.0133
50	0.5	0.5	1	1	0.03	0.04	0.2	0.9	10	1	418.62	0.0181
50	0.5	0.4	1	1	0.03	0.04	0.2	0.2	10	1	392.32	0.0176
50	0.5	0.1	1	1	0.03	0.04	0.2	0.5	10	1	372.53	0.0121
50	0.5	0.4	1	1	0.03	0.04	0.04	0.5	10	1	415.96	0.019
50	0.9	0.8	1	1	0.03	0.04	0.2	0.9	10	1	1564	0.0111
50	0.5	0.6	1	1	0.03	0.04	0.04	0.4	10	1	453.27	0.0218
50	0.5	0.1	1	1	0.03	0.04	0.04	0.7	10	1	390.51	0.0176
50	0.6	0.9	1	1	0.03	0.04	0.2	0.6	10	1	1099.3	0.0562
50	0.9	0.6	1	1	0.03	0.04	0.2	0	10	1	1288.6	0.002
50	0.9	0.9	1	1	0.03	0.04	0.04	0.6	10	1	1873.2	0.0193
50	0.6	0.9	1	1	0.03	0.04	0.04	0.1	10	1	868.05	0.0249
50	0.9	0.9	1	1	0.03	0.04	0.2	0.5	10	1	1846.1	0.02
50	0.9	0.9	1	1	0.03	0.04	0.04	0.3	10	1	1856.2	0.0193
50	0.9	0.2	1	1	0.03	0.04	0.04	0.4	10	1	1456.9	0.021
50	0.5	0.01	1	1	0.03	0.04	0.2	0.1	10	1	349.6	0.0112
50	0.9	0.2	1	1	0.03	0.04	0.04	0.5	10	1	1466.7	0.0191
50	0.5	0.6	1	1	0.03	0.04	0.04	0.7	10	1	452.6	0.0192
50	0.9	0.5	1	1	0.03	0.04	0.04	0.2	10	1	1499.2	0.0143
50	0.9	0.9	1	1	0.03	0.04	0.2	0.2	10	1	1863.1	0.0184
50	0.9	0.8	1	1	0.03	0.04	0.2	0.7	10	1	1587.1	0.0104
50	0.5	0.4	1	1	0.03	0.04	0.2	0.8	10	1	424.21	0.0189
50	0.9	0.8	1	1	0.03	0.04	0.2	0.6	10	1	1587.9	0.0109
50	0.5	0.8	1	1	0.03	0.04	0.04	0.2	10	1	586.25	0.0238
50	0.5	0.9	1	1	0.03	0.04	0.2	0.8	10	1	982.96	0.0559
50	0.6	0.9	1	1	0.03	0.04	0.04	0	10	1	958.1	0.0299
50	0.5	0.3	1	1	0.03	0.04	0.04	0	10	1	408	0.0179
50	0.9	0.9	1	1	0.03	0.04	0.04	0.5	10	1	1890.1	0.0191
50	0.5	0.1	1	1	0.03	0.04	0.04	0.3	10	1	394.65	0.0199
50	0.5	0.6	1	1	0.03	0.04	0.2	0.7	10	1	473.31	0.0272
50	0.5	0.01	1	1	0.03	0.04	0.2	0.7	10	1	373.04	0.0136
50	0.5	0.7	1	1	0.03	0.04	0.04	0.2	10	1	494.37	0.0239
50	0.5	0.6	1	1	0.03	0.04	0.2	0.4	10	1	460.53	0.0245
50	0.6	0.9	1	1	0.03	0.04	0.2	0.2	10	1	1114.9	0.0643
50	0.9	0.9	1	1	0.03	0.04	0.2	0.9	10	1	1813.2	0.0198
50	0.9	0.3	1	1	0.03	0.04	0.04	0.6	10	1	1526.5	0.0277
50	0.9	0.9	1	1	0.03	0.04	0.04	0.8	10	1	1888	0.0205
50	0.9	0.3	1	1	0.03	0.04	0.04	0.3	10	1	1493.5	0.0163
50	0.5	0.3	1	1	0.03	0.04	0.04	0.3	10	1	409.57	0.0203
50	0.5	0.8	1	1	0.03	0.04	0.04	0.1	10	1	580.62	0.0257
50	0.5	0.8	1	1	0.03	0.04	0.2	0.2	10	1	658.72	0.0425
50	0.9	0.9	1	1	0.03	0.04	0.2	0.7	10	1	1870.2	0.0199
50	0.5	0.2	1	1	0.03	0.04	0.04	0.1	10	1	395.5	0.0173
50	0.5	0.1	1	1	0.03	0.04	0.04	0.1	10	1	388.73	0.018
50	0.9	0.7	1	1	0.03	0.04	0.04	0.3	10	1	1695.2	0.0187
50	0.9	0.6	1	1	0.03	0.04	0.04	0.6	10	1	1679.7	0.0236
50	0.9	0.4	1	1	0.03	0.04	0.04	0.5	10	1	1505	0.0191
50	0.5	0.1	1	1	0.03	0.04	0.2	0.7	10	1	355.34	0.013
50	0.9	0.5	1	1	0.03	0.04	0.04	0.4	10	1	1569.3	0.0205
50	0.9	0.6	1	1	0.03	0.04	0.04	0.7	10	1	1679.1	0.0272
50	0.5	0.5	1	1	0.03	0.04	0.04	0.6	10	1	449.2	0.0226
50	0.9	0.7	1	1	0.03	0.04	0.04	0.1	10	1	1591.4	0.0156
50	0.9	0.6	1	1	0.03	0.04	0.2	0.3	10	1	1327.4	0.0033
50	0.5	0.8	1	1	0.03	0.04	0.2	0.3	10	1	651.96	0.043
50	0.5	0.1	1	1	0.03	0.04	0.2	0.8	10	1	361.23	0.0121
50	0.9	0.1	1	1	0.03	0.04	0.04	0.2	10	1	1440.9	0.0158
50	0.5	0.8	1	1	0.03	0.04	0.04	0	10	1	582.37	0.0268
50	0.9	0.5	1	1	0.03	0.04	0.04	0.7	10	1	1625.2	0.0232
50	0.9	0.9	1	1	0.03	0.04	0.04	0.7	10	1	1929.4	0.0186
50	0.9	0.4	1	1	0.03	0.04	0.04	0.4	10	1	1503.5	0.0203
50	0.9	0.6	1	1	0.03	0.04	0.2	0.8	10	1	1332.5	0.0061
50	0.9	0.8	1	1	0.03	0.04	0.04	0	10	1	1638.8	0.0143
50	0.5	0.6	1	1	0.03	0.04	0.04	0.9	10	1	443.79	0.0192
50	0.5	0.01	1	1	0.03	0.04	0.2	0.6	10	1	365.35	0.0139
50	0.9	0.8	1	1	0.03	0.04	0.2	0.2	10	1	1547.2	0.0093
50	0.4	0.7	1	1	0.03	0.04	0.04	0.2	10	1	431.79	0.0209
50	0.5	0.8	1	1	0.03	0.04	0.2	0.1	10	1	680.77	0.0481
50	0.9	0.4	1	1	0.03	0.04	0.04	0.8	10	1	1542.8	0.0249
50	0.5	0.01	1	1	0.03	0.04	0.04	0.9	10	1	376.09	0.0186
50	0.5	0.4	1	1	0.03	0.04	0.2	0.5	10	1	409.4	0.0181
50	0.5	0.2	1	1	0.03	0.04	0.04	0.5	10	1	388.44	0.0188
50	0.4	0.8	1	1	0.03	0.04	0.04	0.5	10	1	523.61	0.0241
50	0.5	0.7	1	1	0.03	0.04	0.2	0.4	10	1	552.62	0.0325
50	0.9	0.6	1	1	0.03	0.04	0.2	0.4	10	1	1295.7	0.0029
50	0.9	0.7	1	1	0.03	0.04	0.04	0	10	1	1646.8	0.016
50	0.9	0.8	1	1	0.03	0.04	0.2	0.8	10	1	1594.6	0.013
50	0.6	0.1	1	1	0.03	0.04	0.2	0.3	10	1	420.21	0.0093
50	0.4	0.6	1	1	0.03	0.04	0.04	0.7	10	1	410.1	0.0201
50	0.8	0.99	1	1	0.03	0.04	0.04	0.6	10	1	2551.2	0.0125
50	0.5	0.9	1	1	0.03	0.04	0.2	0.7	10	1	1006	0.0573
50	0.9	0.4	1	1	0.03	0.04	0.04	0.9	10	1	1614.9	0.0298
50	0.9	0.7	1	1	0.03	0.04	0.04	0.2	10	1	1682.2	0.0186
50	0.5	0.6	1	1	0.03	0.04	0.04	0.2	10	1	431.23	0.0185
50	0.5	0.4	1	1	0.03	0.04	0.2	0.4	10	1	398.8	0.0148
50	0.9	0.9	1	1	0.03	0.04	0.2	0.3	10	1	1879.2	0.0193
50	0.5	0.4	1	1	0.03	0.04	0.04	0.3	10	1	401.84	0.0168
50	0.5	0.2	1	1	0.03	0.04	0.04	0.3	10	1	392.98	0.0185
50	0.6	0.01	1	1	0.03	0.04	0.2	0.3	10	1	433.25	0.0096
50	0.5	0.3	1	1	0.03	0.04	0.2	0.6	10	1	391.17	0.0158
50	0.5	0.2	1	1	0.03	0.04	0.04	0.6	10	1	384.73	0.0199
50	0.5	0.5	1	1	0.03	0.04	0.2	0	10	1	415.72	0.018
50	0.9	0.5	1	1	0.03	0.04	0.04	0.3	10	1	1560.3	0.0155
50	0.5	0.5	1	1	0.03	0.04	0.04	0	10	1	420.63	0.0175
50	0.5	0.1	1	1	0.03	0.04	0.2	0	10	1	386.89	0.0159
50	0.4	0.9	1	1	0.03	0.04	0.04	0.6	10	1	593.63	0.0158
50	0.5	0.8	1	1	0.03	0.04	0.04	0.4	10	1	528.79	0.0202
50	0.4	0.7	1	1	0.03	0.04	0.2	0.6	10	1	469.13	0.0319
50	0.5	0.9	1	1	0.03	0.04	0.04	0.9	10	1	575.76	0.0129
50	0.5	0.4	1	1	0.03	0.04	0.2	0.7	10	1	389.76	0.0169
50	0.5	0.1	1	1	0.03	0.04	0.2	0.6	10	1	366.08	0.0144
50	0.5	0.7	1	1	0.03	0.04	0.04	0.1	10	1	494.4	0.0244
50	0.6	0.9	1	1	0.03	0.04	0.2	0.4	10	1	1131.9	0.0636
50	0.5	0.5	1	1	0.03	0.04	0.2	0.5	10	1	421.72	0.0195
50	0.4	0.5	1	1	0.03	0.04	0.2	0	10	1	397.82	0.0229
50	0.9	0.1	1	1	0.03	0.04	0.04	0.5	10	1	1493.2	0.0214
50	0.5	0.6	1	1	0.03	0.04	0.04	0.5	10	1	477.06	0.0238
50	0.5	0.3	1	1	0.03	0.04	0.2	0.4	10	1	374.65	0.0173
50	0.9	0.3	1	1	0.03	0.04	0.04	0.7	10	1	1587.2	0.026
50	0.4	0.7	1	1	0.03	0.04	0.2	0.9	10	1	503.09	0.0341
50	0.5	0.4	1	1	0.03	0.04	0.04	0	10	1	422.02	0.0192
50	0.5	0.01	1	1	0.03	0.04	0.04	0.7	10	1	382.81	0.019
50	0.5	0.01	1	1	0.03	0.04	0.2	0.4	10	1	352.73	0.0107
50	0.5	0.8	1	1	0.03	0.04	0.2	0.6	10	1	683.19	0.0445
50	0.9	0.8	1	1	0.03	0.04	0.04	0.5	10	1	1790.8	0.0233
50	0.9	0.9	1	1	0.03	0.04	0.04	0	10	1	1879.3	0.0182
50	0.5	0.4	1	1	0.03	0.04	0.2	0.6	10	1	400.11	0.0177
50	0.4	0.5	1	1	0.03	0.04	0.2	0.2	10	1	394.99	0.0226
50	0.4	0.5	1	1	0.03	0.04	0.04	0.5	10	1	373.44	0.0205
50	0.5	0.3	1	1	0.03	0.04	0.2	0.7	10	1	382.81	0.0159
50	0.5	0.3	1	1	0.03	0.04	0.04	0.5	10	1	407.64	0.0205
50	0.5	0.4	1	1	0.03	0.04	0.04	0.6	10	1	399.96	0.0183
50	0.5	0.3	1	1	0.03	0.04	0.04	0.2	10	1	397.91	0.0187
50	0.5	0.2	1	1	0.03	0.04	0.2	0.5	10	1	380.08	0.0137
50	0.5	0.4	1	1	0.03	0.04	0.2	0.3	10	1	410.29	0.0184
50	0.5	0.3	1	1	0.03	0.04	0.04	0.7	10	1	389.4	0.019
50	0.5	0.1	1	1	0.03	0.04	0.04	0.5	10	1	388.31	0.019
50	0.5	0.2	1	1	0.03	0.04	0.2	0	10	1	378.6	0.0165
50	0.5	0.3	1	1	0.03	0.04	0.2	0.1	10	1	403.75	0.0152
50	0.4	0.5	1	1	0.03	0.04	0.2	0.4	10	1	383.55	0.0225
50	0.5	0.7	1	1	0.03	0.04	0.04	0.8	10	1	470.79	0.0193
50	0.9	0.3	1	1	0.03	0.04	0.04	0.5	10	1	1578.2	0.0213
50	0.5	0.3	1	1	0.03	0.04	0.2	0	10	1	395.34	0.0159
50	0.5	0.01	1	1	0.03	0.04	0.2	0.5	10	1	369.36	0.0135
50	0.5	0.01	1	1	0.03	0.04	0.04	0.4	10	1	381.14	0.0212
50	0.9	0.2	1	1	0.03	0.04	0.2	0.2	10	1	1078.1	0.0011
50	0.5	0.01	1	1	0.03	0.04	0.04	0.6	10	1	374.71	0.0182
50	0.5	0.9	1	1	0.03	0.04	0.04	0.7	10	1	666.37	0.0139
50	0.4	0.4	1	1	0.03	0.04	0.2	0.3	10	1	348.28	0.0185
50	0.9	0.9	1	1	0.03	0.04	0.04	0.2	10	1	2024	0.0217
50	0.4	0.6	1	1	0.03	0.04	0.04	0.3	10	1	410.42	0.0227
50	0.4	0.4	1	1	0.03	0.04	0.04	0.4	10	1	359.98	0.0206
50	0.5	0.2	1	1	0.03	0.04	0.2	0.3	10	1	388.26	0.0165
50	0.9	0.9	1	1	0.03	0.04	0.04	0.4	10	1	1875.8	0.0188
50	0.5	0.2	1	1	0.03	0.04	0.2	0.8	10	1	375.91	0.0147
50	0.4	0.9	1	1	0.03	0.04	0.04	0.4	10	1	625.29	0.0192
50	0.5	0.5	1	1	0.03	0.04	0.04	0.1	10	1	409	0.0186
50	0.9	0.7	1	1	0.03	0.04	0.04	0.5	10	1	1693.8	0.0206
50	0.9	0.4	1	1	0.03	0.04	0.04	0.3	10	1	1539.9	0.0186
50	0.5	0.4	1	1	0.03	0.04	0.2	0.1	10	1	408.06	0.018
50	0.5	0.99	1	1	0.03	0.04	0.04	0.7	10	1	1195.5	0.0052
50	0.5	0.2	1	1	0.03	0.04	0.2	0.7	10	1	369.35	0.014
50	0.5	0.3	1	1	0.03	0.04	0.2	0.5	10	1	393.05	0.0138
50	0.5	0.3	1	1	0.03	0.04	0.04	0.1	10	1	406.09	0.0201
50	0.9	0.7	1	1	0.03	0.04	0.04	0.4	10	1	1692.3	0.0215
50	0.5	0.3	1	1	0.03	0.04	0.04	0.6	10	1	395.45	0.0184
50	0.5	0.2	1	1	0.03	0.04	0.2	0.1	10	1	377.51	0.0156
50	0.5	0.01	1	1	0.03	0.04	0.2	0.3	10	1	357.58	0.0141
50	0.5	0.01	1	1	0.03	0.04	0.2	0.8	10	1	374.13	0.0143
50	0.5	0.8	1	1	0.03	0.04	0.04	0.8	10	1	541.91	0.0198
50	0.5	0.2	1	1	0.03	0.04	0.04	0.9	10	1	389.4	0.0198
50	0.5	0.6	1	1	0.03	0.04	0.04	0.1	10	1	452.02	0.0212
50	0.5	0.01	1	1	0.03	0.04	0.04	0.8	10	1	382.77	0.0204
50	0.5	0.01	1	1	0.03	0.04	0.04	0.5	10	1	394.43	0.0177
50	0.4	0.8	1	1	0.03	0.04	0.04	0.4	10	1	521.86	0.0234
50	0.5	0.3	1	1	0.03	0.04	0.2	0.3	10	1	392.9	0.0148
50	0.4	0.6	1	1	0.03	0.04	0.2	0.1	10	1	421.01	0.0273
50	0.5	0.4	1	1	0.03	0.04	0.2	0.9	10	1	419.41	0.0172
50	0.4	0.2	1	1	0.03	0.04	0.2	0.7	10	1	330.77	0.0176
50	0.5	0.1	1	1	0.03	0.04	0.04	0	10	1	393.13	0.017
50	0.9	0.2	1	1	0.03	0.04	0.04	0.7	10	1	1539.2	0.0251
50	0.5	0.2	1	1	0.03	0.04	0.04	0.8	10	1	395.21	0.0207
50	0.9	0.5	1	1	0.03	0.04	0.04	0.6	10	1	1599.1	0.0238
50	0.5	0.2	1	1	0.03	0.04	0.2	0.9	10	1	393.83	0.0164
50	0.9	0.2	1	1	0.03	0.04	0.04	0.6	10	1	1516.2	0.0232
50	0.5	0.5	1	1	0.03	0.04	0.2	0.6	10	1	435.01	0.0202
50	0.5	0.9	1	1	0.03	0.04	0.2	0.2	10	1	1081.2	0.0712
50	0.5	0.6	1	1	0.03	0.04	0.2	0	10	1	481.04	0.0256
50	0.5	0.4	1	1	0.03	0.04	0.2	0	10	1	408.28	0.0179
50	0.4	0.2	1	1	0.03	0.04	0.2	0.3	10	1	319.31	0.0145
50	0.5	0.1	1	1	0.03	0.04	0.04	0.8	10	1	398.89	0.0223
50	0.5	0.6	1	1	0.03	0.04	0.04	0.8	10	1	454.17	0.0204
50	0.5	0.2	1	1	0.03	0.04	0.04	0.7	10	1	401.67	0.0195
50	0.9	0.1	1	1	0.03	0.04	0.04	0.7	10	1	1573.9	0.0272
50	0.9	0.6	1	1	0.03	0.04	0.04	0.5	10	1	1678.2	0.0221
50	0.5	0.01	1	1	0.03	0.04	0.04	0.2	10	1	383.15	0.0173
50	0.5	0.8	1	1	0.03	0.04	0.04	0.9	10	1	529.39	0.0192
50	0.7	0.99	1	1	0.03	0.04	0.04	0.4	10	1	2489.5	0.0183
50	0.9	0.9	1	1	0.03	0.04	0.2	0.1	10	1	1899.4	0.018
50	0.5	0.7	1	1	0.03	0.04	0.04	0	10	1	497.79	0.0235
50	0.5	0.5	1	1	0.03	0.04	0.2	0.8	10	1	430.92	0.0214
50	0.5	0.6	1	1	0.03	0.04	0.04	0.3	10	1	431.15	0.0189
50	0.9	0.2	1	1	0.03	0.04	0.04	0.3	10	1	1451.3	0.0172
50	0.5	0.01	1	1	0.03	0.04	0.04	0.1	10	1	387.27	0.02
50	0.5	0.8	1	1	0.03	0.04	0.04	0.7	10	1	551.62	0.0233
50	0.9	0.8	1	1	0.03	0.04	0.04	0.8	10	1	1769	0.023
50	0.5	0.2	1	1	0.03	0.04	0.04	0.2	10	1	381.08	0.0163
50	0.9	0.99	1	1	0.03	0.04	0.04	0.6	10	1	3368	0.0124
50	0.5	0.01	1	1	0.03	0.04	0.04	0.3	10	1	382.54	0.0178
50	0.5	0.01	1	1	0.03	0.04	0.2	0	10	1	366.75	0.0132
50	0.5	0.6	1	1	0.03	0.04	0.2	0.5	10	1	469.38	0.0245
50	0.9	0.4	1	1	0.03	0.04	0.04	0.7	10	1	1602.6	0.0271
50	0.5	0.6	1	1	0.03	0.04	0.2	0.6	10	1	478.61	0.0247
50	0.9	0.1	1	1	0.03	0.04	0.04	0.9	10	1	1559.9	0.0351
50	0.5	0.3	1	1	0.03	0.04	0.04	0.9	10	1	408.46	0.0197
50	0.5	0.7	1	1	0.03	0.04	0.2	0	10	1	538.63	0.0308
50	0.5	0.7	1	1	0.03	0.04	0.2	0.1	10	1	531.02	0.0328
50	0.5	0.7	1	1	0.03	0.04	0.04	0.7	10	1	482.25	0.0216
50	0.5	0.2	1	1	0.03	0.04	0.04	0	10	1	393.46	0.021
50	0.5	0.3	1	1	0.03	0.04	0.04	0.8	10	1	396.43	0.0207
50	0.5	0.1	1	1	0.03	0.04	0.04	0.4	10	1	380.01	0.0194
50	0.9	0.01	1	1	0.03	0.04	0.04	0.7	10	1	1556.8	0.0306
50	0.5	0.6	1	1	0.03	0.04	0.04	0	10	1	466.22	0.0214
50	0.4	0.01	1	1	0.03	0.04	0.2	0	10	1	324.25	0.0145
50	0.4	0.2	1	1	0.03	0.04	0.2	0.9	10	1	333.95	0.018
50	0.5	0.8	1	1	0.03	0.04	0.04	0.3	10	1	546.61	0.0233
50	0.4	0.7	1	1	0.03	0.04	0.04	0.7	10	1	435.71	0.0229
50	0.5	0.1	1	1	0.03	0.04	0.04	0.9	10	1	395.45	0.0193
50	0.4	0.7	1	1	0.03	0.04	0.04	0.6	10	1	416.83	0.0211
50	0.5	0.2	1	1	0.03	0.04	0.04	0.4	10	1	382.86	0.0173
50	0.5	0.9	1	1	0.03	0.04	0.04	0.6	10	1	654.41	0.0168
50	0.5	0.7	1	1	0.03	0.04	0.04	0.4	10	1	495.1	0.021
50	0.5	0.1	1	1	0.03	0.04	0.04	0.6	10	1	397.16	0.0191
50	0.4	0.8	1	1	0.03	0.04	0.04	0.6	10	1	535.93	0.0225
50	0.5	0.6	1	1	0.03	0.04	0.2	0.2	10	1	462.5	0.0234
50	0.4	0.2	1	1	0.03	0.04	0.04	0.5	10	1	334.52	0.0184
50	0.9	0.4	1	1	0.03	0.04	0.04	0.2	10	1	1494.7	0.0163
50	0.5	0.1	1	1	0.03	0.04	0.2	0.4	10	1	374.5	0.0124
50	0.4	0.01	1	1	0.03	0.04	0.2	0.3	10	1	313	0.0139
50	0.4	0.1	1	1	0.03	0.04	0.04	0.3	10	1	343.76	0.0198
50	0.5	0.4	1	1	0.03	0.04	0.04	0.1	10	1	418.45	0.0188
50	0.5	0.6	1	1	0.03	0.04	0.04	0.6	10	1	454.17	0.0184
50	0.5	0.3	1	1	0.03	0.04	0.2	0.9	10	1	383.87	0.0149
50	0.5	0.8	1	1	0.03	0.04	0.2	0.7	10	1	698.35	0.0451
50	0.4	0.1	1	1	0.03	0.04	0.2	0.4	10	1	329.62	0.0165
50	0.5	0.6	1	1	0.03	0.04	0.2	0.1	10	1	471.05	0.0229
50	0.4	0.7	1	1	0.03	0.04	0.04	0.5	10	1	438.72	0.0217
50	0.5	0.01	1	1	0.03	0.04	0.2	0.9	10	1	369.08	0.0127
50	0.4	0.01	1	1	0.03	0.04	0.2	0.4	10	1	314.27	0.0165
50	0.5	0.8	1	1	0.03	0.04	0.04	0.5	10	1	551.02	0.0206
50	0.4	0.7	1	1	0.03	0.04	0.04	0.4	10	1	427.73	0.0212
50	0.9	0.5	1	1	0.03	0.04	0.04	0.9	10	1	1617.9	0.0284
50	0.4	0.6	1	1	0.03	0.04	0.04	0.8	10	1	408.41	0.0223
50	0.5	0.6	1	1	0.03	0.04	0.2	0.9	10	1	468.8	0.0244
50	0.9	0.8	1	1	0.03	0.04	0.04	0.9	10	1	1780.3	0.027
50	0.9	0.8	1	1	0.03	0.04	0.04	0.2	10	1	1715.6	0.0168
50	0.5	0.1	1	1	0.03	0.04	0.2	0.2	10	1	375.93	0.0136
50	0.4	0.5	1	1	0.03	0.04	0.2	0.5	10	1	380.3	0.0223
50	0.5	0.8	1	1	0.03	0.04	0.04	0.6	10	1	569.19	0.0207
50	0.5	0.7	1	1	0.03	0.04	0.04	0.6	10	1	487.74	0.0226
50	0.5	0.1	1	1	0.03	0.04	0.2	0.3	10	1	368.02	0.0151
50	0.4	0.99	1	1	0.03	0.04	0.04	0.8	10	1	992.46	0.0036
50	0.5	0.7	1	1	0.03	0.04	0.2	0.8	10	1	503.01	0.0274
50	0.5	0.2	1	1	0.03	0.04	0.2	0.4	10	1	376.78	0.0147
50	0.6	0.99	1	1	0.03	0.04	0.04	0.4	10	1	2015.2	0.017
50	0.5	0.7	1	1	0.03	0.04	0.2	0.7	10	1	525.94	0.0321
50	0.5	0.7	1	1	0.03	0.04	0.2	0.6	10	1	538.36	0.0325
50	0.5	0.3	1	1	0.03	0.04	0.2	0.8	10	1	386.4	0.0157
50	0.4	0.6	1	1	0.03	0.04	0.2	0.7	10	1	423.37	0.0263
50	0.5	0.1	1	1	0.03	0.04	0.2	0.9	10	1	375.86	0.0141
50	0.5	0.3	1	1	0.03	0.04	0.04	0.4	10	1	413.18	0.0201
50	0.4	0.01	1	1	0.03	0.04	0.2	0.9	10	1	320.97	0.0142
50	0.4	0.4	1	1	0.03	0.04	0.2	0.2	10	1	355.75	0.0183
50	0.4	0.6	1	1	0.03	0.04	0.2	0.4	10	1	415.81	0.0268
50	0.4	0.6	1	1	0.03	0.04	0.04	0.6	10	1	402.57	0.0223
50	0.4	0.01	1	1	0.03	0.04	0.04	0.8	10	1	332.61	0.0188
50	0.4	0.9	1	1	0.03	0.04	0.04	0.1	10	1	766.58	0.0276
50	0.4	0.6	1	1	0.03	0.04	0.2	0.9	10	1	436.18	0.0254
50	0.4	0.99	1	1	0.03	0.04	0.04	0.7	10	1	1110.4	0.0063
50	0.4	0.6	1	1	0.03	0.04	0.04	0.5	10	1	399.97	0.0205
50	0.4	0.6	1	1	0.03	0.04	0.2	0	10	1	407.41	0.0251
50	0.9	0.6	1	1	0.03	0.04	0.04	0.3	10	1	1599.8	0.0175
50	0.9	0.3	1	1	0.03	0.04	0.04	0.8	10	1	1596	0.0298
50	0.5	0.99	1	1	0.03	0.04	0.04	0.6	10	1	1377.8	0.0087
50	0.5	0.7	1	1	0.03	0.04	0.2	0.2	10	1	534.47	0.0325
50	0.4	0.8	1	1	0.03	0.04	0.04	0.7	10	1	476.79	0.0188
50	0.5	0.1	1	1	0.03	0.04	0.04	0.2	10	1	385.52	0.0186
50	0.4	0.7	1	1	0.03	0.04	0.04	0.9	10	1	430.81	0.0208
50	0.9	0.8	1	1	0.03	0.04	0.04	0.6	10	1	1847.6	0.0225
50	0.4	0.01	1	1	0.03	0.04	0.04	0.4	10	1	333.23	0.0185
50	0.4	0.01	1	1	0.03	0.04	0.04	0.2	10	1	337.33	0.0191
50	0.4	0.6	1	1	0.03	0.04	0.04	0	10	1	417.56	0.0214
50	0.5	0.01	1	1	0.03	0.04	0.04	0	10	1	366.52	0.0174
50	0.5	0.7	1	1	0.03	0.04	0.2	0.3	10	1	539.93	0.0285
50	0.4	0.6	1	1	0.03	0.04	0.04	0.1	10	1	416.7	0.0237
50	0.9	0.3	1	1	0.03	0.04	0.04	0.9	10	1	1588.2	0.0316
50	0.4	0.1	1	1	0.03	0.04	0.2	0.2	10	1	341.44	0.0162
50	0.5	0.7	1	1	0.03	0.04	0.04	0.5	10	1	532.64	0.0245
50	0.9	0.7	1	1	0.03	0.04	0.04	0.9	10	1	1821.5	0.0287
50	0.4	0.3	1	1	0.03	0.04	0.04	0.6	10	1	352.51	0.0187
50	0.5	0.99	1	1	0.03	0.04	0.04	0.3	10	1	1878.1	0.019
50	0.4	0.3	1	1	0.03	0.04	0.2	0.3	10	1	333.02	0.0175
50	0.4	0.7	1	1	0.03	0.04	0.2	0.5	10	1	504.19	0.0357
50	0.4	0.7	1	1	0.03	0.04	0.2	0.1	10	1	492.36	0.033
50	0.4	0.6	1	1	0.03	0.04	0.2	0.6	10	1	428.47	0.0265
50	0.9	0.5	1	1	0.03	0.04	0.04	0.8	10	1	1653.2	0.0268
50	0.4	0.3	1	1	0.03	0.04	0.04	0.8	10	1	351.98	0.0183
50	0.6	0.99	1	1	0.03	0.04	0.04	0.7	10	1	1503	0.0089
50	0.4	0.5	1	1	0.03	0.04	0.04	0.9	10	1	385.55	0.0214
50	0.4	0.7	1	1	0.03	0.04	0.2	0.4	10	1	514.18	0.0381
50	0.6	0.9	1	1	0.03	0.04	0.2	0.1	10	1	1156.2	0.0661
50	0.5	0.7	1	1	0.03	0.04	0.2	0.9	10	1	546.1	0.0309
50	0.4	0.5	1	1	0.03	0.04	0.04	0.2	10	1	360.13	0.0199
50	0.5	0.9	1	1	0.03	0.04	0.2	0.1	10	1	1102	0.0728
50	0.4	0.3	1	1	0.03	0.04	0.2	0.7	10	1	348.28	0.0186
50	0.4	0.7	1	1	0.03	0.04	0.04	0.3	10	1	453.25	0.0234
50	0.5	0.7	1	1	0.03	0.04	0.2	0.5	10	1	548.61	0.0336
50	0.4	0.2	1	1	0.03	0.04	0.2	0	10	1	311.3	0.0126
50	0.4	0.2	1	1	0.03	0.04	0.04	0.6	10	1	328.95	0.0189
50	0.4	0.3	1	1	0.03	0.04	0.04	0.7	10	1	359.27	0.0194
50	0.5	0.4	1	1	0.03	0.04	0.04	0.9	10	1	415.11	0.0201
50	0.4	0.7	1	1	0.03	0.04	0.2	0.3	10	1	484.93	0.034
50	0.4	0.8	1	1	0.03	0.04	0.04	0.3	10	1	494.56	0.0232
50	0.4	0.4	1	1	0.03	0.04	0.2	0.1	10	1	353.98	0.0192
50	0.4	0.2	1	1	0.03	0.04	0.2	0.6	10	1	323.63	0.0126
50	0.7	0.99	1	1	0.03	0.04	0.2	0.8	10	1	3289.7	0.0432
50	0.4	0.4	1	1	0.03	0.04	0.04	0.5	10	1	363.32	0.0204
50	0.5	0.99	1	1	0.03	0.04	0.04	0.5	10	1	1693.1	0.0123
50	0.4	0.8	1	1	0.03	0.04	0.2	0.6	10	1	591.54	0.0429
50	0.4	0.3	1	1	0.03	0.04	0.04	0.1	10	1	345.46	0.0198
50	0.4	0.3	1	1	0.03	0.04	0.2	0	10	1	334.51	0.0173
50	0.4	0.5	1	1	0.03	0.04	0.04	0.8	10	1	365.22	0.0205
50	0.4	0.2	1	1	0.03	0.04	0.2	0.8	10	1	336.23	0.0195
50	0.4	0.6	1	1	0.03	0.04	0.2	0.5	10	1	419.04	0.0272
50	0.4	0.4	1	1	0.03	0.04	0.04	0.2	10	1	360.23	0.0208
50	0.4	0.2	1	1	0.03	0.04	0.04	0.9	10	1	337.02	0.0197
50	0.7	0.99	1	1	0.03	0.04	0.2	0.9	10	1	3383	0.0421
50	0.4	0.01	1	1	0.03	0.04	0.2	0.5	10	1	313.04	0.0132
50	0.9	0.6	1	1	0.03	0.04	0.04	0.4	10	1	1634.2	0.02
50	0.5	0.9	1	1	0.03	0.04	0.04	0.3	10	1	753.38	0.0205
50	0.7	0.99	1	1	0.03	0.04	0.04	0.3	10	1	2752.3	0.0209
50	0.4	0.7	1	1	0.03	0.04	0.04	0.1	10	1	442	0.0257
50	0.4	0.1	1	1	0.03	0.04	0.04	0.5	10	1	333.3	0.0193
50	0.4	0.1	1	1	0.03	0.04	0.2	0.5	10	1	327.47	0.0161
50	0.4	0.5	1	1	0.03	0.04	0.04	0.6	10	1	385.33	0.02
50	0.4	0.01	1	1	0.03	0.04	0.2	0.1	10	1	324.66	0.0152
50	0.9	0.99	1	1	0.03	0.04	0.04	0.9	10	1	2848.1	0.0071
50	0.4	0.1	1	1	0.03	0.04	0.04	0.1	10	1	318.06	0.0186
50	0.5	0.99	1	1	0.03	0.04	0.04	0.4	10	1	1788.6	0.0145
50	0.4	0.2	1	1	0.03	0.04	0.04	0.7	10	1	345.43	0.0216
50	0.4	0.3	1	1	0.03	0.04	0.04	0.5	10	1	332.99	0.0177
50	0.4	0.6	1	1	0.03	0.04	0.2	0.3	10	1	413.4	0.0261
50	0.4	0.1	1	1	0.03	0.04	0.04	0	10	1	339.3	0.0193
50	0.4	0.1	1	1	0.03	0.04	0.04	0.2	10	1	327.1	0.017
50	0.3	0.8	1	1	0.03	0.04	0.04	0	10	1	491.15	0.0258
50	0.4	0.5	1	1	0.03	0.04	0.04	0.1	10	1	383.63	0.0214
50	0.4	0.9	1	1	0.03	0.04	0.2	0.6	10	1	996.61	0.0649
50	0.3	0.5	1	1	0.03	0.04	0.2	0.4	10	1	343.04	0.0237
50	0.4	0.2	1	1	0.03	0.04	0.04	0.2	10	1	332.64	0.0183
50	0.4	0.5	1	1	0.03	0.04	0.04	0.7	10	1	367.18	0.0206
50	0.4	0.4	1	1	0.03	0.04	0.2	0	10	1	360.67	0.022
50	0.4	0.6	1	1	0.03	0.04	0.04	0.4	10	1	418.39	0.0233
50	0.4	0.8	1	1	0.03	0.04	0.2	0.3	10	1	660.62	0.0521
50	0.4	0.4	1	1	0.03	0.04	0.2	0.4	10	1	346.9	0.0193
50	0.3	0.4	1	1	0.03	0.04	0.04	0.4	10	1	326.71	0.0232
50	0.4	0.1	1	1	0.03	0.04	0.2	0	10	1	319.7	0.0146
50	0.4	0.1	1	1	0.03	0.04	0.04	0.6	10	1	336.53	0.0185
50	0.4	0.8	1	1	0.03	0.04	0.2	0.4	10	1	642.78	0.0506
50	0.4	0.4	1	1	0.03	0.04	0.04	0.7	10	1	372.8	0.0196
50	0.4	0.6	1	1	0.03	0.04	0.04	0.9	10	1	393.24	0.0193
50	0.4	0.4	1	1	0.03	0.04	0.04	0.9	10	1	357.17	0.019
50	0.4	0.6	1	1	0.03	0.04	0.04	0.2	10	1	415.79	0.0197
50	0.4	0.5	1	1	0.03	0.04	0.2	0.1	10	1	377.27	0.0232
50	0.4	0.2	1	1	0.03	0.04	0.04	0	10	1	342.28	0.0202
50	0.6	0.99	1	1	0.03	0.04	0.04	0.6	10	1	1603.9	0.0087
50	0.4	0.01	1	1	0.03	0.04	0.04	0.1	10	1	333.24	0.0178
50	0.4	0.7	1	1	0.03	0.04	0.2	0.2	10	1	497.62	0.036
50	0.4	0.5	1	1	0.03	0.04	0.2	0.8	10	1	398.05	0.0219
50	0.4	0.5	1	1	0.03	0.04	0.04	0.3	10	1	382.9	0.0213
50	0.4	0.1	1	1	0.03	0.04	0.04	0.7	10	1	342	0.0208
50	0.4	0.8	1	1	0.03	0.04	0.04	0.2	10	1	524.33	0.0248
50	0.4	0.1	1	1	0.03	0.04	0.2	0.6	10	1	332.64	0.0155
50	0.4	0.9	1	1	0.03	0.04	0.04	0.2	10	1	713.25	0.0245
50	0.4	0.1	1	1	0.03	0.04	0.2	0.1	10	1	337.75	0.0165
50	0.4	0.4	1	1	0.03	0.04	0.2	0.7	10	1	364.08	0.0212
50	0.3	0.6	1	1	0.03	0.04	0.2	0.1	10	1	400.15	0.0314
50	0.4	0.2	1	1	0.03	0.04	0.2	0.5	10	1	331.21	0.0165
50	0.4	0.4	1	1	0.03	0.04	0.04	0	10	1	378.61	0.023
50	0.4	0.8	1	1	0.03	0.04	0.04	0.8	10	1	469.5	0.0194
50	0.4	0.3	1	1	0.03	0.04	0.2	0.4	10	1	334.64	0.0161
50	0.5	0.9	1	1	0.03	0.04	0.2	0.6	10	1	1028	0.0605
50	0.4	0.5	1	1	0.03	0.04	0.04	0	10	1	382.18	0.0195
50	0.4	0.8	1	1	0.03	0.04	0.04	0.1	10	1	519.22	0.0235
50	0.4	0.5	1	1	0.03	0.04	0.2	0.3	10	1	388.17	0.0241
50	0.4	0.7	1	1	0.03	0.04	0.04	0	10	1	429.52	0.0227
50	0.3	0.5	1	1	0.03	0.04	0.2	0.8	10	1	346.1	0.0232
50	0.5	0.8	1	1	0.03	0.04	0.2	0.8	10	1	685.74	0.0453
50	0.4	0.4	1	1	0.03	0.04	0.2	0.8	10	1	365.52	0.0219
50	0.4	0.5	1	1	0.03	0.04	0.2	0.7	10	1	384.61	0.0226
50	0.4	0.8	1	1	0.03	0.04	0.2	0.1	10	1	644.21	0.0525
50	0.4	0.4	1	1	0.03	0.04	0.2	0.6	10	1	365.74	0.0194
50	0.4	0.4	1	1	0.03	0.04	0.04	0.3	10	1	347.28	0.0209
50	0.4	0.1	1	1	0.03	0.04	0.2	0.3	10	1	334.94	0.0161
50	0.3	0.2	1	1	0.03	0.04	0.2	0.7	10	1	297.38	0.0178
50	0.5	0.99	1	1	0.03	0.04	0.04	0.9	10	1	1053.2	0.0046
50	0.4	0.2	1	1	0.03	0.04	0.2	0.2	10	1	338.34	0.0189
50	0.4	0.3	1	1	0.03	0.04	0.2	0.9	10	1	348.8	0.0183
50	0.4	0.01	1	1	0.03	0.04	0.2	0.8	10	1	318.39	0.0147
50	0.4	0.4	1	1	0.03	0.04	0.2	0.5	10	1	359.66	0.0208
50	0.4	0.8	1	1	0.03	0.04	0.04	0	10	1	487.22	0.0233
50	0.5	0.9	1	1	0.03	0.04	0.04	0	10	1	798.58	0.03
50	0.5	0.8	1	1	0.03	0.04	0.2	0.9	10	1	673.14	0.0404
50	0.4	0.2	1	1	0.03	0.04	0.04	0.3	10	1	330.14	0.0172
50	0.4	0.3	1	1	0.03	0.04	0.04	0	10	1	355.24	0.0204
50	0.4	0.2	1	1	0.03	0.04	0.04	0.8	10	1	336.93	0.0187
50	0.4	0.2	1	1	0.03	0.04	0.2	0.4	10	1	338.48	0.0177
50	0.4	0.3	1	1	0.03	0.04	0.2	0.2	10	1	344.97	0.0178
50	0.3	0.6	1	1	0.03	0.04	0.04	0.7	10	1	355	0.0191
50	0.9	0.6	1	1	0.03	0.04	0.04	0.8	10	1	1690.2	0.0262
50	0.3	0.7	1	1	0.03	0.04	0.04	0.5	10	1	399.2	0.022
50	0.4	0.3	1	1	0.03	0.04	0.04	0.4	10	1	357.42	0.0215
50	0.4	0.01	1	1	0.03	0.04	0.04	0.9	10	1	330.12	0.0195
50	0.4	0.4	1	1	0.03	0.04	0.2	0.9	10	1	364.67	0.0213
50	0.3	0.9	1	1	0.03	0.04	0.04	0.8	10	1	536.73	0.0125
50	0.5	0.8	1	1	0.03	0.04	0.2	0.4	10	1	716.11	0.0494
50	0.4	0.5	1	1	0.03	0.04	0.2	0.6	10	1	399.46	0.0246
50	0.3	0.2	1	1	0.03	0.04	0.2	0.4	10	1	289.03	0.0164
50	0.4	0.7	1	1	0.03	0.04	0.04	0.8	10	1	445.89	0.0219
50	0.9	0.6	1	1	0.03	0.04	0.04	0.1	10	1	1568.5	0.0146
50	0.3	0.1	1	1	0.03	0.04	0.2	0.2	10	1	296.57	0.0177
50	0.3	0.1	1	1	0.03	0.04	0.04	0.2	10	1	296.68	0.0186
50	0.4	0.1	1	1	0.03	0.04	0.04	0.9	10	1	331.87	0.0187
50	0.3	0.1	1	1	0.03	0.04	0.04	0.1	10	1	296.4	0.0192
50	0.4	0.4	1	1	0.03	0.04	0.04	0.6	10	1	360.08	0.0163
50	0.4	0.3	1	1	0.03	0.04	0.2	0.5	10	1	329.83	0.0184
50	0.5	0.8	1	1	0.03	0.04	0.2	0.5	10	1	691.35	0.0443
50	0.3	0.8	1	1	0.03	0.04	0.04	0.7	10	1	438.2	0.0199
50	0.4	0.2	1	1	0.03	0.04	0.04	0.1	10	1	342.01	0.018
50	0.9	0.99	1	1	0.03	0.04	0.04	0.8	10	1	3079.3	0.0088
50	0.4	0.01	1	1	0.03	0.04	0.2	0.2	10	1	319.32	0.0156
50	0.3	0.8	1	1	0.03	0.04	0.2	0	10	1	588.09	0.0521
50	0.5	0.9	1	1	0.03	0.04	0.04	0.1	10	1	791.88	0.028
50	0.3	0.5	1	1	0.03	0.04	0.2	0.1	10	1	353.06	0.0257
50	0.4	0.3	1	1	0.03	0.04	0.04	0.3	10	1	351	0.0206
50	0.3	0.5	1	1	0.03	0.04	0.2	0.6	10	1	355.14	0.0233
50	0.4	0.1	1	1	0.03	0.04	0.2	0.8	10	1	326.83	0.0166
50	0.4	0.2	1	1	0.03	0.04	0.04	0.4	10	1	346.7	0.0184
50	0.3	0.4	1	1	0.03	0.04	0.04	0.7	10	1	331.14	0.0191
50	0.4	0.6	1	1	0.03	0.04	0.2	0.2	10	1	427.66	0.0274
50	0.8	0.99	1	1	0.03	0.04	0.04	0.5	10	1	2730.2	0.0122
50	0.3	0.3	1	1	0.03	0.04	0.2	0.8	10	1	310.81	0.0179
50	0.3	0.1	1	1	0.03	0.04	0.2	0	10	1	291.94	0.0169
50	0.4	0.9	1	1	0.03	0.04	0.04	0.5	10	1	598.84	0.0176
50	0.4	0.7	1	1	0.03	0.04	0.2	0.8	10	1	487.44	0.0332
50	0.4	0.6	1	1	0.03	0.04	0.2	0.8	10	1	433.17	0.029
50	0.3	0.4	1	1	0.03	0.04	0.04	0.6	10	1	317.3	0.0209
50	0.4	0.01	1	1	0.03	0.04	0.04	0.5	10	1	338.21	0.0188
50	0.4	0.1	1	1	0.03	0.04	0.2	0.7	10	1	334.02	0.0138
50	0.4	0.4	1	1	0.03	0.04	0.04	0.8	10	1	374.26	0.0213
50	0.3	0.5	1	1	0.03	0.04	0.04	0.8	10	1	343.1	0.02
50	0.4	0.3	1	1	0.03	0.04	0.04	0.9	10	1	344.22	0.0203
50	0.4	0.2	1	1	0.03	0.04	0.2	0.1	10	1	338.82	0.0162
50	0.4	0.8	1	1	0.03	0.04	0.04	0.9	10	1	488.44	0.0191
50	0.4	0.01	1	1	0.03	0.04	0.04	0	10	1	325.86	0.0173
50	0.3	0.5	1	1	0.03	0.04	0.04	0.7	10	1	344.79	0.0194
50	0.3	0.4	1	1	0.03	0.04	0.2	0.6	10	1	339.85	0.0229
50	0.5	0.6	1	1	0.03	0.04	0.2	0.3	10	1	477.23	0.0247
50	0.4	0.3	1	1	0.03	0.04	0.2	0.8	10	1	347.91	0.02
50	0.4	0.1	1	1	0.03	0.04	0.2	0.9	10	1	326.92	0.016
50	0.3	0.4	1	1	0.03	0.04	0.2	0.5	10	1	339.96	0.0209
50	0.3	0.6	1	1	0.03	0.04	0.2	0.5	10	1	391.79	0.0296
50	0.4	0.01	1	1	0.03	0.04	0.2	0.7	10	1	309.29	0.0129
50	0.4	0.9	1	1	0.03	0.04	0.04	0.9	10	1	579.07	0.0124
50	0.4	0.01	1	1	0.03	0.04	0.04	0.3	10	1	330.81	0.0203
50	0.4	0.01	1	1	0.03	0.04	0.2	0.6	10	1	305.47	0.0122
50	0.3	0.1	1	1	0.03	0.04	0.04	0	10	1	310.15	0.0196
50	0.3	0.2	1	1	0.03	0.04	0.2	0.5	10	1	303.01	0.0179
50	0.7	0.99	1	1	0.03	0.04	0.04	0.2	10	1	2902.3	0.0241
50	0.3	0.01	1	1	0.03	0.04	0.2	0.9	10	1	278.52	0.017
50	0.4	0.3	1	1	0.03	0.04	0.2	0.6	10	1	344.28	0.0193
50	0.3	0.01	1	1	0.03	0.04	0.04	0.7	10	1	285.93	0.0169
50	0.4	0.1	1	1	0.03	0.04	0.04	0.8	10	1	327.15	0.0173
50	0.4	0.3	1	1	0.03	0.04	0.2	0.1	10	1	355.29	0.0186
50	0.3	0.2	1	1	0.03	0.04	0.2	0.9	10	1	304.54	0.0198
50	0.3	0.8	1	1	0.03	0.04	0.2	0.3	10	1	584.42	0.0511
50	0.5	0.9	1	1	0.03	0.04	0.2	0.5	10	1	1071	0.066
50	0.3	0.9	1	1	0.03	0.04	0.04	0.9	10	1	518.72	0.0105
50	0.4	0.01	1	1	0.03	0.04	0.04	0.6	10	1	335.65	0.0203
50	0.5	0.7	1	1	0.03	0.04	0.04	0.9	10	1	477.53	0.0211
50	0.4	0.5	1	1	0.03	0.04	0.2	0.9	10	1	369.07	0.021
50	0.4	0.3	1	1	0.03	0.04	0.04	0.2	10	1	337.14	0.0197
50	0.4	0.9	1	1	0.03	0.04	0.04	0.8	10	1	574.23	0.0145
50	0.3	0.7	1	1	0.03	0.04	0.04	0.9	10	1	392.11	0.0195
50	0.3	0.8	1	1	0.03	0.04	0.04	0.2	10	1	492.13	0.0248
50	0.3	0.6	1	1	0.03	0.04	0.04	0	10	1	380.53	0.0235
50	0.4	0.01	1	1	0.03	0.04	0.04	0.7	10	1	338.85	0.0198
50	0.7	0.99	1	1	0.03	0.04	0.04	0.1	10	1	2930.3	0.0262
50	0.3	0.5	1	1	0.03	0.04	0.2	0.7	10	1	365.86	0.0273
50	0.3	0.6	1	1	0.03	0.04	0.04	0.8	10	1	369.03	0.0214
50	0.3	0.9	1	1	0.03	0.04	0.04	0.7	10	1	556.52	0.0154
50	0.3	0.1	1	1	0.03	0.04	0.2	0.5	10	1	287.08	0.0171
50	0.9	0.6	1	1	0.03	0.04	0.04	0	10	1	1644.6	0.0151
50	0.3	0.4	1	1	0.03	0.04	0.04	0.1	10	1	328.49	0.0203
50	0.8	0.99	1	1	0.03	0.04	0.04	0.3	10	1	2684	0.0177
50	0.4	0.7	1	1	0.03	0.04	0.2	0	10	1	492.75	0.0364
50	0.4	0.7	1	1	0.03	0.04	0.2	0.7	10	1	499.19	0.0346
50	0.3	0.6	1	1	0.03	0.04	0.04	0.5	10	1	361.4	0.022
50	0.3	0.2	1	1	0.03	0.04	0.04	0.4	10	1	306.6	0.0212
50	0.3	0.8	1	1	0.03	0.04	0.2	0.7	10	1	545.56	0.0431
50	0.3	0.5	1	1	0.03	0.04	0.2	0	10	1	350.88	0.0253
50	0.3	0.4	1	1	0.03	0.04	0.04	0.2	10	1	318.91	0.0182
50	0.3	0.01	1	1	0.03	0.04	0.2	0.6	10	1	290.27	0.0174
50	0.7	0.99	1	1	0.03	0.04	0.2	0.7	10	1	3516.9	0.0476
50	0.3	0.2	1	1	0.03	0.04	0.2	0.2	10	1	279.55	0.0178
50	0.4	0.99	1	1	0.03	0.04	0.04	0.9	10	1	907.44	0.0038
50	0.3	0.2	1	1	0.03	0.04	0.2	0	10	1	300.48	0.0186
50	0.3	0.1	1	1	0.03	0.04	0.2	0.1	10	1	287	0.0182
50	0.3	0.7	1	1	0.03	0.04	0.04	0.3	10	1	382.27	0.0198
50	0.4	0.8	1	1	0.03	0.04	0.2	0.2	10	1	656.11	0.0521
50	0.3	0.8	1	1	0.03	0.04	0.04	0.3	10	1	448.75	0.0238
50	0.3	0.1	1	1	0.03	0.04	0.2	0.8	10	1	291.85	0.0159
50	0.9	0.9	1	1	0.03	0.04	0.2	0	10	1	1783.5	0.02
50	0.3	0.99	1	1	0.03	0.04	0.04	0.9	10	1	758.57	0.0021
50	0.4	0.4	1	1	0.03	0.04	0.04	0.1	10	1	351.13	0.0202
50	0.3	0.5	1	1	0.03	0.04	0.04	0.3	10	1	330.54	0.0202
50	0.3	0.2	1	1	0.03	0.04	0.2	0.1	10	1	304.32	0.0176
50	0.3	0.4	1	1	0.03	0.04	0.2	0	10	1	312.51	0.019
50	0.3	0.4	1	1	0.03	0.04	0.2	0.1	10	1	328.91	0.0234
50	0.3	0.7	1	1	0.03	0.04	0.2	0.9	10	1	453.1	0.0371
50	0.3	0.2	1	1	0.03	0.04	0.04	0.2	10	1	302.42	0.0199
50	0.3	0.5	1	1	0.03	0.04	0.04	0.4	10	1	340.74	0.0224
50	0.3	0.7	1	1	0.03	0.04	0.04	0	10	1	402.8	0.0226
50	0.3	0.1	1	1	0.03	0.04	0.04	0.3	10	1	300.95	0.0196
50	0.3	0.01	1	1	0.03	0.04	0.04	0	10	1	287.76	0.0172
50	0.3	0.5	1	1	0.03	0.04	0.04	0.2	10	1	346.02	0.0206
50	0.3	0.3	1	1	0.03	0.04	0.04	0	10	1	314.35	0.0223
50	0.3	0.6	1	1	0.03	0.04	0.04	0.9	10	1	372.84	0.0205
50	0.3	0.3	1	1	0.03	0.04	0.2	0	10	1	307.19	0.0202
50	0.3	0.5	1	1	0.03	0.04	0.2	0.2	10	1	346.23	0.0261
50	0.9	0.9	1	1	0.03	0.04	0.04	0.1	10	1	1793.3	0.0183
50	0.3	0.2	1	1	0.03	0.04	0.2	0.3	10	1	301.99	0.019
50	0.3	0.5	1	1	0.03	0.04	0.04	0.5	10	1	323.84	0.0199
50	0.3	0.8	1	1	0.03	0.04	0.04	0.9	10	1	431.9	0.0194
50	0.3	0.1	1	1	0.03	0.04	0.04	0.4	10	1	301.51	0.0214
50	0.3	0.2	1	1	0.03	0.04	0.04	0	10	1	301.13	0.0193
50	0.3	0.6	1	1	0.03	0.04	0.04	0.2	10	1	362.53	0.0223
50	0.3	0.7	1	1	0.03	0.04	0.2	0.5	10	1	440.43	0.0347
50	0.3	0.2	1	1	0.03	0.04	0.04	0.1	10	1	309.09	0.0213
50	0.4	0.8	1	1	0.03	0.04	0.2	0.7	10	1	675.71	0.0506
50	0.3	0.3	1	1	0.03	0.04	0.2	0.3	10	1	317.2	0.0198
50	0.4	0.5	1	1	0.03	0.04	0.04	0.4	10	1	374.76	0.0204
50	0.3	0.4	1	1	0.03	0.04	0.2	0.2	10	1	340.92	0.0234
50	0.3	0.4	1	1	0.03	0.04	0.04	0.3	10	1	327.17	0.0206
50	0.3	0.3	1	1	0.03	0.04	0.2	0.2	10	1	317.89	0.0216
50	0.3	0.3	1	1	0.03	0.04	0.04	0.3	10	1	316.38	0.0181
50	0.4	0.9	1	1	0.03	0.04	0.04	0.7	10	1	632.64	0.0163
50	0.3	0.2	1	1	0.03	0.04	0.04	0.3	10	1	297.95	0.0195
50	0.3	0.4	1	1	0.03	0.04	0.2	0.9	10	1	323.67	0.0235
50	0.2	0.6	1	1	0.03	0.04	0.04	0.1	10	1	343.07	0.0241
50	0.3	0.3	1	1	0.03	0.04	0.2	0.6	10	1	309.21	0.0196
50	0.3	0.6	1	1	0.03	0.04	0.2	0.9	10	1	405.21	0.0312
50	0.3	0.3	1	1	0.03	0.04	0.04	0.2	10	1	324.19	0.0216
50	0.3	0.8	1	1	0.03	0.04	0.2	0.2	10	1	601.27	0.049
50	0.3	0.3	1	1	0.03	0.04	0.2	0.1	10	1	320.42	0.0199
50	0.3	0.6	1	1	0.03	0.04	0.2	0.2	10	1	385.06	0.0308
50	0.3	0.3	1	1	0.03	0.04	0.04	0.1	10	1	316.07	0.0213
50	0.3	0.1	1	1	0.03	0.04	0.2	0.3	10	1	299.71	0.0189
50	0.3	0.01	1	1	0.03	0.04	0.04	0.1	10	1	291.5	0.0203
50	0.3	0.5	1	1	0.03	0.04	0.2	0.3	10	1	352.31	0.0255
50	0.2	0.4	1	1	0.03	0.04	0.2	0.3	10	1	297.1	0.0235
50	0.3	0.01	1	1	0.03	0.04	0.2	0	10	1	294.36	0.0184
50	0.3	0.3	1	1	0.03	0.04	0.04	0.7	10	1	306.42	0.0191
50	0.3	0.3	1	1	0.03	0.04	0.2	0.7	10	1	307.83	0.0206
50	0.3	0.1	1	1	0.03	0.04	0.2	0.9	10	1	289.66	0.0173
50	0.3	0.2	1	1	0.03	0.04	0.04	0.7	10	1	310.34	0.0207
50	0.4	0.8	1	1	0.03	0.04	0.2	0.8	10	1	625.12	0.0468
50	0.3	0.4	1	1	0.03	0.04	0.04	0	10	1	332.16	0.0209
50	0.4	0.8	1	1	0.03	0.04	0.2	0	10	1	609.6	0.0481
50	0.3	0.7	1	1	0.03	0.04	0.04	0.1	10	1	402.84	0.0231
50	0.3	0.01	1	1	0.03	0.04	0.04	0.4	10	1	286.4	0.0181
50	0.3	0.5	1	1	0.03	0.04	0.04	0	10	1	329.85	0.0224
50	0.3	0.1	1	1	0.03	0.04	0.2	0.7	10	1	292.51	0.0168
50	0.3	0.2	1	1	0.03	0.04	0.2	0.8	10	1	305.09	0.0204
50	0.3	0.01	1	1	0.03	0.04	0.04	0.6	10	1	285.98	0.0197
50	0.3	0.4	1	1	0.03	0.04	0.2	0.3	10	1	331.09	0.0242
50	0.3	0.8	1	1	0.03	0.04	0.04	0.6	10	1	462.11	0.0206
50	0.3	0.3	1	1	0.03	0.04	0.2	0.9	10	1	321.1	0.0205
50	0.3	0.2	1	1	0.03	0.04	0.04	0.9	10	1	308.92	0.0212
50	0.3	0.3	1	1	0.03	0.04	0.04	0.6	10	1	304.2	0.0184
50	0.3	0.3	1	1	0.03	0.04	0.04	0.9	10	1	317.32	0.0196
50	0.4	0.9	1	1	0.03	0.04	0.04	0.3	10	1	708.44	0.0239
50	0.3	0.1	1	1	0.03	0.04	0.04	0.9	10	1	301.39	0.0204
50	0.3	0.6	1	1	0.03	0.04	0.04	0.6	10	1	376.14	0.0225
50	0.2	0.3	1	1	0.03	0.04	0.2	0.4	10	1	279.62	0.0194
50	0.2	0.3	1	1	0.03	0.04	0.2	0.5	10	1	287.34	0.0231
50	0.3	0.7	1	1	0.03	0.04	0.04	0.4	10	1	407.23	0.0233
50	0.4	0.8	1	1	0.03	0.04	0.2	0.5	10	1	628.21	0.0485
50	0.2	0.6	1	1	0.03	0.04	0.04	0.6	10	1	347.76	0.0226
50	0.3	0.1	1	1	0.03	0.04	0.04	0.7	10	1	290.46	0.0177
50	0.3	0.01	1	1	0.03	0.04	0.04	0.5	10	1	293.53	0.019
50	0.2	0.3	1	1	0.03	0.04	0.04	0.1	10	1	290.74	0.0219
50	0.3	0.4	1	1	0.03	0.04	0.04	0.9	10	1	329.39	0.02
50	0.3	0.3	1	1	0.03	0.04	0.04	0.8	10	1	313.26	0.0192
50	0.3	0.6	1	1	0.03	0.04	0.04	0.1	10	1	385.72	0.0254
50	0.3	0.7	1	1	0.03	0.04	0.04	0.7	10	1	399.21	0.0206
50	0.3	0.5	1	1	0.03	0.04	0.2	0.5	10	1	366.15	0.0271
50	0.3	0.01	1	1	0.03	0.04	0.2	0.5	10	1	280.93	0.0145
50	0.3	0.5	1	1	0.03	0.04	0.04	0.9	10	1	347.24	0.022
50	0.3	0.8	1	1	0.03	0.04	0.04	0.5	10	1	447.36	0.0191
50	0.3	0.1	1	1	0.03	0.04	0.04	0.6	10	1	299.97	0.0178
50	0.3	0.2	1	1	0.03	0.04	0.04	0.5	10	1	302.73	0.0187
50	0.3	0.01	1	1	0.03	0.04	0.04	0.3	10	1	300.53	0.0203
50	0.3	0.1	1	1	0.03	0.04	0.04	0.8	10	1	297.1	0.0205
50	0.3	0.6	1	1	0.03	0.04	0.2	0.6	10	1	389.58	0.03
50	0.3	0.4	1	1	0.03	0.04	0.2	0.7	10	1	333.01	0.0202
50	0.9	0.01	1	1	0.03	0.04	0.04	0.4	10	1	1418.1	0.019
50	0.2	0.1	1	1	0.03	0.04	0.04	0.3	10	1	268.01	0.0193
50	0.3	0.01	1	1	0.03	0.04	0.04	0.9	10	1	293.65	0.0185
50	0.3	0.3	1	1	0.03	0.04	0.2	0.4	10	1	315.14	0.0219
50	0.3	0.7	1	1	0.03	0.04	0.04	0.2	10	1	403.73	0.0237
50	0.3	0.01	1	1	0.03	0.04	0.04	0.2	10	1	280.49	0.0165
50	0.3	0.7	1	1	0.03	0.04	0.2	0.7	10	1	476.84	0.0386
50	0.3	0.5	1	1	0.03	0.04	0.04	0.1	10	1	333.77	0.0213
50	0.3	0.8	1	1	0.03	0.04	0.2	0.8	10	1	596.75	0.0498
50	0.3	0.8	1	1	0.03	0.04	0.04	0.1	10	1	494.17	0.0258
50	0.3	0.2	1	1	0.03	0.04	0.04	0.6	10	1	301.69	0.0184
50	0.3	0.6	1	1	0.03	0.04	0.2	0.8	10	1	406.98	0.0324
50	0.2	0.1	1	1	0.03	0.04	0.04	0.2	10	1	279.58	0.0207
50	0.3	0.01	1	1	0.03	0.04	0.2	0.3	10	1	297.26	0.0158
50	0.3	0.7	1	1	0.03	0.04	0.2	0	10	1	452.19	0.0384
50	0.2	0.01	1	1	0.03	0.04	0.04	0.4	10	1	267.73	0.0203
50	0.3	0.2	1	1	0.03	0.04	0.04	0.8	10	1	295.59	0.0177
50	0.3	0.1	1	1	0.03	0.04	0.2	0.4	10	1	303.71	0.0196
50	0.2	0.8	1	1	0.03	0.04	0.04	0.5	10	1	411.82	0.0221
50	0.3	0.6	1	1	0.03	0.04	0.2	0	10	1	415.78	0.0309
50	0.3	0.7	1	1	0.03	0.04	0.2	0.3	10	1	459.33	0.0375
50	0.3	0.4	1	1	0.03	0.04	0.2	0.4	10	1	323.8	0.0218
50	0.3	0.3	1	1	0.03	0.04	0.2	0.5	10	1	315.88	0.0203
50	0.4	0.8	1	1	0.03	0.04	0.2	0.9	10	1	612.8	0.044
50	0.4	0.1	1	1	0.03	0.04	0.04	0.4	10	1	341.64	0.0207
50	0.3	0.7	1	1	0.03	0.04	0.2	0.4	10	1	450.19	0.0374
50	0.2	0.01	1	1	0.03	0.04	0.04	0.5	10	1	262.22	0.0196
50	0.3	0.01	1	1	0.03	0.04	0.2	0.2	10	1	291.71	0.0165
50	0.3	0.01	1	1	0.03	0.04	0.04	0.8	10	1	292.4	0.0181
50	0.3	0.1	1	1	0.03	0.04	0.2	0.6	10	1	298.15	0.0167
50	0.9	0.99	1	1	0.03	0.04	0.04	0	10	1	4190.6	0.0232
50	0.3	0.8	1	1	0.03	0.04	0.2	0.1	10	1	606.59	0.0518
50	0.8	0.99	1	1	0.03	0.04	0.04	0.4	10	1	2542.8	0.0136
50	0.3	0.3	1	1	0.03	0.04	0.04	0.4	10	1	328.51	0.0225
50	0.8	0.99	1	1	0.03	0.04	0.2	0.9	10	1	3172	0.0303
50	0.3	0.9	1	1	0.03	0.04	0.04	0.6	10	1	557.05	0.0147
50	0.2	0.8	1	1	0.03	0.04	0.04	0.6	10	1	434.87	0.0191
50	0.2	0.1	1	1	0.03	0.04	0.04	0.6	10	1	269.52	0.0201
50	0.3	0.01	1	1	0.03	0.04	0.2	0.1	10	1	291.85	0.0176
50	0.3	0.8	1	1	0.03	0.04	0.04	0.4	10	1	490.04	0.0227
50	0.3	0.8	1	1	0.03	0.04	0.04	0.8	10	1	436.18	0.018
50	0.2	0.01	1	1	0.03	0.04	0.04	0	10	1	266.63	0.02
50	0.2	0.7	1	1	0.03	0.04	0.04	0.4	10	1	378.18	0.0207
50	0.3	0.4	1	1	0.03	0.04	0.04	0.5	10	1	322.44	0.0189
50	0.3	0.01	1	1	0.03	0.04	0.2	0.8	10	1	280.54	0.0171
50	0.3	0.1	1	1	0.03	0.04	0.04	0.5	10	1	303.62	0.0212
50	0.4	0.9	1	1	0.03	0.04	0.04	0	10	1	755.03	0.0285
50	0.3	0.6	1	1	0.03	0.04	0.04	0.3	10	1	371.06	0.0235
50	0.3	0.4	1	1	0.03	0.04	0.2	0.8	10	1	316.17	0.0209
50	0.3	0.6	1	1	0.03	0.04	0.04	0.4	10	1	367.42	0.0201
50	0.3	0.6	1	1	0.03	0.04	0.2	0.7	10	1	400.72	0.0304
50	0.2	0.1	1	1	0.03	0.04	0.04	0	10	1	272.98	0.0209
50	0.3	0.01	1	1	0.03	0.04	0.2	0.4	10	1	278.34	0.0156
50	0.3	0.3	1	1	0.03	0.04	0.04	0.5	10	1	320.57	0.0206
50	0.3	0.2	1	1	0.03	0.04	0.2	0.6	10	1	299.27	0.0191
50	0.2	0.2	1	1	0.03	0.04	0.2	0.8	10	1	275.24	0.0189
50	0.2	0.1	1	1	0.03	0.04	0.04	0.4	10	1	268.02	0.019
50	0.2	0.01	1	1	0.03	0.04	0.2	0.6	10	1	266.99	0.0181
50	0.2	0.9	1	1	0.03	0.04	0.04	0.6	10	1	564.77	0.0172
50	0.2	0.99	1	1	0.03	0.04	0.04	0.7	10	1	796.48	0.0043
50	0.3	0.99	1	1	0.03	0.04	0.04	0.8	10	1	853.87	0.0043
50	0.3	0.01	1	1	0.03	0.04	0.2	0.7	10	1	285.16	0.016
50	0.9	0.6	1	1	0.03	0.04	0.04	0.9	10	1	1711.6	0.0316
50	0.2	0.6	1	1	0.03	0.04	0.04	0.3	10	1	326.03	0.0213
50	0.3	0.7	1	1	0.03	0.04	0.2	0.2	10	1	463.73	0.0393
50	0.2	0.4	1	1	0.03	0.04	0.2	0.2	10	1	325.91	0.0259
50	0.2	0.7	1	1	0.03	0.04	0.04	0.9	10	1	340.77	0.019
50	0.2	0.6	1	1	0.03	0.04	0.2	0.2	10	1	358.87	0.0318
50	0.2	0.01	1	1	0.03	0.04	0.04	0.3	10	1	267.49	0.0184
50	0.3	0.7	1	1	0.03	0.04	0.04	0.8	10	1	405.05	0.0229
50	0.2	0.3	1	1	0.03	0.04	0.2	0.6	10	1	290.57	0.0218
50	0.3	0.7	1	1	0.03	0.04	0.2	0.6	10	1	462.46	0.0385
50	0.3	0.6	1	1	0.03	0.04	0.2	0.3	10	1	380.84	0.0302
50	0.2	0.7	1	1	0.03	0.04	0.04	0.1	10	1	392.78	0.0261
50	0.2	0.4	1	1	0.03	0.04	0.04	0.3	10	1	291.66	0.0207
50	0.2	0.1	1	1	0.03	0.04	0.04	0.8	10	1	283.99	0.0208
50	0.3	0.9	1	1	0.03	0.04	0.04	0.5	10	1	627.81	0.0184
50	0.2	0.8	1	1	0.03	0.04	0.04	0.2	10	1	462.89	0.0257
50	0.3	0.9	1	1	0.03	0.04	0.04	0.4	10	1	643.18	0.0212
50	0.2	0.3	1	1	0.03	0.04	0.2	0.2	10	1	269.67	0.0196
50	0.3	0.7	1	1	0.03	0.04	0.04	0.6	10	1	417.34	0.0217
50	0.2	0.4	1	1	0.03	0.04	0.04	0.1	10	1	281.09	0.0203
50	0.3	0.5	1	1	0.03	0.04	0.2	0.9	10	1	358.37	0.0267
50	0.3	0.7	1	1	0.03	0.04	0.2	0.1	10	1	456.46	0.0382
50	0.3	0.8	1	1	0.03	0.04	0.2	0.4	10	1	583.03	0.0516
50	0.9	0.99	1	1	0.03	0.04	0.04	0.7	10	1	3351.3	0.0131
50	0.2	0.3	1	1	0.03	0.04	0.04	0.6	10	1	289.82	0.0218
50	0.2	0.4	1	1	0.03	0.04	0.2	0.1	10	1	305.96	0.0235
50	0.2	0.3	1	1	0.03	0.04	0.04	0.4	10	1	288.08	0.0204
50	0.2	0.8	1	1	0.03	0.04	0.2	0.4	10	1	568.29	0.0505
50	0.2	0.4	1	1	0.03	0.04	0.2	0	10	1	291.36	0.022
50	0.2	0.2	1	1	0.03	0.04	0.2	0.2	10	1	277.08	0.0196
50	0.2	0.2	1	1	0.03	0.04	0.2	0.3	10	1	268.14	0.0182
50	0.2	0.01	1	1	0.03	0.04	0.2	0.3	10	1	266.42	0.0167
50	0.7	0.99	1	1	0.03	0.04	0.2	0.6	10	1	3883.3	0.0555
50	0.2	0.2	1	1	0.03	0.04	0.2	0.1	10	1	276.47	0.0197
50	0.2	0.3	1	1	0.03	0.04	0.2	0	10	1	286.93	0.0237
50	0.2	0.3	1	1	0.03	0.04	0.04	0.5	10	1	279.61	0.017
50	0.3	0.8	1	1	0.03	0.04	0.2	0.9	10	1	558.57	0.0444
50	0.1	0.99	1	1	0.03	0.04	0.04	0.9	10	1	505.13	0.0012
50	0.2	0.5	1	1	0.03	0.04	0.2	0.1	10	1	305.81	0.0225
50	0.2	0.2	1	1	0.03	0.04	0.04	0.3	10	1	282.3	0.0192
50	0.2	0.2	1	1	0.03	0.04	0.04	0.1	10	1	284.24	0.0192
50	0.2	0.7	1	1	0.03	0.04	0.04	0.5	10	1	365.4	0.0234
50	0.2	0.8	1	1	0.03	0.04	0.04	0.9	10	1	432.87	0.0199
50	0.2	0.6	1	1	0.03	0.04	0.04	0	10	1	333.28	0.0218
50	0.2	0.4	1	1	0.03	0.04	0.04	0	10	1	289.8	0.0198
50	0.2	0.6	1	1	0.03	0.04	0.04	0.9	10	1	313.64	0.0183
50	0.3	0.5	1	1	0.03	0.04	0.04	0.6	10	1	332.56	0.0221
50	0.2	0.7	1	1	0.03	0.04	0.04	0.7	10	1	354.3	0.0193
50	0.2	0.3	1	1	0.03	0.04	0.04	0.3	10	1	280.54	0.0208
50	0.2	0.4	1	1	0.03	0.04	0.04	0.2	10	1	289.07	0.0203
50	0.1	0.99	1	1	0.03	0.04	0.04	0.7	10	1	623.23	0.0019
50	0.2	0.01	1	1	0.03	0.04	0.2	0.8	10	1	255.02	0.0184
50	0.2	0.6	1	1	0.03	0.04	0.04	0.5	10	1	355.46	0.0248
50	0.2	0.7	1	1	0.03	0.04	0.04	0.3	10	1	366.4	0.0223
50	0.3	0.99	1	1	0.03	0.04	0.04	0.4	10	1	1337.8	0.0118
50	0.2	0.5	1	1	0.03	0.04	0.04	0.1	10	1	319.36	0.0216
50	0.2	0.2	1	1	0.03	0.04	0.04	0.4	10	1	279.15	0.0195
50	0.3	0.9	1	1	0.03	0.04	0.04	0.3	10	1	663.11	0.0225
50	0.2	0.3	1	1	0.03	0.04	0.04	0.9	10	1	269.53	0.0191
50	0.2	0.01	1	1	0.03	0.04	0.2	0.2	10	1	262.96	0.02
50	0.3	0.9	1	1	0.03	0.04	0.04	0.1	10	1	690.97	0.0273
50	0.2	0.3	1	1	0.03	0.04	0.2	0.8	10	1	277.31	0.0192
50	0.2	0.3	1	1	0.03	0.04	0.2	0.3	10	1	287.15	0.0219
50	0.3	0.9	1	1	0.03	0.04	0.04	0.2	10	1	652.49	0.0241
50	0.5	0.9	1	1	0.03	0.04	0.2	0.9	10	1	983	0.0523
50	0.3	0.8	1	1	0.03	0.04	0.2	0.5	10	1	608.75	0.0531
50	0.2	0.3	1	1	0.03	0.04	0.04	0	10	1	287.31	0.0206
50	0.2	0.9	1	1	0.03	0.04	0.04	0.8	10	1	491.14	0.013
50	0.2	0.2	1	1	0.03	0.04	0.04	0.2	10	1	276.49	0.0202
50	0.2	0.1	1	1	0.03	0.04	0.2	0.1	10	1	270.01	0.0197
50	0.2	0.8	1	1	0.03	0.04	0.04	0.8	10	1	416.6	0.0191
50	0.5	0.9	1	1	0.03	0.04	0.2	0.3	10	1	1048.1	0.0687
50	0.2	0.8	1	1	0.03	0.04	0.04	0.4	10	1	445.95	0.0211
50	0.2	0.7	1	1	0.03	0.04	0.04	0.8	10	1	361.38	0.0207
50	0.2	0.5	1	1	0.03	0.04	0.2	0.3	10	1	342.06	0.0281
50	0.2	0.8	1	1	0.03	0.04	0.2	0.5	10	1	574.03	0.0475
50	0.2	0.2	1	1	0.03	0.04	0.04	0	10	1	273.1	0.02
50	0.2	0.1	1	1	0.03	0.04	0.2	0.2	10	1	275.04	0.0191
50	0.2	0.5	1	1	0.03	0.04	0.2	0.8	10	1	334.47	0.0266
50	0.2	0.6	1	1	0.03	0.04	0.2	0	10	1	384.38	0.0342
50	0.6	0.99	1	1	0.03	0.04	0.04	0.5	10	1	1946.5	0.014
50	0.7	0.99	1	1	0.03	0.04	0.2	0.5	10	1	3950.8	0.0575
50	0.2	0.6	1	1	0.03	0.04	0.2	0.5	10	1	348.75	0.0307
50	0.3	0.4	1	1	0.03	0.04	0.04	0.8	10	1	335.81	0.0229
50	0.2	0.5	1	1	0.03	0.04	0.04	0.9	10	1	316.3	0.0218
50	0.2	0.6	1	1	0.03	0.04	0.04	0.4	10	1	332.63	0.0205
50	0.1	0.3	1	1	0.03	0.04	0.2	0.5	10	1	275.06	0.0234
50	0.1	0.2	1	1	0.03	0.04	0.2	0	10	1	253.8	0.019
50	0.2	0.5	1	1	0.03	0.04	0.2	0.9	10	1	316.24	0.0262
50	0.2	0.5	1	1	0.03	0.04	0.2	0.2	10	1	336.31	0.0285
50	0.2	0.3	1	1	0.03	0.04	0.04	0.2	10	1	285.58	0.0197
50	0.2	0.4	1	1	0.03	0.04	0.04	0.5	10	1	297.64	0.0211
50	0.2	0.5	1	1	0.03	0.04	0.04	0.7	10	1	306.74	0.0208
50	0.2	0.6	1	1	0.03	0.04	0.04	0.7	10	1	331.67	0.0207
50	0.2	0.99	1	1	0.03	0.04	0.04	0.8	10	1	720.48	0.0023
50	0.1	0.2	1	1	0.03	0.04	0.04	0.1	10	1	259.62	0.0198
50	0.2	0.5	1	1	0.03	0.04	0.2	0	10	1	340.11	0.029
50	0.2	0.2	1	1	0.03	0.04	0.2	0	10	1	283.93	0.0191
50	0.4	0.9	1	1	0.03	0.04	0.2	0.5	10	1	989.15	0.0698
50	0.2	0.5	1	1	0.03	0.04	0.04	0.3	10	1	305.15	0.0192
50	0.1	0.6	1	1	0.03	0.04	0.2	0	10	1	349.96	0.0335
50	0.2	0.2	1	1	0.03	0.04	0.2	0.5	10	1	262.86	0.0171
50	0.2	0.2	1	1	0.03	0.04	0.2	0.6	10	1	283.56	0.0202
50	0.2	0.01	1	1	0.03	0.04	0.2	0.1	10	1	268.85	0.0177
50	0.2	0.6	1	1	0.03	0.04	0.04	0.2	10	1	336.58	0.0231
50	0.1	0.2	1	1	0.03	0.04	0.04	0.9	10	1	246.94	0.0198
50	0.1	0.1	1	1	0.03	0.04	0.2	0.4	10	1	255.97	0.0238
50	0.1	0.1	1	1	0.03	0.04	0.2	0.3	10	1	250.51	0.0191
50	0.2	0.1	1	1	0.03	0.04	0.04	0.7	10	1	268.8	0.0209
50	0.2	0.1	1	1	0.03	0.04	0.2	0.4	10	1	256.48	0.0185
50	0.2	0.99	1	1	0.03	0.04	0.04	0.9	10	1	580.62	0.0008
50	0.2	0.6	1	1	0.03	0.04	0.2	0.4	10	1	370.05	0.0325
50	0.2	0.4	1	1	0.03	0.04	0.04	0.4	10	1	296.26	0.0199
50	0.2	0.5	1	1	0.03	0.04	0.04	0.6	10	1	303.88	0.0196
50	0.2	0.3	1	1	0.03	0.04	0.2	0.7	10	1	282.91	0.0198
50	0.2	0.8	1	1	0.03	0.04	0.04	0.3	10	1	454.12	0.0253
50	0.2	0.4	1	1	0.03	0.04	0.2	0.9	10	1	308.68	0.0231
50	0.1	0.4	1	1	0.03	0.04	0.2	0.6	10	1	276.58	0.023
50	0.2	0.1	1	1	0.03	0.04	0.2	0.3	10	1	270.98	0.0187
50	0.1	0.6	1	1	0.03	0.04	0.04	0.1	10	1	295.56	0.0203
50	0.2	0.2	1	1	0.03	0.04	0.04	0.5	10	1	260.18	0.0189
50	0.2	0.01	1	1	0.03	0.04	0.2	0.9	10	1	259.83	0.0162
50	0.2	0.1	1	1	0.03	0.04	0.2	0	10	1	261.3	0.0167
50	0.2	0.2	1	1	0.03	0.04	0.2	0.7	10	1	271.73	0.0203
50	0.2	0.8	1	1	0.03	0.04	0.2	0.8	10	1	585.87	0.0547
50	0.2	0.1	1	1	0.03	0.04	0.2	0.9	10	1	267.22	0.0194
50	0.1	0.3	1	1	0.03	0.04	0.04	0.8	10	1	275.73	0.0246
50	0.2	0.4	1	1	0.03	0.04	0.2	0.6	10	1	309.51	0.0239
50	0.2	0.2	1	1	0.03	0.04	0.2	0.9	10	1	272.11	0.0177
50	0.2	0.6	1	1	0.03	0.04	0.2	0.8	10	1	370.92	0.0343
50	0.2	0.2	1	1	0.03	0.04	0.04	0.9	10	1	280.24	0.021
50	0.5	0.99	1	1	0.03	0.04	0.04	0	10	1	2602.2	0.0347
50	0.2	0.4	1	1	0.03	0.04	0.04	0.9	10	1	291.18	0.0177
50	0.2	0.4	1	1	0.03	0.04	0.04	0.6	10	1	301.45	0.0191
50	0.2	0.7	1	1	0.03	0.04	0.2	0.4	10	1	431.44	0.0404
50	0.2	0.2	1	1	0.03	0.04	0.2	0.4	10	1	274.18	0.0195
50	0.2	0.1	1	1	0.03	0.04	0.04	0.1	10	1	276.65	0.0191
50	0.2	0.3	1	1	0.03	0.04	0.2	0.9	10	1	280.15	0.0215
50	0.1	0.4	1	1	0.03	0.04	0.2	0.4	10	1	291.14	0.026
50	0.2	0.4	1	1	0.03	0.04	0.04	0.8	10	1	310.29	0.0236
50	0.2	0.1	1	1	0.03	0.04	0.2	0.6	10	1	269.13	0.0187
50	0.2	0.4	1	1	0.03	0.04	0.2	0.4	10	1	303.85	0.0251
50	0.2	0.4	1	1	0.03	0.04	0.04	0.7	10	1	299.61	0.0224
50	0.2	0.9	1	1	0.03	0.04	0.04	0.7	10	1	499.37	0.0138
50	0.2	0.7	1	1	0.03	0.04	0.2	0.8	10	1	432.51	0.0397
50	0.2	0.5	1	1	0.03	0.04	0.2	0.6	10	1	328.13	0.0259
50	0.2	0.01	1	1	0.03	0.04	0.04	0.8	10	1	270.36	0.0204
50	0.2	0.1	1	1	0.03	0.04	0.2	0.5	10	1	274.84	0.02
50	0.5	0.99	1	1	0.03	0.04	0.2	0.7	10	1	2871.6	0.0529
50	0.2	0.2	1	1	0.03	0.04	0.04	0.7	10	1	276.22	0.0202
50	0.2	0.1	1	1	0.03	0.04	0.04	0.5	10	1	275.94	0.0204
50	0.2	0.2	1	1	0.03	0.04	0.04	0.6	10	1	284.34	0.0208
50	0.2	0.1	1	1	0.03	0.04	0.04	0.9	10	1	270.49	0.0183
50	0.2	0.5	1	1	0.03	0.04	0.2	0.7	10	1	331.27	0.0275
50	0.2	0.3	1	1	0.03	0.04	0.2	0.1	10	1	283.8	0.0215
50	0.2	0.01	1	1	0.03	0.04	0.2	0.7	10	1	261	0.0166
50	0.2	0.3	1	1	0.03	0.04	0.04	0.7	10	1	299.75	0.0237
50	0.1	0.8	1	1	0.03	0.04	0.04	0	10	1	402.68	0.0244
50	0.2	0.5	1	1	0.03	0.04	0.04	0.4	10	1	298.64	0.0183
50	0.2	0.7	1	1	0.03	0.04	0.2	0.7	10	1	417.74	0.0352
50	0.1	0.9	1	1	0.03	0.04	0.04	0.8	10	1	501.6	0.0132
50	0.9	0.99	1	1	0.03	0.04	0.04	0.4	10	1	3507.9	0.0159
50	0.2	0.1	1	1	0.03	0.04	0.2	0.8	10	1	277.97	0.0186
50	0.2	0.01	1	1	0.03	0.04	0.2	0	10	1	271.99	0.0198
50	0.2	0.01	1	1	0.03	0.04	0.2	0.5	10	1	270.76	0.0165
50	0.2	0.4	1	1	0.03	0.04	0.2	0.7	10	1	303.81	0.0248
50	0.2	0.01	1	1	0.03	0.04	0.04	0.2	10	1	269.49	0.0204
50	0.1	0.01	1	1	0.03	0.04	0.04	0.2	10	1	245.11	0.0199
50	0.2	0.4	1	1	0.03	0.04	0.2	0.8	10	1	313.61	0.0245
50	0.2	0.6	1	1	0.03	0.04	0.2	0.9	10	1	372.54	0.0317
50	0.1	0.9	1	1	0.03	0.04	0.04	0.7	10	1	487.32	0.0132
50	0.2	0.01	1	1	0.03	0.04	0.04	0.9	10	1	271.24	0.0191
50	0.2	0.2	1	1	0.03	0.04	0.04	0.8	10	1	277.4	0.0201
50	0.1	0.5	1	1	0.03	0.04	0.04	0	10	1	289.34	0.0228
50	0.1	0.01	1	1	0.03	0.04	0.2	0.5	10	1	257.88	0.0185
50	0.5	0.9	1	1	0.03	0.04	0.2	0.4	10	1	1074	0.0678
50	0.1	0.8	1	1	0.03	0.04	0.04	0.8	10	1	375.81	0.0171
50	0.2	0.1	1	1	0.03	0.04	0.2	0.7	10	1	280.28	0.0188
50	0.2	0.5	1	1	0.03	0.04	0.04	0.5	10	1	322.4	0.0227
50	0.1	0.5	1	1	0.03	0.04	0.2	0.4	10	1	317.26	0.03
50	0.1	0.1	1	1	0.03	0.04	0.2	0.5	10	1	251.83	0.0186
50	0.1	0.01	1	1	0.03	0.04	0.2	0	10	1	253.52	0.0191
50	0.5	0.9	1	1	0.03	0.04	0.2	0	10	1	1100.2	0.075
50	0.2	0.01	1	1	0.03	0.04	0.04	0.1	10	1	287.39	0.0226
50	0.1	0.4	1	1	0.03	0.04	0.2	0.5	10	1	287.09	0.0249
50	0.2	0.6	1	1	0.03	0.04	0.04	0.8	10	1	323.16	0.0205
50	0.2	0.5	1	1	0.03	0.04	0.2	0.5	10	1	338.39	0.0276
50	0.2	0.4	1	1	0.03	0.04	0.2	0.5	10	1	323.75	0.0268
50	0.1	0.9	1	1	0.03	0.04	0.04	0.9	10	1	467.14	0.0121
50	0.4	0.9	1	1	0.03	0.04	0.2	0.4	10	1	1012.1	0.0672
50	0.2	0.5	1	1	0.03	0.04	0.04	0.8	10	1	298.8	0.0205
50	0.2	0.5	1	1	0.03	0.04	0.2	0.4	10	1	347.3	0.0283
50	0.1	0.01	1	1	0.03	0.04	0.2	0.3	10	1	253.43	0.019
50	0.1	0.5	1	1	0.03	0.04	0.04	0.3	10	1	274.22	0.0205
50	0.3	0.9	1	1	0.03	0.04	0.04	0	10	1	692.86	0.0275
50	0.3	0.9	1	1	0.03	0.04	0.2	0.7	10	1	901.97	0.0619
50	0.2	0.3	1	1	0.03	0.04	0.04	0.8	10	1	289.75	0.0204
50	0.2	0.01	1	1	0.03	0.04	0.04	0.6	10	1	270.9	0.0178
50	0.2	0.7	1	1	0.03	0.04	0.04	0	10	1	374.64	0.024
50	0.1	0.7	1	1	0.03	0.04	0.04	0.3	10	1	361.52	0.0222
50	0.2	0.7	1	1	0.03	0.04	0.2	0.6	10	1	444.18	0.0397
50	0.2	0.01	1	1	0.03	0.04	0.04	0.7	10	1	277.94	0.0209
50	0.1	0.8	1	1	0.03	0.04	0.04	0.5	10	1	404.58	0.0225
50	0.2	0.7	1	1	0.03	0.04	0.2	0.3	10	1	452.91	0.042
50	0.2	0.6	1	1	0.03	0.04	0.2	0.7	10	1	370.66	0.0315
50	0.2	0.7	1	1	0.03	0.04	0.2	0.9	10	1	442.85	0.038
50	0.7	0.99	1	1	0.03	0.04	0.04	0	10	1	3222.1	0.0314
50	0.2	0.5	1	1	0.03	0.04	0.04	0	10	1	307.12	0.0203
50	0.1	0.6	1	1	0.03	0.04	0.04	0.2	10	1	315.92	0.0216
50	0.2	0.01	1	1	0.03	0.04	0.2	0.4	10	1	267.05	0.0188
50	0.2	0.9	1	1	0.03	0.04	0.04	0.3	10	1	609.81	0.0195
50	0.3	0.6	1	1	0.03	0.04	0.2	0.4	10	1	412.54	0.0324
50	0.2	0.7	1	1	0.03	0.04	0.04	0.2	10	1	365.08	0.0217
50	0.2	0.6	1	1	0.03	0.04	0.2	0.3	10	1	366.29	0.0332
50	0.2	0.99	1	1	0.03	0.04	0.04	0.6	10	1	845.42	0.0053
50	0.8	0.99	1	1	0.03	0.04	0.04	0.2	10	1	3088	0.0228
50	0.2	0.6	1	1	0.03	0.04	0.2	0.6	10	1	369.91	0.0346
50	0.4	0.9	1	1	0.03	0.04	0.2	0.3	10	1	1052.2	0.0724
50	0.3	0.8	1	1	0.03	0.04	0.2	0.6	10	1	609.7	0.0515
50	0.3	0.99	1	1	0.03	0.04	0.04	0.6	10	1	1033.4	0.0064
50	0.9	0.99	1	1	0.03	0.04	0.04	0.5	10	1	3563.6	0.0148
50	0.2	0.8	1	1	0.03	0.04	0.04	0.7	10	1	421.35	0.0202
50	0.1	0.5	1	1	0.03	0.04	0.04	0.5	10	1	289.5	0.02
50	0.1	0.7	1	1	0.03	0.04	0.2	0.4	10	1	440.48	0.0456
50	0.2	0.8	1	1	0.03	0.04	0.04	0	10	1	458.44	0.0255
50	0.3	0.99	1	1	0.03	0.04	0.04	0.5	10	1	1181.1	0.0086
50	0.4	0.99	1	1	0.03	0.04	0.04	0.5	10	1	1374.6	0.0106
50	0.7	0.99	1	1	0.03	0.04	0.2	0.4	10	1	3907.2	0.0603
50	0.1	0.7	1	1	0.03	0.04	0.04	0.4	10	1	337.31	0.0212
50	0.4	0.99	1	1	0.03	0.04	0.04	0.6	10	1	1312.8	0.0083
50	0.1	0.99	1	1	0.03	0.04	0.04	0.8	10	1	572.52	0.002
50	0.1	0.2	1	1	0.03	0.04	0.04	0.2	10	1	270.19	0.0225
50	0.1	0.6	1	1	0.03	0.04	0.2	0.6	10	1	350.53	0.0325
50	0.1	0.1	1	1	0.03	0.04	0.2	0.8	10	1	259.34	0.0225
50	0.1	0.2	1	1	0.03	0.04	0.04	0.5	10	1	256.28	0.0211
50	0.1	0.8	1	1	0.03	0.04	0.2	0.4	10	1	540.47	0.052
50	0.1	0.3	1	1	0.03	0.04	0.04	0.5	10	1	262.16	0.022
50	0.2	0.6	1	1	0.03	0.04	0.2	0.1	10	1	375.53	0.034
50	0.2	0.7	1	1	0.03	0.04	0.04	0.6	10	1	370.08	0.0198
50	0.1	0.2	1	1	0.03	0.04	0.2	0.9	10	1	263.66	0.0221
50	0.1	0.01	1	1	0.03	0.04	0.04	0.1	10	1	259.23	0.0198
50	0.6	0.99	1	1	0.03	0.04	0.2	0.4	10	1	3573.2	0.0669
50	0.1	0.99	1	1	0.03	0.04	0.04	0.5	10	1	876.54	0.0055
50	0.3	0.9	1	1	0.03	0.04	0.2	0.2	10	1	1017.6	0.0798
50	0.1	0.3	1	1	0.03	0.04	0.2	0.9	10	1	262.98	0.0226
50	0.1	0.3	1	1	0.03	0.04	0.04	0	10	1	252.12	0.019
50	0.2	0.7	1	1	0.03	0.04	0.2	0.5	10	1	446.15	0.0398
50	0.1	0.5	1	1	0.03	0.04	0.04	0.7	10	1	282.15	0.0197
50	0.1	0.6	1	1	0.03	0.04	0.04	0	10	1	309.98	0.0224
50	0.1	0.3	1	1	0.03	0.04	0.04	0.7	10	1	272.57	0.0209
50	0.2	0.9	1	1	0.03	0.04	0.04	0.2	10	1	680.59	0.0281
50	0.1	0.3	1	1	0.03	0.04	0.04	0.4	10	1	259.95	0.022
50	0.1	0.1	1	1	0.03	0.04	0.04	0.5	10	1	258.24	0.0222
50	0.1	0.3	1	1	0.03	0.04	0.04	0.6	10	1	257.28	0.0199
50	0.2	0.9	1	1	0.03	0.04	0.04	0.5	10	1	536.83	0.0169
50	0.1	0.1	1	1	0.03	0.04	0.2	0.1	10	1	241.9	0.0181
50	0.1	0.2	1	1	0.03	0.04	0.04	0.6	10	1	244.55	0.0187
50	0.1	0.01	1	1	0.03	0.04	0.04	0.6	10	1	247.36	0.0193
50	0.2	0.9	1	1	0.03	0.04	0.04	0.1	10	1	649.24	0.0273
50	0.1	0.5	1	1	0.03	0.04	0.2	0.5	10	1	311.44	0.0301
50	0.1	0.4	1	1	0.03	0.04	0.04	0.4	10	1	266.57	0.0201
50	0.1	0.3	1	1	0.03	0.04	0.04	0.2	10	1	268.52	0.0205
50	0.3	0.9	1	1	0.03	0.04	0.2	0.6	10	1	946.1	0.0698
50	0.2	0.9	1	1	0.03	0.04	0.04	0.9	10	1	478.07	0.0115
50	0.1	0.2	1	1	0.03	0.04	0.04	0.4	10	1	252.48	0.0187
50	0.1	0.5	1	1	0.03	0.04	0.2	0	10	1	305.27	0.0267
50	0.1	0.4	1	1	0.03	0.04	0.04	0.2	10	1	277.06	0.0205
50	0.1	0.7	1	1	0.03	0.04	0.04	0.8	10	1	324.3	0.0197
50	0.1	0.1	1	1	0.03	0.04	0.04	0.4	10	1	252.18	0.0201
50	0.1	0.2	1	1	0.03	0.04	0.2	0.5	10	1	251.38	0.0202
50	0.1	0.3	1	1	0.03	0.04	0.2	0.2	10	1	253.23	0.0202
50	0.1	0.6	1	1	0.03	0.04	0.04	0.5	10	1	292.42	0.0217
50	0.1	0.1	1	1	0.03	0.04	0.04	0.3	10	1	238.27	0.0187
50	0.1	0.4	1	1	0.03	0.04	0.04	0.1	10	1	274.62	0.0229
50	0.1	0.3	1	1	0.03	0.04	0.2	0.3	10	1	275.63	0.0235
50	0.4	0.9	1	1	0.03	0.04	0.2	0.2	10	1	1071.7	0.0769
50	0.2	0.8	1	1	0.03	0.04	0.2	0.3	10	1	593.46	0.0572
50	0.1	0.3	1	1	0.03	0.04	0.04	0.3	10	1	264.28	0.0222
50	0.4	0.9	1	1	0.03	0.04	0.2	0.9	10	1	951.82	0.0571
50	0.2	0.5	1	1	0.03	0.04	0.04	0.2	10	1	313.8	0.0217
50	0.3	0.99	1	1	0.03	0.04	0.04	0.7	10	1	1008.2	0.0054
50	0.1	0.6	1	1	0.03	0.04	0.2	0.7	10	1	345.74	0.0321
50	0.1	0.4	1	1	0.03	0.04	0.04	0.9	10	1	275.47	0.0191
50	0.1	0.3	1	1	0.03	0.04	0.2	0.4	10	1	275.73	0.0217
50	0.1	0.6	1	1	0.03	0.04	0.04	0.3	10	1	313.36	0.0219
50	0.1	0.2	1	1	0.03	0.04	0.2	0.2	10	1	258.44	0.0213
50	0.2	0.99	1	1	0.03	0.04	0.04	0.5	10	1	1158.1	0.0086
50	0.1	0.9	1	1	0.03	0.04	0.04	0.2	10	1	629.49	0.028
50	0.3	0.9	1	1	0.03	0.04	0.2	0.4	10	1	941.79	0.0682
50	0.1	0.1	1	1	0.03	0.04	0.2	0.2	10	1	257.01	0.0209
50	0.1	0.5	1	1	0.03	0.04	0.04	0.1	10	1	290.29	0.0222
50	0.1	0.6	1	1	0.03	0.04	0.2	0.1	10	1	331.76	0.0305
50	0.1	0.3	1	1	0.03	0.04	0.2	0.7	10	1	266.64	0.0231
50	0.1	0.5	1	1	0.03	0.04	0.04	0.2	10	1	290.55	0.0215
50	0.1	0.4	1	1	0.03	0.04	0.2	0	10	1	289.31	0.0256
50	0.1	0.7	1	1	0.03	0.04	0.04	0.6	10	1	354.9	0.0223
50	0.1	0.1	1	1	0.03	0.04	0.2	0.9	10	1	241.32	0.0179
50	0.1	0.1	1	1	0.03	0.04	0.2	0	10	1	248.94	0.0193
50	0.1	0.01	1	1	0.03	0.04	0.2	0.6	10	1	240.94	0.0169
50	0.1	0.2	1	1	0.03	0.04	0.2	0.4	10	1	256.67	0.0194
50	0.1	0.4	1	1	0.03	0.04	0.04	0	10	1	281.26	0.0226
50	0.2	0.8	1	1	0.03	0.04	0.04	0.1	10	1	472.22	0.0257
50	0.1	0.4	1	1	0.03	0.04	0.04	0.3	10	1	278.16	0.0221
50	0.1	0.5	1	1	0.03	0.04	0.04	0.9	10	1	286.36	0.0219
50	0.1	0.6	1	1	0.03	0.04	0.04	0.9	10	1	309.1	0.0201
50	0.1	0.1	1	1	0.03	0.04	0.04	0	10	1	248.89	0.0201
50	0.1	0.4	1	1	0.03	0.04	0.2	0.3	10	1	278.12	0.0219
50	0.1	0.2	1	1	0.03	0.04	0.04	0.3	10	1	263.27	0.0197
50	0.1	0.4	1	1	0.03	0.04	0.2	0.1	10	1	289.11	0.0265
50	0.1	0.2	1	1	0.03	0.04	0.2	0.1	10	1	259.78	0.0233
50	0.2	0.7	1	1	0.03	0.04	0.2	0.2	10	1	445.96	0.0412
50	0.1	0.4	1	1	0.03	0.04	0.2	0.2	10	1	288.97	0.0253
50	0.1	0.6	1	1	0.03	0.04	0.04	0.8	10	1	316.06	0.0206
50	0.1	0.01	1	1	0.03	0.04	0.2	0.4	10	1	261.82	0.0196
50	0.1	0.6	1	1	0.03	0.04	0.04	0.6	10	1	317.8	0.023
50	0.4	0.9	1	1	0.03	0.04	0.2	0.8	10	1	927.32	0.0569
50	0.2	0.7	1	1	0.03	0.04	0.2	0.1	10	1	437.62	0.0419
50	0.1	0.6	1	1	0.03	0.04	0.04	0.7	10	1	313.96	0.0214
50	0.1	0.4	1	1	0.03	0.04	0.2	0.9	10	1	280.84	0.0259
50	0.5	0.99	1	1	0.03	0.04	0.04	0.2	10	1	2210	0.0225
50	0.1	0.7	1	1	0.03	0.04	0.04	0.7	10	1	346.23	0.0203
50	0.1	0.5	1	1	0.03	0.04	0.2	0.1	10	1	316.86	0.0302
50	0.1	0.1	1	1	0.03	0.04	0.04	0.1	10	1	260.62	0.0219
50	0.1	0.2	1	1	0.03	0.04	0.04	0.7	10	1	246.94	0.021
50	0.1	0.3	1	1	0.03	0.04	0.2	0	10	1	281.68	0.0269
50	0.1	0.4	1	1	0.03	0.04	0.04	0.7	10	1	283.17	0.0227
50	0.1	0.2	1	1	0.03	0.04	0.2	0.8	10	1	258.49	0.0206
50	0.1	0.3	1	1	0.03	0.04	0.04	0.1	10	1	281.25	0.0223
50	0.1	0.5	1	1	0.03	0.04	0.04	0.8	10	1	306.29	0.0219
50	0.1	0.5	1	1	0.03	0.04	0.2	0.8	10	1	309.03	0.0273
50	0.1	0.1	1	1	0.03	0.04	0.04	0.9	10	1	247.98	0.0205
50	0.1	0.5	1	1	0.03	0.04	0.2	0.7	10	1	310.67	0.0279
50	0.1	0.2	1	1	0.03	0.04	0.2	0.3	10	1	259.68	0.0204
50	0.1	0.3	1	1	0.03	0.04	0.2	0.6	10	1	284.06	0.0243
50	0.1	0.5	1	1	0.03	0.04	0.2	0.6	10	1	301.43	0.0263
50	0.1	0.2	1	1	0.03	0.04	0.04	0	10	1	264.71	0.0223
50	0.1	0.4	1	1	0.03	0.04	0.04	0.6	10	1	269.34	0.0204
50	0.1	0.5	1	1	0.03	0.04	0.2	0.2	10	1	320.75	0.0304
50	0.1	0.6	1	1	0.03	0.04	0.2	0.9	10	1	346.85	0.0326
50	0.1	0.6	1	1	0.03	0.04	0.2	0.3	10	1	349.06	0.0333
50	0.1	0.3	1	1	0.03	0.04	0.2	0.8	10	1	273.79	0.0238
50	0.1	0.5	1	1	0.03	0.04	0.04	0.6	10	1	300.12	0.0225
50	0.1	0.4	1	1	0.03	0.04	0.04	0.5	10	1	284.4	0.0216
50	0.2	0.7	1	1	0.03	0.04	0.2	0	10	1	448.66	0.0403
50	0.1	0.1	1	1	0.03	0.04	0.04	0.6	10	1	246.6	0.0186
50	0.1	0.2	1	1	0.03	0.04	0.2	0.6	10	1	251.14	0.0207
50	0.1	0.5	1	1	0.03	0.04	0.2	0.9	10	1	308.09	0.0275
50	0.1	0.6	1	1	0.03	0.04	0.04	0.4	10	1	324.98	0.0219
50	0.1	0.6	1	1	0.03	0.04	0.2	0.5	10	1	354.66	0.0344
50	0.1	0.1	1	1	0.03	0.04	0.2	0.6	10	1	251.39	0.021
50	0.1	0.3	1	1	0.03	0.04	0.2	0.1	10	1	283.18	0.0253
50	0.3	0.7	1	1	0.03	0.04	0.2	0.8	10	1	433.65	0.0356
50	0.1	0.2	1	1	0.03	0.04	0.04	0.8	10	1	261.56	0.0217
50	0.01	0.99	1	1	0.03	0.04	0.04	0.9	10	1	327.66	0.0007
50	0.1	0.8	1	1	0.03	0.04	0.2	0.6	10	1	553.13	0.0532
50	0.1	0.2	1	1	0.03	0.04	0.2	0.7	10	1	257.78	0.0208
50	0.1	0.6	1	1	0.03	0.04	0.2	0.2	10	1	342.01	0.0318
50	0.2	0.8	1	1	0.03	0.04	0.2	0.7	10	1	596.37	0.0525
50	0.01	0.5	1	1	0.03	0.04	0.04	0.8	10	1	262.59	0.0218
50	0.1	0.7	1	1	0.03	0.04	0.04	0.5	10	1	344.39	0.0217
50	0.1	0.1	1	1	0.03	0.04	0.04	0.7	10	1	248.66	0.0201
50	0.2	0.8	1	1	0.03	0.04	0.2	0.2	10	1	609.06	0.0593
50	0.1	0.7	1	1	0.03	0.04	0.04	0	10	1	329.23	0.0218
50	0.1	0.4	1	1	0.03	0.04	0.04	0.8	10	1	268.52	0.021
50	0.1	0.8	1	1	0.03	0.04	0.2	0.1	10	1	557.55	0.0581
50	0.1	0.6	1	1	0.03	0.04	0.2	0.4	10	1	359.14	0.0368
50	0.3	0.9	1	1	0.03	0.04	0.2	0.9	10	1	878.37	0.055
50	0.1	0.7	1	1	0.03	0.04	0.2	0.2	10	1	427.03	0.0425
50	0.1	0.01	1	1	0.03	0.04	0.04	0.9	10	1	258.79	0.0206
50	0.1	0.01	1	1	0.03	0.04	0.2	0.2	10	1	259.96	0.0199
50	0.5	0.2	1	1	0.03	0.04	0.2	0.6	10	1	358.03	0.0124
50	0.1	0.3	1	1	0.03	0.04	0.04	0.9	10	1	265.45	0.0202
50	0.1	0.01	1	1	0.03	0.04	0.04	0.4	10	1	261.21	0.0199
50	0.2	0.9	1	1	0.03	0.04	0.04	0.4	10	1	595.87	0.0217
50	0.1	0.7	1	1	0.03	0.04	0.2	0.3	10	1	418.18	0.0437
50	0.1	0.01	1	1	0.03	0.04	0.04	0.7	10	1	248.87	0.0201
50	0.1	0.01	1	1	0.03	0.04	0.2	0.7	10	1	255.32	0.0201
50	0.1	0.01	1	1	0.03	0.04	0.04	0.5	10	1	251.86	0.0194
50	0.1	0.01	1	1	0.03	0.04	0.2	0.9	10	1	246.16	0.0198
50	0.1	0.5	1	1	0.03	0.04	0.04	0.4	10	1	294.17	0.024
50	0.1	0.1	1	1	0.03	0.04	0.2	0.7	10	1	247.44	0.0214
50	0.1	0.01	1	1	0.03	0.04	0.2	0.8	10	1	253.92	0.0166
50	0.1	0.7	1	1	0.03	0.04	0.04	0.2	10	1	342.58	0.0212
50	0.01	0.3	1	1	0.03	0.04	0.2	0.6	10	1	276.05	0.025
50	0.1	0.01	1	1	0.03	0.04	0.04	0.3	10	1	255.04	0.0225
50	0.1	0.7	1	1	0.03	0.04	0.2	0.9	10	1	420.99	0.041
50	0.1	0.1	1	1	0.03	0.04	0.04	0.8	10	1	254.3	0.0221
50	0.01	0.6	1	1	0.03	0.04	0.04	0.8	10	1	281.57	0.0216
50	0.01	0.4	1	1	0.03	0.04	0.04	0.7	10	1	261.46	0.02
50	0.01	0.5	1	1	0.03	0.04	0.04	0	10	1	281.38	0.0217
50	0.01	0.5	1	1	0.03	0.04	0.2	0.3	10	1	283.09	0.026
50	0.2	0.8	1	1	0.03	0.04	0.2	0.1	10	1	590.18	0.0547
50	0.8	0.99	1	1	0.03	0.04	0.2	0.6	10	1	3967.7	0.045
50	0.01	0.6	1	1	0.03	0.04	0.2	0.6	10	1	340.06	0.0351
50	0.01	0.5	1	1	0.03	0.04	0.04	0.7	10	1	261.42	0.0197
50	0.1	0.7	1	1	0.03	0.04	0.04	0.1	10	1	359.19	0.0237
50	0.1	0.8	1	1	0.03	0.04	0.2	0.9	10	1	543.7	0.0516
50	0.01	0.7	1	1	0.03	0.04	0.04	0.2	10	1	328.17	0.0243
50	0.1	0.01	1	1	0.03	0.04	0.2	0.1	10	1	259.47	0.0201
50	0.1	0.01	1	1	0.03	0.04	0.04	0.8	10	1	257.14	0.0198
50	0.1	0.8	1	1	0.03	0.04	0.2	0.7	10	1	506.78	0.0502
50	0.01	0.1	1	1	0.03	0.04	0.2	0	10	1	239.04	0.0216
50	0.01	0.99	1	1	0.03	0.04	0.04	0.8	10	1	373.18	0.0008
50	0.01	0.8	1	1	0.03	0.04	0.04	0.4	10	1	373.81	0.0221
50	0.1	0.4	1	1	0.03	0.04	0.2	0.8	10	1	305.82	0.0286
50	0.1	0.4	1	1	0.03	0.04	0.2	0.7	10	1	290.33	0.0241
50	0.01	0.2	1	1	0.03	0.04	0.04	0.9	10	1	252.26	0.0206
50	0.01	0.99	1	1	0.03	0.04	0.04	0.7	10	1	389.3	0.0014
50	0.01	0.3	1	1	0.03	0.04	0.04	0.7	10	1	229.1	0.019
50	0.01	0.1	1	1	0.03	0.04	0.2	0.1	10	1	233.88	0.0191
50	0.1	0.8	1	1	0.03	0.04	0.04	0.7	10	1	408.55	0.0202
50	0.01	0.1	1	1	0.03	0.04	0.04	0	10	1	238.98	0.0183
50	0.4	0.9	1	1	0.03	0.04	0.2	0	10	1	1044.9	0.0831
50	0.3	0.9	1	1	0.03	0.04	0.2	0.8	10	1	939.39	0.0633
50	0.01	0.2	1	1	0.03	0.04	0.2	0	10	1	250.91	0.0232
50	0.01	0.5	1	1	0.03	0.04	0.2	0.6	10	1	300.81	0.0304
50	0.01	0.3	1	1	0.03	0.04	0.2	0.3	10	1	252	0.0232
50	0.01	0.2	1	1	0.03	0.04	0.2	0.8	10	1	247.07	0.0226
50	0.01	0.1	1	1	0.03	0.04	0.2	0.7	10	1	251.15	0.0213
50	0.1	0.8	1	1	0.03	0.04	0.04	0.6	10	1	403.28	0.0208
50	0.1	0.8	1	1	0.03	0.04	0.04	0.9	10	1	394.39	0.0187
50	0.2	0.8	1	1	0.03	0.04	0.2	0	10	1	556.96	0.0538
50	0.01	0.7	1	1	0.03	0.04	0.04	0	10	1	327.09	0.0235
50	0.01	0.7	1	1	0.03	0.04	0.04	0.4	10	1	323.86	0.0226
50	0.1	0.7	1	1	0.03	0.04	0.2	0	10	1	424.02	0.0435
50	0.01	0.7	1	1	0.03	0.04	0.2	0.7	10	1	405.77	0.0432
50	0.1	0.8	1	1	0.03	0.04	0.04	0.2	10	1	427.56	0.0246
50	0.01	0.8	1	1	0.03	0.04	0.04	0.5	10	1	390.98	0.0211
50	0.1	0.1	1	1	0.03	0.04	0.04	0.2	10	1	251.4	0.0207
50	0.1	0.7	1	1	0.03	0.04	0.04	0.9	10	1	343.98	0.0223
50	0.01	0.8	1	1	0.03	0.04	0.04	0.9	10	1	364.41	0.0183
50	0.01	0.7	1	1	0.03	0.04	0.2	0.2	10	1	405.43	0.0433
50	0.1	0.7	1	1	0.03	0.04	0.2	0.8	10	1	434.41	0.0412
50	0.1	0.8	1	1	0.03	0.04	0.04	0.4	10	1	418.92	0.0225
50	0.01	0.7	1	1	0.03	0.04	0.2	0.5	10	1	411.07	0.043
50	0.4	0.99	1	1	0.03	0.04	0.04	0.4	10	1	1567.6	0.0128
50	0.4	0.9	1	1	0.03	0.04	0.2	0.1	10	1	1025	0.0763
50	0.01	0.7	1	1	0.03	0.04	0.04	0.5	10	1	339.22	0.0222
50	0.1	0.6	1	1	0.03	0.04	0.2	0.8	10	1	344.82	0.0326
50	0.01	0.01	1	1	0.03	0.04	0.04	0.2	10	1	295.31	0.0185
50	0.1	0.9	1	1	0.03	0.04	0.04	0	10	1	684.33	0.032
50	0.2	0.9	1	1	0.03	0.04	0.04	0	10	1	710.38	0.0319
50	0.01	0.7	1	1	0.03	0.04	0.2	0.6	10	1	384.8	0.0399
50	0.1	0.7	1	1	0.03	0.04	0.2	0.5	10	1	418.39	0.0417
50	0.01	0.2	1	1	0.03	0.04	0.04	0.8	10	1	238.72	0.0209
50	0.01	0.2	1	1	0.03	0.04	0.04	0.1	10	1	246.33	0.022
50	0.4	0.9	1	1	0.03	0.04	0.2	0.7	10	1	1015.5	0.0644
50	0.01	0.9	1	1	0.03	0.04	0.04	0.5	10	1	470.3	0.0168
50	0.01	0.2	1	1	0.03	0.04	0.04	0.2	10	1	238.46	0.0199
50	0.01	0.7	1	1	0.03	0.04	0.2	0.3	10	1	398.74	0.044
50	0.1	0.7	1	1	0.03	0.04	0.2	0.1	10	1	432.6	0.0431
50	0.01	0.8	1	1	0.03	0.04	0.04	0.1	10	1	429.74	0.0261
50	0.01	0.01	1	1	0.03	0.04	0.04	0.6	10	1	319.46	0.0218
50	0.01	0.6	1	1	0.03	0.04	0.2	0.2	10	1	329.17	0.0325
50	0.01	0.5	1	1	0.03	0.04	0.04	0.2	10	1	262.19	0.0188
50	0.1	0.9	1	1	0.03	0.04	0.2	0.6	10	1	892.31	0.0697
50	0.2	0.8	1	1	0.03	0.04	0.2	0.6	10	1	597.24	0.0549
50	0.01	0.3	1	1	0.03	0.04	0.04	0.9	10	1	238.99	0.02
50	0.7	0.99	1	1	0.03	0.04	0.2	0.3	10	1	4293.3	0.0689
50	0.01	0.6	1	1	0.03	0.04	0.04	0.3	10	1	290.86	0.0207
50	0.1	0.01	1	1	0.03	0.04	0.04	0	10	1	254.49	0.0204
50	0.01	0.5	1	1	0.03	0.04	0.04	0.6	10	1	263.73	0.0189
50	0.01	0.4	1	1	0.03	0.04	0.2	0.7	10	1	271.29	0.0259
50	0.3	0.9	1	1	0.03	0.04	0.2	0.3	10	1	996.23	0.0769
50	0.3	0.9	1	1	0.03	0.04	0.2	0.5	10	1	1007.5	0.0726
50	0.01	0.7	1	1	0.03	0.04	0.2	0.9	10	1	395.21	0.0423
50	0.2	0.99	1	1	0.03	0.04	0.04	0.2	10	1	1395.7	0.0165
50	0.01	0.6	1	1	0.03	0.04	0.04	0.5	10	1	284.13	0.0202
50	0.01	0.7	1	1	0.03	0.04	0.04	0.8	10	1	329.43	0.0205
50	0.01	0.8	1	1	0.03	0.04	0.04	0.8	10	1	370.63	0.0197
50	0.6	0.99	1	1	0.03	0.04	0.04	0.3	10	1	2422.7	0.0194
50	0.01	0.1	1	1	0.03	0.04	0.2	0.9	10	1	241.72	0.0191
50	0.01	0.3	1	1	0.03	0.04	0.04	0.8	10	1	254.21	0.0206
50	0.01	0.7	1	1	0.03	0.04	0.2	0.1	10	1	400.55	0.0443
50	0.01	0.3	1	1	0.03	0.04	0.2	0.8	10	1	255.73	0.0229
50	0.01	0.1	1	1	0.03	0.04	0.04	0.6	10	1	248.38	0.0211
50	0.5	0.99	1	1	0.03	0.04	0.04	0.1	10	1	2488.3	0.028
50	0.01	0.5	1	1	0.03	0.04	0.04	0.9	10	1	270.44	0.0211
50	0.01	0.01	1	1	0.03	0.04	0.2	0.1	10	1	324.34	0.02
50	0.2	0.8	1	1	0.03	0.04	0.2	0.9	10	1	591.5	0.0497
50	0.01	0.5	1	1	0.03	0.04	0.04	0.4	10	1	263.54	0.0204
50	0.01	0.5	1	1	0.03	0.04	0.04	0.3	10	1	264.44	0.0199
50	0.01	0.5	1	1	0.03	0.04	0.2	0.5	10	1	289.36	0.0287
50	0.1	0.99	1	1	0.03	0.04	0.04	0.3	10	1	1224	0.0139
50	0.01	0.6	1	1	0.03	0.04	0.04	0.9	10	1	289.71	0.0212
50	0.01	0.5	1	1	0.03	0.04	0.2	0.8	10	1	290.94	0.0302
50	0.01	0.4	1	1	0.03	0.04	0.04	0	10	1	266.58	0.0229
50	0.01	0.2	1	1	0.03	0.04	0.2	0.3	10	1	240.53	0.0209
50	0.01	0.5	1	1	0.03	0.04	0.2	0.7	10	1	287.26	0.0262
50	0.01	0.7	1	1	0.03	0.04	0.04	0.3	10	1	330.49	0.0243
50	0.01	0.5	1	1	0.03	0.04	0.04	0.1	10	1	280.69	0.0234
50	0.01	0.2	1	1	0.03	0.04	0.2	0.4	10	1	229	0.0213
50	0.01	0.6	1	1	0.03	0.04	0.04	0.6	10	1	311.97	0.0233
50	0.01	0.2	1	1	0.03	0.04	0.04	0.3	10	1	241.52	0.0202
50	0.01	0.01	1	1	0.03	0.04	0.2	0.3	10	1	304.75	0.0201
50	0.01	0.5	1	1	0.03	0.04	0.04	0.5	10	1	265.86	0.0217
50	0.01	0.6	1	1	0.03	0.04	0.04	0.7	10	1	296.2	0.0208
50	0.01	0.8	1	1	0.03	0.04	0.2	0.4	10	1	555.81	0.0578
50	0.01	0.7	1	1	0.03	0.04	0.04	0.1	10	1	316.47	0.0199
50	0.9	0.99	1	1	0.03	0.04	0.2	0.5	10	1	4337.1	0.0332
50	0.01	0.3	1	1	0.03	0.04	0.04	0.1	10	1	234.99	0.0196
50	0.01	0.3	1	1	0.03	0.04	0.04	0.2	10	1	252.47	0.0241
50	0.01	0.7	1	1	0.03	0.04	0.04	0.6	10	1	322.34	0.0214
50	0.01	0.6	1	1	0.03	0.04	0.04	0.4	10	1	304.42	0.0221
50	0.01	0.2	1	1	0.03	0.04	0.04	0.7	10	1	231.32	0.0207
50	0.1	0.9	1	1	0.03	0.04	0.2	0.2	10	1	942.53	0.0789
50	0.01	0.3	1	1	0.03	0.04	0.2	0.9	10	1	265.79	0.0272
50	0.01	0.4	1	1	0.03	0.04	0.04	0.9	10	1	258.37	0.0212
50	0.01	0.4	1	1	0.03	0.04	0.2	0.1	10	1	263.16	0.0235
50	0.01	0.3	1	1	0.03	0.04	0.2	0.4	10	1	250.8	0.0201
50	0.01	0.2	1	1	0.03	0.04	0.04	0.6	10	1	237.41	0.0193
50	0.1	0.8	1	1	0.03	0.04	0.04	0.3	10	1	419.81	0.0239
50	0.01	0.3	1	1	0.03	0.04	0.04	0	10	1	251.55	0.0223
50	0.01	0.9	1	1	0.03	0.04	0.04	0.9	10	1	384.84	0.0075
50	0.01	0.4	1	1	0.03	0.04	0.2	0.3	10	1	274.39	0.0267
50	0.01	0.2	1	1	0.03	0.04	0.2	0.1	10	1	249.27	0.0244
50	0.01	0.3	1	1	0.03	0.04	0.2	0	10	1	252.09	0.0246
50	0.01	0.3	1	1	0.03	0.04	0.04	0.4	10	1	262.42	0.0209
50	0.01	0.01	1	1	0.03	0.04	0.2	0	10	1	318.69	0.0179
50	0.01	0.2	1	1	0.03	0.04	0.2	0.5	10	1	242.54	0.0212
50	0.01	0.4	1	1	0.03	0.04	0.04	0.2	10	1	256.23	0.0216
50	0.01	0.3	1	1	0.03	0.04	0.2	0.5	10	1	255.37	0.023
50	0.7	0.99	1	1	0.03	0.04	0.2	0.2	10	1	4384.5	0.0736
50	0.01	0.3	1	1	0.03	0.04	0.04	0.5	10	1	261.99	0.0234
50	0.01	0.2	1	1	0.03	0.04	0.04	0.4	10	1	238.32	0.0169
50	0.01	0.2	1	1	0.03	0.04	0.04	0.5	10	1	244.9	0.0195
50	0.01	0.4	1	1	0.03	0.04	0.04	0.4	10	1	252.59	0.0195
50	0.01	0.2	1	1	0.03	0.04	0.2	0.2	10	1	238.99	0.0233
50	0.1	0.9	1	1	0.03	0.04	0.04	0.5	10	1	568.52	0.0203
50	0.01	0.7	1	1	0.03	0.04	0.04	0.7	10	1	328.25	0.0204
50	0.01	0.3	1	1	0.03	0.04	0.2	0.1	10	1	258.47	0.0246
50	0.01	0.8	1	1	0.03	0.04	0.2	0.3	10	1	527.14	0.0559
50	0.01	0.2	1	1	0.03	0.04	0.2	0.7	10	1	240.68	0.0209
50	0.01	0.8	1	1	0.03	0.04	0.2	0	10	1	538.34	0.0615
50	0.01	0.1	1	1	0.03	0.04	0.2	0.5	10	1	238.89	0.0192
50	0.01	0.6	1	1	0.03	0.04	0.2	0.5	10	1	323.58	0.0323
50	0.01	0.3	1	1	0.03	0.04	0.04	0.6	10	1	252.61	0.0199
50	0.2	0.9	1	1	0.03	0.04	0.2	0.3	10	1	941.81	0.0743
50	0.1	0.5	1	1	0.03	0.04	0.2	0.3	10	1	304.72	0.0278
50	0.01	0.6	1	1	0.03	0.04	0.2	0.4	10	1	327.16	0.033
50	0.01	0.2	1	1	0.03	0.04	0.2	0.6	10	1	252.46	0.0216
50	0.01	0.4	1	1	0.03	0.04	0.2	0.9	10	1	272.96	0.0264
50	0.01	0.6	1	1	0.03	0.04	0.04	0.1	10	1	299.56	0.0237
50	0.1	0.7	1	1	0.03	0.04	0.2	0.6	10	1	429.69	0.0413
50	0.01	0.4	1	1	0.03	0.04	0.04	0.3	10	1	254.6	0.0217
50	0.01	0.1	1	1	0.03	0.04	0.04	0.7	10	1	238.76	0.0214
50	0.01	0.9	1	1	0.03	0.04	0.04	0.3	10	1	583.78	0.0245
50	0.01	0.4	1	1	0.03	0.04	0.04	0.5	10	1	263.95	0.0223
50	0.01	0.5	1	1	0.03	0.04	0.2	0.2	10	1	287.86	0.0277
50	0.01	0.1	1	1	0.03	0.04	0.04	0.4	10	1	237.97	0.0194
50	0.01	0.1	1	1	0.03	0.04	0.04	0.9	10	1	234.54	0.0195
50	0.01	0.1	1	1	0.03	0.04	0.04	0.5	10	1	243.67	0.0203
50	0.01	0.1	1	1	0.03	0.04	0.2	0.6	10	1	240.95	0.0185
50	0.01	0.9	1	1	0.03	0.04	0.04	0.7	10	1	450.33	0.0135
50	0.01	0.6	1	1	0.03	0.04	0.04	0	10	1	314.74	0.0252
50	0.01	0.1	1	1	0.03	0.04	0.04	0.8	10	1	237.85	0.0184
50	0.01	0.6	1	1	0.03	0.04	0.04	0.2	10	1	310.1	0.0232
50	0.01	0.5	1	1	0.03	0.04	0.2	0.1	10	1	305.1	0.0296
50	0.01	0.8	1	1	0.03	0.04	0.04	0.7	10	1	389.81	0.0209
50	0.01	0.1	1	1	0.03	0.04	0.2	0.8	10	1	238.86	0.0227
50	0.01	0.6	1	1	0.03	0.04	0.2	0.3	10	1	321.5	0.0325
50	0.01	0.8	1	1	0.03	0.04	0.04	0.6	10	1	388.02	0.0228
50	0.01	0.3	1	1	0.03	0.04	0.04	0.3	10	1	261.01	0.0222
50	0.01	0.01	1	1	0.03	0.04	0.04	0.5	10	1	320.81	0.0234
50	0.01	0.99	1	1	0.03	0.04	0.04	0.6	10	1	587.13	0.0026
50	0.01	0.4	1	1	0.03	0.04	0.04	0.8	10	1	255.97	0.0192
50	0.01	0.2	1	1	0.03	0.04	0.2	0.9	10	1	250.74	0.022
50	0.01	0.8	1	1	0.03	0.04	0.04	0.2	10	1	398.04	0.0245
50	0.01	0.6	1	1	0.03	0.04	0.2	0.8	10	1	327.39	0.032
50	0.01	0.1	1	1	0.03	0.04	0.2	0.4	10	1	247.65	0.0222
50	0.1	0.9	1	1	0.03	0.04	0.04	0.4	10	1	576.64	0.0211
50	0.01	0.4	1	1	0.03	0.04	0.2	0.8	10	1	268.04	0.025
50	0.01	0.4	1	1	0.03	0.04	0.04	0.6	10	1	267.74	0.0218
50	0.01	0.01	1	1	0.03	0.04	0.04	0.8	10	1	303.55	0.0176
50	0.01	0.1	1	1	0.03	0.04	0.04	0.2	10	1	245.88	0.0187
50	0.01	0.4	1	1	0.03	0.04	0.04	0.1	10	1	274.28	0.0238
50	0.01	0.8	1	1	0.03	0.04	0.2	0.1	10	1	580.9	0.062
50	0.01	0.4	1	1	0.03	0.04	0.2	0.2	10	1	283.1	0.0279
50	0.01	0.9	1	1	0.03	0.04	0.04	0	10	1	656.76	0.0348
50	0.01	0.1	1	1	0.03	0.04	0.04	0.3	10	1	242.04	0.0191
50	0.01	0.2	1	1	0.03	0.04	0.04	0	10	1	246.01	0.021
50	0.99	0.1	1	1	0.03	0.04	0.04	0.1	10	1	4720	0.0142
50	0.01	0.1	1	1	0.03	0.04	0.2	0.2	10	1	242.34	0.0219
50	0.01	0.4	1	1	0.03	0.04	0.2	0	10	1	281.09	0.026
50	0.01	0.6	1	1	0.03	0.04	0.2	0.7	10	1	331.43	0.0347
50	0.01	0.5	1	1	0.03	0.04	0.2	0.9	10	1	294.21	0.0292
50	0.01	0.01	1	1	0.03	0.04	0.2	0.9	10	1	304.65	0.0195
50	0.01	0.4	1	1	0.03	0.04	0.2	0.5	10	1	268.11	0.026
50	0.01	0.5	1	1	0.03	0.04	0.2	0	10	1	300.91	0.03
[truncated: 417 more rows]
